# Supplementary material for: Smoking cessation in individuals who use vaping as compared with traditional nicotine replacement therapies: a systematic review and meta-analysis
Source: PubMed Central journal article supplement — BMJ Open. 2021 Feb 22;11(2):e044222. doi: 10.1136/bmjopen-2020-044222 (PMC7903126; doi:10.1136/bmjopen-2020-044222), 2021-02-22
Supplement: bmjopen-2020-044222.draft_revisions.pdf [file bmjopen-2020-044222.draft_revisions.pdf]

# BMJ Open

BMJ Open is committed to open peer review. As part of this commitment we make the peer review history of every article we publish publicly available.

When an article is published we post the peer reviewers' comments and the authors' responses online. We also post the versions of the paper that were used during peer review. These are the versions that the peer review comments apply to.

The versions of the paper that follow are the versions that were submitted during the peer review process. They are not the versions of record or the final published versions. They should not be cited or distributed as the published version of this manuscript.

BMJ Open is an open access journal and the full, final, typeset and author-corrected version of record of the manuscript is available on our site with no access controls, subscription charges or pay-per-view fees (<http://bmjopen.bmj.com>).

If you have any questions on BMJ Open's open peer review process please email [info.bmjopen@bmj.com](mailto:info.bmjopen@bmj.com)

# BMJ Open

## Smoking cessation in individuals who use vaping as compared to traditional nicotine replacement therapies; a systematic review and meta-analysis

|                               |                                                                                                                                                                                                                                                                                                                                                                                                                                 |
|-------------------------------|---------------------------------------------------------------------------------------------------------------------------------------------------------------------------------------------------------------------------------------------------------------------------------------------------------------------------------------------------------------------------------------------------------------------------------|
| Journal:                      | <i>BMJ Open</i>                                                                                                                                                                                                                                                                                                                                                                                                                 |
| Manuscript ID                 | bmjopen-2020-044222                                                                                                                                                                                                                                                                                                                                                                                                             |
| Article Type:                 | Original research                                                                                                                                                                                                                                                                                                                                                                                                               |
| Date Submitted by the Author: | 26-Aug-2020                                                                                                                                                                                                                                                                                                                                                                                                                     |
| Complete List of Authors:     | Pound, Catherine; University of Ottawa Faculty of Medicine, Pediatrics and School of Epidemiology and Public Health; CHEO, Pediatrics<br>Zhang, Jennifer; University of Ottawa Faculty of Medicine, School of Epidemiology and Public Health<br>Kodua, Ama; University of Ottawa Faculty of Medicine, School of Epidemiology and Public Health<br>Sampson, Margaret; Children's Hospital of Eastern Ontario Research Institute, |
| Keywords:                     | PUBLIC HEALTH, RESPIRATORY MEDICINE (see Thoracic Medicine), INTERNAL MEDICINE                                                                                                                                                                                                                                                                                                                                                  |
|                               |                                                                                                                                                                                                                                                                                                                                                                                                                                 |

SCHOLARONE™  
Manuscripts

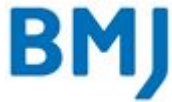

I, the Submitting Author has the right to grant and does grant on behalf of all authors of the Work (as defined in the below author licence), an exclusive licence and/or a non-exclusive licence for contributions from authors who are: i) UK Crown employees; ii) where BMJ has agreed a CC-BY licence shall apply, and/or iii) in accordance with the terms applicable for US Federal Government officers or employees acting as part of their official duties; on a worldwide, perpetual, irrevocable, royalty-free basis to BMJ Publishing Group Ltd ("BMJ") its licensees and where the relevant Journal is co-owned by BMJ to the co-owners of the Journal, to publish the Work in this journal and any other BMJ products and to exploit all rights, as set out in our [licence](#).

The Submitting Author accepts and understands that any supply made under these terms is made by BMJ to the Submitting Author unless you are acting as an employee on behalf of your employer or a postgraduate student of an affiliated institution which is paying any applicable article publishing charge ("APC") for Open Access articles. Where the Submitting Author wishes to make the Work available on an Open Access basis (and intends to pay the relevant APC), the terms of reuse of such Open Access shall be governed by a Creative Commons licence – details of these licences and which [Creative Commons](#) licence will apply to this Work are set out in our licence referred to above.

Other than as permitted in any relevant BMJ Author's Self Archiving Policies, I confirm this Work has not been accepted for publication elsewhere, is not being considered for publication elsewhere and does not duplicate material already published. I confirm all authors consent to publication of this Work and authorise the granting of this licence.

1  
2  
3 **Smoking cessation in individuals who use vaping as compared to traditional nicotine**  
4 **replacement therapies; a systematic review and meta-analysis**  
5

6  
7 Catherine Pound M Pound<sup>a,b,c</sup>, Jennifer Zhe Zhang<sup>c</sup>, Ama Tweneboa Kodua<sup>c</sup>, Margaret Sampson<sup>a</sup>  
8

9 **Affiliations:** <sup>a</sup>Department of Pediatrics, Children's Hospital of Eastern Ontario, Ottawa, Canada,  
10 <sup>b</sup>Faculty of Medicine, University of Ottawa, <sup>c</sup>School of Epidemiology and Public Health,  
11 University of Ottawa  
12  
13

14 **Address correspondence to:** Catherine Pound, Division of Pediatrics, Children's Hospital of  
15 Eastern Ontario, Ottawa, Canada, 401 Smyth Road, Ottawa, Ontario, K1H8L1, 613-737-7600, ext  
16 2701, [cpound@cheo.on.ca](mailto:cpound@cheo.on.ca)  
17  
18

19  
20 **Funding sources:** This research received no specific grant from any funding agency in the public,  
21 commercial or not-for-profit sectors.  
22  
23

24 **Competing interest statement:** The authors have no competing interest to declare.  
25

26 **Contributors statements:**

27 Dr Pound conceptualized and designed the study, carried out the analyses, interpreted the  
28 data, drafted the initial manuscript, reviewed, and revised the manuscript.

29 Mrs Zhang participated in the conceptualization and design of the study, carried out the  
30 analyses, interpreted the data, participated in drafting the initial manuscript, reviewed and  
31 revised the manuscript.  
32

33 Ms Kodua participated in the conceptualization and design of the study, and reviewed the  
34 manuscript.  
35

36 Dr Sampson participated in the design of the study, developed the search strategies, reviewed,  
37 and revised the manuscript.  
38

39 All authors approved the final manuscript as submitted and agree to be accountable for all  
40 aspects of the work.  
41  
42

43 **Systematic review registration number:** protocol registered with the International Prospective  
44 Register of Systematic Reviews (PROSPERO) on February 27<sup>th</sup>, 2020. Registration number  
45 pending.  
46  
47  
48

49 **Abstract word count: 290 words**

50 **Text word count: 4886 words**  
51  
52  
53  
54  
55  
56  
57  
58  
59  
60

## ABSTRACT

**Objectives:** Despite the aggressive marketing of electronic nicotine device systems (ENDS) as smoking cessation tools, the evidence of their effectiveness is mixed. We conducted a systematic review of randomized controlled trials to determine the effect of ENDS on cigarette smoking cessation, as compared to other types of nicotine replacement therapies (NRT).

**Methods:** We included randomized controlled trials in which any type of ENDS was compared to any type of NRT, in traditional cigarette users. We searched MEDLINE, Embase, and the CENTRAL Trials Registry of the Cochrane Collaboration using the Ovid interface, as well as ClinicalTrials.gov and the World Health Organization International Clinical Trials Registry Platform trials registries regardless of study completion status. We used the Revised Cochrane risk-of-bias tool for randomized trials (RoB 2) for each outcome of interest. The primary outcome was smoking cessation. Secondary outcomes included smoking reduction, harms, withdrawal, and acceptance of therapy. A random-effect model was used, and data were pooled in meta-analyses where appropriate.

**Results:** Six studies were retained from an initial 270. Most outcomes were judged to be at high risk of bias. The overall quality of evidence was graded as 'low' or 'very low'. Pooled results showed no difference in smoking cessation (RR 1.42 [0.97, 2.09]), proportion of participants reducing smoking consumption (RR 1.25 [0.79, 1.98]), mean reduction in cigarettes smoked per day (MD 1.11 [-0.41, 2.63]), or harms (RR 0.96 [0.76, 1.20]), between groups.

**Discussion:** We found no difference in smoking cessation, harms, and smoking reduction between e-cigarette and NRT users. However, the quality of the evidence was low. Further research is needed before widespread recommendations can be made with regards to the use of ENDS. Research is also needed to investigate the long-term effects of ENDS, as well as optimal dosing.

**Systematic review registration number:** protocol registered with the International Prospective Register of Systematic Reviews (PROSPERO) on February 27<sup>th</sup>, 2020. Registration number pending.

### Strengths and limitations of this study

- This study provides up to date meta-analyses of direct comparisons of vaping with nicotine replacement therapy for smoking cessation, studied through randomized controlled trials.
- We examined harms associated with vaping, which are becoming increasingly concerning.
- This study makes extensive efforts to obtain unreported data from investigators.
- Careful consideration is given to the potential impact of risk of bias and methodological heterogeneity.
- As we included only RCTs, many studies that used weaker study designs were ineligible for this review.

## SUMMARY OF FINDINGS TABLE

**Nicotine-containing Electronic cigarettes (ENDS) vs Nicotine Replacement Therapies (NRT) for smoking cessation**

| <b>Population:</b> Current smokers at enrolment into trials  |                                     |                                                 |                                                |                                                                                                                                                                                                                  |
|--------------------------------------------------------------|-------------------------------------|-------------------------------------------------|------------------------------------------------|------------------------------------------------------------------------------------------------------------------------------------------------------------------------------------------------------------------|
| <b>Intervention:</b> Nicotine-containing e-cigarettes        |                                     |                                                 |                                                |                                                                                                                                                                                                                  |
| <b>Comparison:</b> Nicotine-replacement therapies            |                                     |                                                 |                                                |                                                                                                                                                                                                                  |
| <b>Outcomes<br/>ENDS as compared to<br/>NRT</b>              | <b>Relative effect<br/>(95% CI)</b> | <b>Number of<br/>participants<br/>(studies)</b> | <b>Quality of the<br/>evidence<br/>(GRADE)</b> | <b>Comments</b>                                                                                                                                                                                                  |
| <b>Cessation</b>                                             | RR 1.42 [0.97, 2.09]                | 1800 (5 studies)                                | ⊕⊕ OO <sup>1,2</sup><br>low                    |                                                                                                                                                                                                                  |
| <b>Smoking reduction</b>                                     |                                     |                                                 |                                                |                                                                                                                                                                                                                  |
| Proportion of people decreasing cigarette consumption by 50% | RR 1.25 [0.79, 1.98]                | 1460 (4 studies)                                | ⊕⊕ OO <sup>1,2</sup><br>low                    |                                                                                                                                                                                                                  |
| Mean decrease in cigarettes per day                          | MD 1.11 [-0.41, 2.63]               | 633 (3 studies)                                 | ⊕⊕ OO <sup>1,2</sup><br>low                    |                                                                                                                                                                                                                  |
| <b>Adverse events (AEs)</b>                                  | RR 0.96 [0.76, 1.20]                | 758 (4 studies)                                 | ⊕ OOO <sup>1,2,3</sup><br>Very low             | No severe adverse events related to investigated products were reported                                                                                                                                          |
| <b>Withdrawal symptoms</b>                                   | Summary data not available          | 4 studies                                       | ⊕ OOO <sup>1,2,3</sup><br>Very low             | Withdrawal measures included Minnesota Nicotine Withdrawal Scale, QSU scores, frequency of urge and strength of urge score, and pre-specified symptoms of depressed mood, irritability, restlessness, and hunger |

|    |                              |               |           |                        |                                                                                                                                                                                                           |
|----|------------------------------|---------------|-----------|------------------------|-----------------------------------------------------------------------------------------------------------------------------------------------------------------------------------------------------------|
| 1  |                              |               |           |                        |                                                                                                                                                                                                           |
| 2  |                              |               |           |                        |                                                                                                                                                                                                           |
| 3  | <b>Acceptance of therapy</b> | Summary data  | 4 studies | ⊕ ○○○ <sup>1,2,3</sup> | Acceptance defined as wanting to recommend product to friends, helpfulness, taste, satisfaction, psychological reward, enjoyment of sensation, aversion, and ability to reduce craving depending on study |
| 4  |                              | not available |           | Very low               |                                                                                                                                                                                                           |
| 5  |                              |               |           |                        |                                                                                                                                                                                                           |
| 6  |                              |               |           |                        |                                                                                                                                                                                                           |
| 7  |                              |               |           |                        |                                                                                                                                                                                                           |
| 8  |                              |               |           |                        |                                                                                                                                                                                                           |
| 9  |                              |               |           |                        |                                                                                                                                                                                                           |
| 10 |                              |               |           |                        |                                                                                                                                                                                                           |
| 11 |                              |               |           |                        |                                                                                                                                                                                                           |
| 12 |                              |               |           |                        |                                                                                                                                                                                                           |
| 13 |                              |               |           |                        |                                                                                                                                                                                                           |
| 14 |                              |               |           |                        |                                                                                                                                                                                                           |
| 15 |                              |               |           |                        |                                                                                                                                                                                                           |
| 16 |                              |               |           |                        |                                                                                                                                                                                                           |

---

GRADE Working Group grades of evidence

High quality: Further research is very unlikely to change our confidence in the estimate of effect.

Moderate quality: Further research is likely to have an important impact on our confidence in the estimate of effect and may change the estimate.

Low quality: Further research is very likely to have an important impact on our confidence in the estimate of effect and is likely to change the estimate.

Very low quality: We are very uncertain about the estimate.

---

<sup>1</sup>Downgraded one level because of risk of bias

<sup>2</sup>Downgraded one level because of heterogeneity

<sup>3</sup>Downgraded one level because of imprecision of results

## INTRODUCTION

Despite a significant lack of rigorous pharmacological testing, the use of electronic nicotine device systems (ENDS), otherwise known as vaping devices, has been aggressively marketed as an effective method to quit smoking. In Canada, 32% of current and former smokers report having used ENDS as a smoking cessation aid. In addition to delivering nicotine to the user, ENDS are thought to replace some of the habitual behaviours and sensations associated with smoking, such as the action of bringing a cigarette to the mouth. By doing so, ENDS may provide coping mechanisms that other traditional nicotine replacement therapies (NRT) do not offer, and therefore may help with the behavioural component of smoking reduction and cessation.<sup>2</sup> While vaping is believed to be less harmful than cigarette smoking, a large number of emerging reports on the health impacts of vaping are worrisome. In addition, the evidence on the effectiveness of ENDS as a smoking cessation aid is mixed.

In 2016, a meta-analysis of 20 studies found that people using ENDS had a 28% reduction in the odds of stopping cigarette smoking as compared to those not using ENDS.<sup>3</sup> However, in a 2019 recent randomized controlled trial (RCT), individuals randomized to nicotine-containing e-cigarettes were more likely to abstain from smoking at one year compared to individuals randomized to nicotine patches (18% compared to 9.9%, RR 1.83; 95% CI 1.30 to 2.58).<sup>4</sup> A Cochrane review<sup>5</sup> found that nicotine-containing e-cigarettes were more effective than non-nicotine containing e-cigarettes for smoking cessation, but was not able to compare ENDS products to traditional NRT.

Little information is known about the long-term health impacts of ENDS. Reports of acute toxicity have recently captured the public's attention. In late 2019 and early 2020, "e-cigarette, or vaping, product use-associated lung injury" (EVALI) caused 2807 illnesses and 68 deaths in the US,<sup>6</sup> and 19 cases in Canada.<sup>7</sup> Other short-term adverse events reported with the use of ENDS include cardiovascular changes such as increased heart rate and blood pressure, cough, wheeze,<sup>8</sup> and mucus production.<sup>9</sup> Burn injuries have also been reported, as well as fatalities from drinking or injecting the e-liquid.<sup>8</sup>

There is no long-term data available on the relationship between ENDS and oral, respiratory, and cardiovascular health, as well as cancer. There is however available data linking the chemicals present in e-liquids with cellular DNA damage and carcinogenicity.<sup>9,10</sup> There is some evidence that the use of ENDS is associated with asthma exacerbations.<sup>11</sup> No human long-term data exist on the use of ENDS in pregnancy and their impact on the developing fetus.

Given the large number of smokers using ENDS as a potential smoking cessation tool, there is a need to review and synthesize the evidence of trials examining a head to head comparison of ENDS versus traditional NRT for smoking cessation.

### Objective

The objective of this review is to systematically review the evidence found in RCTs to determine the effect of electronic nicotine delivery systems (ENDS) on cigarette smoking cessation in smokers, as compared to other types of nicotine replacement therapies (NRT).



## METHODS

### Protocol and registration

The protocol for this systematic review was submitted to International Prospective Register of Systematic Reviews (PROSPERO) on February 27<sup>th</sup>, 2020 (registration pending) and uploaded as a preprint on Open Science Framework (OSF) Preprints on May 12<sup>th</sup> 2020.<sup>12</sup>

### Criteria for study inclusion

#### Study Characteristics:

RCTs in which ENDS were compared to non-electronic NRT in smokers were included. We restricted our inclusion to RCTs to minimize the risk of bias. No language limits were imposed. No date limits were imposed either, although we did not anticipate studies published prior to 2003, since this is when the first e-cigarette was invented.<sup>13</sup> There was no geographical restriction of studies.

#### Study Population:

All traditional cigarette users were included, regardless of age, amount of traditional cigarette use, and motivation to quit.

#### Intervention of interest:

The intervention of interest comprised all types, models, and brands of ENDS.

#### Comparators:

All included studies compared ENDS with non-electronic NRT. NRT comprised, but were not limited to, nicotine patch, gum, lozenge, nasal spray, inhalator, mouth spray, mouth strips, microtabs, and combination of products.

#### Outcome measures:

The primary outcome measure is traditional cigarette smoking cessation defined as abstinence from traditional cigarette smoking for any time period, as reported in each included study, regardless of whether abstinence is self-reported or biochemically validated.

Secondary outcomes include reduction in the number of traditional cigarettes smoked in any given time period, adverse events, withdrawal symptoms, and participants' acceptance of therapy. We had planned on collecting quit attempts information but none of the studies reported on this outcome.

#### Settings:

All health care and community settings were included.

### Study Identification

The following databases were searched: MEDLINE (1946 to June 2020), Embase (1947 to June 2020) and the CENTRAL Trials Registry of the Cochrane Collaboration (May 2020 Issue) using the Ovid interface. The MEDLINE search was limited using the Cochrane Highly Sensitive Search Strategy and the Embase search was limited using the recommended limit for controlled

1  
2  
3 trials.<sup>14</sup> Searches were developed by a librarian experienced in systematic reviews, using a  
4 method designed to optimize term selection.<sup>15</sup> ClinicalTrials.gov and World Health  
5 Organization International Clinical Trials Registry Platform (WHO ICTRP) trials registries were  
6 searched for registered intervention studies, regardless of their completion status. Electronic  
7 search strategies are presented in Supplementary Material 1. The reference lists of included  
8 studies and any applicable review studies were searched.  
9  
10

11 Authors of protocols identified through registries were contacted electronically, to request data  
12 for the review. In addition, clinical experts in the field of vaping and smoking cessation were  
13 contacted to enquire about any unpublished research fulfilling our inclusion criteria.  
14  
15

### 16 *Selection of Studies*

17 Records retrieved by the electronic search were downloaded and imported into a Reference  
18 Manager database for duplicate removal, and then uploaded to Covidence. Throughout the  
19 review, newly identified records were integrated into the set for screening.  
20  
21

22 Each title and abstract was independently screened by two review authors (from CP, JZ, and  
23 ATK) against the eligibility criteria.<sup>14</sup> Full text of all studies deemed potentially eligible was  
24 obtained and reviewed independently by two of the same review authors to determine  
25 eligibility. For screening, data extraction, and risk of bias assessment, disagreements were  
26 resolved by discussion, and with a third reviewer when needed.  
27  
28

### 29 *Data extraction and management*

30 For studies that fulfilled the inclusion criteria, two reviewers (CP, JZ) extracted the data into an  
31 electronic data collection form, which was piloted by both reviewers (Supplementary Material  
32 2). The data collection was revised, based on feedback from the reviewers. Study authors were  
33 contacted electronically to obtain relevant but unavailable data.  
34  
35  
36

### 37 **Risk of bias assessment for included studies**

38 Two reviewers (CP, JZ) independently conducted the risk of bias assessment for each study at  
39 the outcome level using the Revised Cochrane risk-of-bias tool for randomized trials (RoB 2).<sup>16</sup>  
40  
41

### 42 **Measures of treatment effect**

43 Dichotomous data was analyzed by calculating the risk ratio, using the longest follow-up time  
44 reported, as well as the 95% confidence interval. The risk ratio (RR) for smoking cessation was  
45 calculated as such:  
46  
47

$$48 \quad RR = \frac{N \text{ of subjects abstaining from smoking in intervention} / N \text{ of subjects in intervention}}{49 \quad N \text{ of subjects abstaining from smoking in control} / N \text{ of subjects in control}}$$

50  
51  
52  
53 Continuous data for the secondary outcomes were analyzed through mean differences  
54 between groups as the same scales were used. In the case of studies with multiple arms, we  
55 only extracted data for the groups relevant to this review.  
56  
57  
58  
59  
60

### Data synthesis

We provide a narrative synthesis of the included studies. Where appropriate, data have been pooled for meta-analyses, and random effects were used for all analyses in RevMan.<sup>14</sup> The inverse-variance random-effects and the mean difference approach (using standard deviations and sample sizes) were used for dichotomous and continuous outcomes, respectively, to assign the weight given to each study. Participants with missing data were considered as still smoking.<sup>5</sup> The proportion of adverse events reported was based on the number of people available for outcome assessment. For the reduction of the number of cigarettes smoked, missing values were assumed to be zero.

### Assessment of heterogeneity

A p value of 0.10 for the chi-squared test (Cochrane Q) and an  $I^2$  value of >50% were used as indicators of substantial heterogeneity. This however needs to be interpreted with caution given the small number of studies available for the meta-analysis. Clinical and methodological diversity was also explored.

We planned to assess reporting/publication bias using funnel plots of effect estimate against standard error, and testing for funnel plot asymmetry, however, the number of included studies was too low (<10).

We also planned on conducting a number of sensitivity analyses to determine the robustness of the results of the meta-analyses; subgroup analyses to investigate potentially modifying factors such as age and smoking intensity; as well as meta-regression to study the impact of covariates such as motivation to quit smoking, provision of training, and other factors,<sup>17</sup> but minimum data thresholds were not met.

We present a 'Summary of Findings' table for all outcomes. We used the five GRADE considerations (study limitations, consistency of effect, imprecision, indirectness, and publication bias)<sup>14</sup> to assess the quality of evidence for each outcome and to draw conclusions about the robustness of evidence within this review.

## RESULTS

Our initial bibliographic search yielded 270 records, and after screening and full-text review, we retained 6 RCTs. An updated search conducted in June 2020 yielded an additional 116 records (for a total of 386 records), none of which were included after screening (Figure 1).

We identified six RCTs (Bullen 2013,<sup>18</sup> Eisenhofer 2015,<sup>19</sup> Hajek 2019,<sup>4</sup> Hatsukami 2019,<sup>20</sup> Lee SH 2019,<sup>21</sup> Lee SM 2018<sup>22</sup>). Of these, five contributed data to our primary outcome of smoking cessation.<sup>4,18,20-22</sup> Four studies<sup>4,18,21,22</sup> examined cessation at 6 months or longer, while one<sup>20</sup> examined short term cessation (< 6 months). Table 1 includes the salient features of the

included studies. A more detailed description of included studies can be found in Supplementary Material Table 3.

**Table 1. Characteristics of included studies**

| <b>Characteristics of RCTs measuring smoking cessation at 6 months or later</b> |                                  |                   |                                                        |                                                                                             |                                         |                                                       |                                               |
|---------------------------------------------------------------------------------|----------------------------------|-------------------|--------------------------------------------------------|---------------------------------------------------------------------------------------------|-----------------------------------------|-------------------------------------------------------|-----------------------------------------------|
| <b>Author and year of publication</b>                                           | <b>Design</b>                    | <b>Country</b>    | <b>Number of participants</b>                          | <b>Main eligibility criteria</b>                                                            | <b>Intervention</b>                     | <b>Comparator</b>                                     | <b>Main outcome of interest</b>               |
| <b>Bullen, 2013<sup>17</sup></b>                                                | 3-group, parallel, single center | Australia         | 657 total, 584 included in this review (2 of 3 groups) | ≥ 18 years, smoked ≥ 10 cigarettes per day in the past year, motivated to quit              | First-generation e-cigarette x 12 weeks | Nicotine patch x 12 weeks                             | Continuous abstinence 6 months after quit day |
| <b>Hajek 2019<sup>4</sup></b>                                                   | 2-group, parallel, multi-centre  | United Kingdom    | 884                                                    | Adults with no strong preference towards e-cigarette or NRT                                 | Any type of e-cigarette                 | Any nicotine-replacement therapy                      | Continuous abstinence 52 weeks after quit day |
| <b>Lee SH, 2019<sup>20</sup></b>                                                | 2-group, parallel, single center | Republic of Korea | 150                                                    | ≥ 18 years, smoked ≥ 10 cigarettes per day in the past year, motivated to quit              | e-cigarette x 24 weeks                  | Nicotine gum x 24 weeks                               | Continuous abstinence 24 weeks after quit day |
| <b>Lee SM, 2018<sup>21</sup></b>                                                | 2 group, parallel, single center | USA               | 30                                                     | Adults, smoked ≥ 2 cigarettes per day in the past year, smoked at least once in last 7 days | e-cigarette x 6 weeks                   | Nicotine patch x 5 weeks, then placebo patch x 1 week | 7-day point prevalence abstinence at 6 months |
| <b>Characteristics of RCT measuring smoking cessation earlier than 6 months</b> |                                  |                   |                                                        |                                                                                             |                                         |                                                       |                                               |
| <b>Hatsukami, 2019<sup>19</sup></b>                                             | 4 group, parallel, multi-center  | USA               | 264 total, 152 included in this review (2 of 4 groups) | ≥ 18 years, smoked ≥ 5 cigarettes per day                                                   | e-cigarettes                            | Nicotine gum or nicotine lozenge                      | 7-day point prevalence abstinence at 8 months |
| <b>Characteristics of RCT measuring other outcomes</b>                          |                                  |                   |                                                        |                                                                                             |                                         |                                                       |                                               |

|                                      |                                  |     |    |                                                |                        |                          |                                                             |
|--------------------------------------|----------------------------------|-----|----|------------------------------------------------|------------------------|--------------------------|-------------------------------------------------------------|
| <b>Eisenhofer, 2015<sup>18</sup></b> | 2-group, parallel, single center | USA | 11 | Veterans who met criteria for tobacco disorder | e-cigarettes x 3 weeks | Nicotine patch x 3 weeks | Reduction in number of cigarettes smoked per day at 3 weeks |
|--------------------------------------|----------------------------------|-----|----|------------------------------------------------|------------------------|--------------------------|-------------------------------------------------------------|

### Risk of bias in included studies

We assessed risk of bias for each included study. A detailed report of the risk of bias assessment can be found in Supplementary Material Table 4.

Figures 2a, 2b, 2c, 2d, and 2e illustrate the risk of bias for each outcome.

### Effect of Interventions

#### Smoking cessation

Five of the six studies reported on smoking cessation.<sup>4,18,20-22</sup> When comparing e-cigarettes to NRT in the context of smoking cessation, there was no significant difference between groups in verified self-reported continuous abstinence at 6 months (21/289 vs 17/295, RR 1.26 [0.68, 2.34],  $p=0.46$ ) in the Bullen 2013<sup>18</sup> study, and in continuous abstinence from 9 to 24 weeks (16/75 vs 21/75, RR 0.76 [0.43, 1.34],  $p = 0.344$ ) in the Lee SH 2019<sup>21</sup> study. In addition, the Lee SM 2018<sup>22</sup> study showed no difference between groups for the 7-day point prevalence abstinence at 6 months in the context of perioperative smoking cessation (5/20 vs 1/10, RR 2.50 [0.34, 18.63],  $p = 0.63$ ).

In the Hajek 2019<sup>4</sup> study, self-reported, verified continuous abstinence at 1 year was found to be higher in the e-cigarette group (79/438 vs 44/446, RR 1.83 [1.30, 2.58],  $P<0.001$ ), and smoking cessation assessed by 7-day point prevalence at 8 weeks in the Hatsukami 2019<sup>20</sup> trial was also higher in the e-cigarette group (25/76 vs 13/76, RR 1.92 [1.07, 4.37],  $p = 0.039$ ).

We combined data from all 5 studies comparing smoking cessation between e-cigarettes and NRT and obtained a pooled RR of 1.42 [0.97, 2.09].

#### Smoking reduction

All six studies<sup>4,18-22</sup> assessed smoking reduction. Bullen 2013,<sup>18</sup> Eisenhofer,<sup>19</sup> Hajek 2019,<sup>4</sup> and Lee SM 2018<sup>22</sup> reported the proportion of participants reducing smoking by at least 50%. While Lee SH 2019<sup>21</sup> also reported on this outcome, the size of the reduction was not specified. Bullen 2013<sup>18</sup> and Lee SH 2019<sup>21</sup> reported an absolute reduction, and Hatsukami 2019<sup>20</sup> reported a relative reduction in cigarettes per day from baseline.

In the Bullen 2013 study,<sup>18</sup> mean cigarette consumption at 6 months decreased by 9.7 (SE 0.4) in the e-cigarette group, and by 7.7 (SE 0.4) in the NRT group. Mean difference between groups was 1.9 (SE 0.6) ( $p = 0.002$ ). After excluding people who successfully quit smoking, the RR of decreasing cigarette smoking by at least 50% when comparing the e-cigarette to the NRT groups was 1.61 [1.31, 1.99].

1  
2  
3 Eisenhofer 2015<sup>19</sup> compared week 3 to week 1, and showed that both e-cigarettes ( $t = 5.3$ ,  $p =$   
4 0.013) and NRT ( $t = 3.4$ ,  $p = 0.015$ ) significantly reduced (~50%) self-reports of cigarettes  
5 smoked in the previous 24 hours. This was confirmed by significant reductions of breath CO  
6 levels in both groups. No additional information could be obtained from the abstract and none  
7 of the authors could be reached.  
8  
9

10 In the Hajek 2019<sup>4</sup> study, 44 of 345 participants in the e-cigarette group, and 29 of 393  
11 participants in the NRT group experienced a carbon monoxide-validated reduction in smoking  
12 of  $\geq 50\%$  in participants without abstinence between weeks 26 and 52, yielding a relative risk of  
13 smoking reduction of 1.73 (1.11-2.70).  
14  
15

16 Hatsukami 2019<sup>20</sup> defined smoking reduction by the estimated ratio of cigarettes smoked at 8  
17 weeks as compared to baseline, with a result of 0.25 (0.17, 0.37) in the e-cigarette group, and  
18 0.29 (0.21, 0.39) in the NRT group ( $p = 0.185$ ). Additional data obtained from the author  
19 showed that 19 participants in the e-cigarette group and 22 participants in the NRT group  
20 reduced smoking consumption by 50% (RR 0.86 [0.51, 1.46]) at 8 weeks, and that mean  
21 cigarette consumption decreased by 9.22 (SD 7.95) in the e-cigarette group, and by 7.61 (SD  
22 8.27) in the NRT group. The mean difference between groups was 1.61 [-0.97, 4.19].  
23  
24  
25

26 In the Lee SH 2019<sup>21</sup> study, mean cigarette consumption decreased at 24 weeks by 6.5 +/- 2.87  
27 (SD) in the e-cigarette group, and by 6.60 +/- 3.75 (SD) in the NRT group ( $p = 0.974$ ). In  
28 addition, 31 out of 75 participants (41.3%) in the e-cigarette group and 19 out of 75 participants  
29 (25.3%) in the NRT group reduced their daily cigarette consumption ( $p = 0.038$ ), but no  
30 information on size of smoking reduction is provided. After excluding abstainers, a RR of 1.49  
31 [0.97, 2.31] was obtained for decrease in daily cigarette consumption.  
32  
33  
34

35 Lastly, in the Lee SM 2018,<sup>22</sup> 1 participant in the END group and 4 participants in the NRT group  
36 reduced their cigarette consumption by at least half, resulting in a RR 0.15 [0.02, 1.14].  
37  
38

39 We combined data from the Bullen 2013,<sup>18</sup> Hajek 2019,<sup>4</sup> Hatsukami 2019<sup>20</sup> and Lee SM 2018<sup>22</sup>  
40 studies comparing smoking reduction of at least 50% between e-cigarettes and NRT, as they  
41 used similar measures. Pooled results comparing the difference in smoking reduction between  
42 the e-cigarette and the NRT groups produced a RR of 1.25, with the line of equivalence falling  
43 within the confidence interval [0.79, 1.98].  
44  
45

46 We also combined data from the Bullen 2013,<sup>18</sup> Hatsukami 2019,<sup>20</sup> and Lee SH 2019<sup>21</sup>  
47 comparing mean reduction of cigarettes per day from baseline for ENDS and NRT (Figure 3c).  
48 Meta-analysis yielded a MD of 1.11, with the line of equivalence falling within the confidence  
49 interval [-0.41, 2.63].  
50  
51

### 52 Harms

53 Five studies reported on harms (Bullen 2013,<sup>18</sup> Hajek 2019,<sup>4</sup> Hatsukami 2019,<sup>20</sup> Lee SH 2019,<sup>21</sup>  
54 Lee SM 2018<sup>21</sup>). None of the included studies reported serious adverse events (SAEs) related to  
55 e-cigarettes or NRT.  
56  
57  
58  
59  
60

1  
2  
3  
4 In the Bullen 2013<sup>18</sup> study, 107 participants in the e-cigarette group reported 137 adverse  
5 events, while 96 participants in the NRT group (patches) reported 119 events, and, using the  
6 number of participants available for analysis at 6 months, there was no difference in the  
7 incidence of adverse events between groups (RR 0.99, [0.81, 1.22]). No difference between  
8 groups was also observed in the Hatsukami 2019<sup>20</sup> study, where additional data provided by the  
9 author showed that 51 of 69 participants in the e-cigarette group and 53 of 72 participants in  
10 the NRT group reported adverse events (1.00 [0.82, 1.22]), and in the Lee SM 2018<sup>22</sup> study,  
11 where no significant difference in the incidence of adverse events between groups was seen at  
12 8 weeks (RR 1.24 [0.54, 2.84]).  
13  
14  
15

16  
17 Hajek 2019<sup>4</sup> defined adverse events of interest as nausea, sleep disturbances, and throat and  
18 mouth irritation. There were 27 SAEs in the e-cigarette group and 22 in the NRT group, none  
19 felt to be related to the intervention or control products. Based on the number of participants  
20 available at the 12 month follow-up, e-cigarettes were found to be less likely associated with  
21 nausea (RR 0.78 [0.66, 0.92]) and sleep disturbances (RR 0.88 [0.83, 0.95]), but more likely  
22 associated with throat/mouth irritation (RR 1.24 [1.13, 1.37]). These numbers however should  
23 be interpreted with caution as it was not possible to determine with certainty the denominator  
24 from the data.  
25  
26

27  
28 In the Lee SH 2019 study,<sup>21</sup> 5 participants in the e-cigarette group and 13 participants in the  
29 nicotine gum group reported adverse events. There were no SAEs. Based on the number of  
30 participants who completed the study, e-cigarettes were less likely to be associated with  
31 adverse events (RR 0.13 [0.12, 0.87]).  
32  
33

34 We combined data from the Bullen 2013,<sup>18</sup> Hatsukami 2019,<sup>20</sup> Lee SH 2019,<sup>21</sup> Lee SM 2018<sup>22</sup>  
35 studies comparing harms between e-cigarettes and NRT. Hajek 2019<sup>4</sup> was excluded as they did  
36 not clearly report the number of participants that experienced any adverse events and reported  
37 only on specific adverse events. Pooled results comparing ENDS to NRT yielded a RR of 0.96  
38 [0.76, 1.20].  
39  
40

#### 41 Withdrawal symptoms

42 Four studies reported on the results of withdrawal symptoms (Eisenhofer 2015,<sup>19</sup> Hajek 2019,<sup>4</sup>  
43 Hatsukami 2019,<sup>20</sup> and Lee SM 2018<sup>22</sup>) and all used different scales. Eisenhofer 2015<sup>19</sup> assessed  
44 withdrawal with the Questionnaire on Smoking Urges (QSU), Hajek<sup>4</sup> used a composite urge  
45 score (frequency and strength of urge to smoke), Hatsukami 2019<sup>20</sup> measured the severity of  
46 withdrawal using the Minnesota Nicotine Withdrawal Scale, and Lee SM 2018<sup>21</sup> assessed  
47 withdrawal symptoms as part of their adverse event assessment. In light of the differences in  
48 outcome assessment measures, the data were not pooled.  
49  
50

51  
52 In Eisenhofer 2015,<sup>19</sup> urges and cravings to smoke were significantly reduced in the e-cigarette  
53 group (t=3.8, p = 0.03), but not in the NRT group (t=2.1, p = 0.08).  
54  
55  
56  
57  
58  
59  
60

1  
2  
3 In Hajek 2019,<sup>4</sup> urges for e-cigarette users decreased more than for NRT users at 1 week (MD: -  
4 0.4 (-0.6 to -0.2)) and at 4 weeks (MD: -0.3 (-0.5 to -0.1)). E-cigarette users also reported a  
5 smaller increase from baseline in irritability, restlessness, inability to concentrate, hunger, and  
6 depression. The withdrawal symptoms disappeared mostly for both groups by week 4.  
7  
8

9 In Hatsukami 2019,<sup>20</sup> participants in the e-cigarette group reported lower median [min/max]  
10 changes from baseline on the severity scale compared to participants in the NRT group at all  
11 measurement points, with week 1 (3.0 [-9.0/25.0] vs 3.5 [-20.0/32.0]), week 2 (1.0 [-13.0/25.0]  
12 vs 3.0 [-13.0/39.0]), and week 4 (1.0 [-17.0/30.0] vs 2.5 [-28.0/29.0]). The planned pairwise  
13 comparisons were significant with  $p < 0.017$ . As well, fewer participants (5.3%) withdrew from  
14 the complete substitution e-cigarettes group than from the NRT group (15.8%) for product  
15 related reasons (disliking product or experiencing withdrawal symptoms;  $p$  value not reported).  
16  
17  
18

19 Lee SM 2018<sup>22</sup> only reported on withdrawal symptoms for the NRT group, and did not report on  
20 withdrawal symptoms for the e-cigarette group.  
21  
22

### 23 Acceptance of therapy

24 Four studies reported on acceptance of therapy (Bullen 2013,<sup>18</sup> Hajek 2019,<sup>4</sup> Hatsukami 2019,<sup>20</sup>  
25 and Lee SM 2018<sup>22</sup>), and all used different scales. In light of the difference in outcome  
26 assessment measures, the data were not pooled.  
27  
28

29 In the Bullen 2013<sup>18</sup> study, 230 out of 260 participants (88%) in the e-cigarettes group said they  
30 would recommend their allocated product to a friend at 1 month, as compared to 130 out of  
31 232 participants (56%) in the NRT group (RR 1.58 [1.40, 1.78]). At 6 months, 205 out of 241  
32 participants (85%) in the e-cigarettes group said they would recommend their allocated product  
33 as compared to 107 out of 215 participants (50%) in the NRT group (RR 1.71 [1.48, 1.97]).  
34  
35

36 In the Hajek 2019 study,<sup>4</sup> acceptance of therapy was measured with a Likert scale (1 to 5, with a  
37 higher score associated with higher acceptance). At 4 weeks post quit date, helpfulness of e-  
38 cigarettes was rated 4.3 (SD 0.9) while that of NRT was 3.7 (SD 0.9) (mean difference 0.6 (0.4,  
39 0.7)). Taste was scored at 3.5 (SD 1.3) for the e-cigarette group and 3.1 (SD 1.5) (mean  
40 difference 0.4 (0.2, 0.6)), and satisfaction was rated at 2.7 (SD 1.1) and 2.3 (SD 1.2), respectively,  
41 for the e-cigarette and NRT groups (mean difference 0.5 (0.3, 0.6)).  
42  
43

44 In the Hatsukami 2019 study<sup>20</sup>, acceptance of therapy was defined as satisfaction with the  
45 product, psychological reward, enjoyment of sensation, aversion, and ability to reduce craving.  
46 Results are reported for the NRT group as an estimated mean difference and 95% CI in product  
47 evaluation sub-scales using the e-cigarette group as a reference. The following results are  
48 reported; satisfaction: -0.6 (-1.0, -0.1), psychological reward: -0.4 (-0.8, 0.01), enjoyment of  
49 sensation: -0.6 (-1.1, -0.1), aversion: 0.1 (-0.2, 0.4), and ability to reduce craving: -0.3 (-0.8, 0.2).  
50  
51  
52

53 Lastly, the Lee SM 2018 trial<sup>22</sup> defined acceptance of therapy as satisfaction with the assigned  
54 product, measured with a Likert scale (1 to 7, with a higher score associated with higher  
55 satisfaction). Median scores and IQR are reported. Participants randomized to the e-cigarette  
56  
57  
58  
59  
60



1  
2  
3 group reported scores of 6 [4-7], 5.5 [2.5-7], and 6 [5-7], respectively, while participants  
4 randomized to the NRT group reported scores of 5 [3-7], 5 [3-6], and 7 [6-7], respectively for  
5 the following questions. "The product is helpful for quitting smoking", "I was satisfied with the  
6 product to help with quitting", "I would recommend the product to someone interested in  
7 quitting smoking".  
8  
9

### 10 **Risk of bias across studies**

11 The review process we used was thorough, and we took every precaution to minimize the risk  
12 of bias due to publication bias or selective reporting. We reached out to clinical experts to  
13 enquire about unpublished reports, examined protocol registries, and contacted the authors of  
14 identified protocols to request unpublished results. Given the low number of retained studies,  
15 we did not include a funnel plot.  
16  
17

### 18 **Sensitivity, subgroup and meta-regression analyses**

19 We performed a sensitivity analysis for the smoking cessation outcome by removing the Lee SM  
20 2018 study<sup>22</sup>. While the other 4 studies aimed to assess smoking cessation in general, Lee et al  
21 were targeting a peri-operative population, who may have had different motivations to quit  
22 smoking. The pooled data, once Lee SM 2018<sup>22</sup> is removed, yield a RR of smoking abstinence of  
23 1.39 [0.92, 2.11] when comparing ENDS to NRT (Figure 4a).  
24  
25  
26

27 We had planned on undertaking multiple subgroup analyses. We were unable to perform the  
28 subgroup analyses based on age (all participants were adults), smoking intensity (no study  
29 enrolled smokers  $\geq 25$  cigarettes per day), or biochemically validated smoking cessation (all  
30 studies used biochemical validation). We also could not perform a subgroup analysis of studies  
31 with ties to industry as only Bullen 2013<sup>18</sup> was found to have ties to the vaping industry.  
32  
33  
34

35 We did, however, perform the following subgroup analyses: limiting comparator to nicotine  
36 patches (Bullen 2013<sup>18</sup> and Lee SM 2018<sup>21</sup>), and including only studies assessing  
37 continuous/sustained smoking abstinence  $\geq 6$  months given that smoking cessation is defined  
38 as sustained abstinence for at least 6 months;<sup>23</sup> (Bullen 2013,<sup>18</sup> Hajek 2019,<sup>4</sup> Lee SH 2019<sup>21</sup>)  
39 (Figures 4b and 4c, respectively).  
40  
41

42 Metaregression analyses were not performed as our threshold of 10 eligible studies was not  
43 met.  
44  
45  
46

## 47 **DISCUSSION**

48 In our review, there was no significant difference in smoking cessation, smoking reduction, or  
49 harms between e-cigarette and NRT users. However, we report on results from a limited  
50 number of RCTs, and the level of evidence is low. Our efficacy results are similar to those  
51 described in a 2016 Cochrane review,<sup>5</sup> which also showed no difference between abstinence  
52 rates between the nicotine e-cigarette group and NRT group. Their review only included one  
53 study<sup>18</sup>, also included in our review for this particular outcome. Similar to the evidence we are  
54  
55  
56  
57  
58  
59  
60

1  
2  
3 presenting, none of the studies examined in the Cochrane review reported serious adverse  
4 events considered to be related to e-cigarette use.  
5

6  
7 Although our meta-analysis of the 5 trials that examined **smoking cessation** showed no  
8 significant difference between e-cigarette and nicotine replacement therapy, there was a trend  
9 towards favoring e-cigarettes. Interestingly, our sensitivity analysis limiting inclusion to studies  
10 reporting smoking cessation of 6 months or greater yielded a smaller point estimate than the  
11 one obtained from the main analysis, although still with no difference between groups. It could  
12 be hypothesized that additional benefits that may be attributed to e-cigarette early on in  
13 smoking cessation may be attenuated as time progresses. This again should be interpreted  
14 with caution given the small number of studies<sup>4,18,20</sup> and the very significant heterogeneity.  
15  
16

17  
18 In all comparisons, our results need to be interpreted carefully. There was significant clinical  
19 heterogeneity between studies in terms of the population enrolled, smoking intensity at  
20 baseline, type and nicotine concentration of e-cigarettes, type and dose of NRT, as well as  
21 methodological heterogeneity in terms of study conduct, and intervention and control  
22 protocols. For instance, one of the included studies<sup>18</sup> used first-generation e-cigarettes, with  
23 nicotine delivery about 20% of that obtained from cigarette smoking. While e-cigarette users  
24 were couriered the supplies needed, NRT users had to redeem vouchers from community  
25 pharmacies to obtain their patches. The low nicotine content of the e-cigarettes, the extra step  
26 in obtaining NRT supplies, and the low intensity of additional co-interventions likely contributed  
27 to the low rate of smoking abstinence at 6 months in both groups, limiting the generalizability  
28 of the results. Another included study<sup>4</sup> allowed for multiple types and concentrations of ENDS,  
29 as well as upwards of 10 NRT products and doses, complicating the interpretation of the  
30 results. Nicotine concentrations reported in the trials ranged from 0.01 to 48 mg/mL,<sup>4,18,20-22</sup>  
31 making comparisons between studies difficult.  
32  
33  
34  
35

36 Given that the risk of bias was assessed as high in 5 of 6 included studies<sup>4,18-21</sup>, our smoking  
37 cessation outcome results need to be interpreted with caution. In addition, it is interesting to  
38 note that all studies verified self-reported smoking cessation with an exhaled carbon monoxide  
39 test, however different cut-off values were used. Additionally, there are limitations to using  
40 carbon monoxide (CO) as a way to verify smoking cessation. CO has a relatively short half-life  
41 and is eliminated from the body within 24 hours; it can, therefore, lead to false negative results.  
42 However, this issue is somewhat mitigated by the fact that smoking cessation study participants  
43 tend to be daily smokers.  
44  
45  
46

47 All studies included in this review examined **smoking reduction**. There was no difference  
48 between groups in the mean reduction of cigarettes from baseline in the studies that measured  
49 that outcome, or in the proportion of participants successfully reducing their smoking  
50 consumption.  
51  
52

53 None of the included studies reported severe **adverse events** related to ENDS or NRT, and, for  
54 the four studies with data that could be pooled, there was no difference between groups in  
55 terms of harms related to either therapy. However, in addition to the clinical heterogeneity  
56  
57  
58  
59  
60

1  
2  
3 mentioned above, there was significant methodological heterogeneity in how adverse events  
4 were collected. We evaluated the quality of the evidence as very low, given the high risk of bias  
5 of included studies, the significant heterogeneity, and the inability to accurately determine the  
6 number of subjects involved in this outcome, thus leading to result imprecision.  
7  
8

9  
10 Since the included trials were powered to detect a difference in the primary outcome, it is  
11 possible that rare or unexpected harms were not detected due to a lack of power for this  
12 specific outcome. Also, it is important to acknowledge that these studies are limited by their  
13 short time-frame. Data on long-term side effects of ENDS are lacking. The recent e-cigarette, or  
14 vaping product use-associated lung injury (EVALI) epidemic, is a reminder that further research  
15 is needed before widespread recommendations can be made with regards to the use of  
16 ENDS. In addition, there are now emerging concerns that respiratory disease caused by the  
17 novel coronavirus SARS-CoV-2, the virus responsible for the COVID-19 pandemic, could be  
18 exacerbated by exposure to ENDS.<sup>24-26</sup>  
19  
20

21  
22 Finally, although there seemed to be **increased acceptance of therapy** towards e-cigarettes in  
23 the four studies that considered it,<sup>4,18,20,22</sup> high risk of bias, significant heterogeneity, and the  
24 small number of studies using widely different scales leading to imprecise measures, mean that  
25 the results should be interpreted with extreme caution. In addition, given that the trials were  
26 unblinded, participants who were disappointed with their treatment allocation may have  
27 reported less acceptability than their counterparts.  
28  
29

### 30 **Limitations at review level**

31 We restricted our search to RCTs to try to minimize the risk of bias, however, this considerably  
32 limited the number of available studies for this review. It is surprising that, given the  
33 widespread availability of e-cigarettes and how aggressively they have been marketed as  
34 smoking cessation agents, there are so few head-to-head trials comparing ENDS and traditional  
35 NRT. While there may be some unpublished studies that our review did not capture, our  
36 literature search was thorough and included personal communications to multiple experts in  
37 the field.  
38  
39

40  
41 Our review identified 7 ongoing trials<sup>27-33</sup> that potentially met our inclusion criteria, totaling  
42 over 1500 targeted participants. None of the investigators had any data ready to be shared,  
43 however it is hoped that this ongoing research can shed light on the effectiveness of ENDS as  
44 smoking cessation tools, as compared to traditional NRTs. Long-term research is also needed to  
45 investigate the long-term effects of ENDS, as well as the optimal dosing and method of  
46 delivery.  
47  
48

### 49 **Conclusion**

50 We found no difference in smoking cessation, harms, and smoking reduction between e-  
51 cigarette and NRT users. However, the quality of the evidence was low. Further research is  
52 needed before widespread recommendations can be made with regards to the use of ENDS.  
53 Research is also needed to investigate the long-term effects of ENDS, as well as optimal dosing.  
54  
55  
56  
57  
58  
59  
60

**Acknowledgements**

We thank Katie O'Hearn, MSc, (Children's Hospital of Eastern Ontario Research Institute), Dr Matthew McInnes, and Dr Dean Fergusson (University of Ottawa), for methodological assistance.

**Data sharing**

Data collection forms and all raw data can be requested through the corresponding author.

For peer review only

## REFERENCES

1. Government of Canada. Canadian Tobacco, Alcohol and Drugs Survey (CTADS): summary of results for 2017. <https://www.canada.ca/en/health-canada/services/canadian-tobacco-alcohol-drugs-survey/2017-summary.html#n2> (accessed June 30, 2020)
2. Caponnetto P, Campagna D, Papale G, Russo C; Polosa R. The emerging phenomenon of electronic cigarettes. *Expert Rev Respir Med.* 2012; 6: 63–74.
3. Kalkhoran, Sara; Glantz, Stanton A. E-cigarettes and smoking cessation in real-world and clinical settings: a systematic review and meta-analysis. *Lancet Resp Med.* 2016; 4: 116–128.
4. Hajek P, Phillips-Waller A, Przulj D, Pesola F, Myers Smith K, et al. A Randomized Trial of E-Cigarettes versus Nicotine-Replacement Therapy. *N Engl J Med* 2019; 380: 629-637
5. Hartmann-Boyce J, McRobbie H, Bullen C, Begh R, Stead LF, Hajek P. Electronic cigarettes for smoking cessation. *Cochrane Database Syst Rev.* 2016; 14:9: CD010216
6. Centers for Disease Control and Prevention. Smoking & Tobacco use. Outbreak of Lung Injury Associated with E-Cigarette Use, or Vaping [https://www.cdc.gov/tobacco/basic\\_information/e-cigarettes/severe-lung-disease.html#latest-outbreak-information](https://www.cdc.gov/tobacco/basic_information/e-cigarettes/severe-lung-disease.html#latest-outbreak-information) (accessed June 30, 2020)
7. Government of Canada. Severe lung illness related to vaping. <https://www.canada.ca/en/public-health/services/diseases/vaping-pulmonary-illness.html> (accessed June 30, 2020)
8. National Academies of Sciences, Engineering, and Medicine. 2018. Public health consequences of e-cigarettes. Washington, DC: The National Academies Press.
9. Gotts JE, Jordt SE, McConnell R, Tarran R. What are the respiratory effects of e-cigarettes? *BMJ* 2019; 366: I5275
10. Schober W, Szendrei K, Matzen W, Osiander-Fuchs H, Heitmann D, et al. Use of electronic cigarettes (e-cigarettes) impairs indoor air quality and increases FeNO levels of e-cigarette consumers. *In t J Hyg Environ Health.* 2014; 217: 628-637
11. Bhatti DN, Glantz SA. Association of E-cigarette Use with Respiratory Disease Among Adults: A Longitudinal Analysis. *Am J Prev med.* 2020; 58:182.190.
12. Pound CM, Zhang J, Kodua AT, Sampson M. Smoking cessation in individuals who use vaping as compared to traditional nicotine replacement therapies; protocol for a systematic review and meta-analysis. <https://osf.io/mw4vr/>
13. Caponnetto P, Campagna D, Papale G, Russo C; Polosa R. The emerging phenomenon of electronic cigarettes. *Expert Rev Respir Med.* 2012; 6: 63–74.
14. Higgins J, Green S. (2019). *Cochrane Handbook for Systematic Reviews of Interventions.* John Wiley & Sons Ltd.
15. Bramer WM, De Jonge GB, Rethlefsen ML, Mast F, Kleijnen J. A systematic approach to searching: an efficient and complete method to develop literature searches. *J Med Libr Assoc.* 2018;106(4):531–41

16. Sterne JAC, Savović J, Page MJ, Elbers RG, Blencowe NS, et al. RoB 2: a revised tool for assessing risk of bias in randomised trials. *BMJ* 2019; 366: l4898.
17. Glanville JM, Duffy S, McCool R, Varley D. Searching ClinicalTrials.gov and the International Clinical Trials Registry Platform to inform systematic reviews: What are the optimal search approaches? *J Med Libr Assoc.* 2014;102(3):177-83.
18. Bullen C, McRobbie H, Laugesen M, McRobbie H, Parag V et al. Electronic cigarettes for smoking cessation: a randomised controlled trial. *Lancet* 2013; 382 (9905):1629-37.
19. Eisenhofer J, Makanjuola T, Martinez V, Thompson-Lake DG, Rodgman C, et al. Efficacy of electronic cigarettes for smoking cessation in veterans. CPDD 77<sup>th</sup> Annual Meeting Abstracts. *Drug Alcohol Depend.* 2015; 156:e2-e101.
20. Hatsukami D, Meier E, Lindgren BR, Anderson A, Reisinger S, et al. A Randomized Clinical Trial Examining the Effects of Instruction for Electronic Cigarette Use on Smoking-Related Behaviors, and Biomarkers Exposure, *Nicotine Tob Res* 2019 Dec 12 [Online ahead of print].
21. Lee SH, Ahn SH, Cheong YS. Effect of Electronic Cigarettes on Smoking Reduction and Cessation in Korean Male Smokers: A Randomized Controlled Study. *J Am Board Fam Med.* 2019; 32(4): 567-574.
22. Lee SM, Tenney R, Wallace AW, Arjomandi M. E-cigarettes versus nicotine patches for perioperative smoking cessation: a randomized trial. *PeerJ.* 2018; 6:e5609.
23. Maseeh A, Kwatra G. A review of Smoking Cessation Interventions. *MedGenMed.* 2005;7:24.
24. McAlinden KD, Eapen MS, Lu W, Chia C et al. COVID-19 and Vaping: Risk for Increased Susceptibility to SARS-CoV-2 Infection? *Eur Resp J.* 2020; 2001645.
25. Kaur G, Lungarella G, Rahman I. SARS-CoV-2 COVID-19 Susceptibility and Lung Inflammatory Storm by Smoking and Vaping. *J Inflamm (Lond).* 2020;17:21.
26. Singh AG, Chatirvedi P. Tobacco use and vaping in the COVID-19 era. *Head Neck.* 2020;42(6):1240-1242.
27. ACTRN12617000849392. The QuitNic Study: A pilot study of electronic nicotine devices for smoking cessation with drug and alcohol clients
28. ISRCTN13288677. Can electronic cigarettes and nicotine replacement treatment help reduce smoking in smokers who struggle to quit?
29. ISRCTN62025374. Helping pregnant smokers quit: a multi-centre study of electronic cigarettes and nicotine patches
30. ACTRN12617001324303. Comparing electronic-cigarettes to traditional oral nicotine replacement therapy for smoking cessation among low-socioeconomic status smokers: a randomised controlled trial
31. NCT03249428. E-Cigarette Inner City NRT
32. ACTRN12619001787178. Project NEAT: nicotinE As Treatment for tobacco smoking following discharge from residential withdrawal services
33. NCT04236791. The ESTxENDS Trial- Electronic Nicotine Delivery Systems as an Aid for Smoking Cessation-extension of Follow-up

Figure 1. Study flow diagram

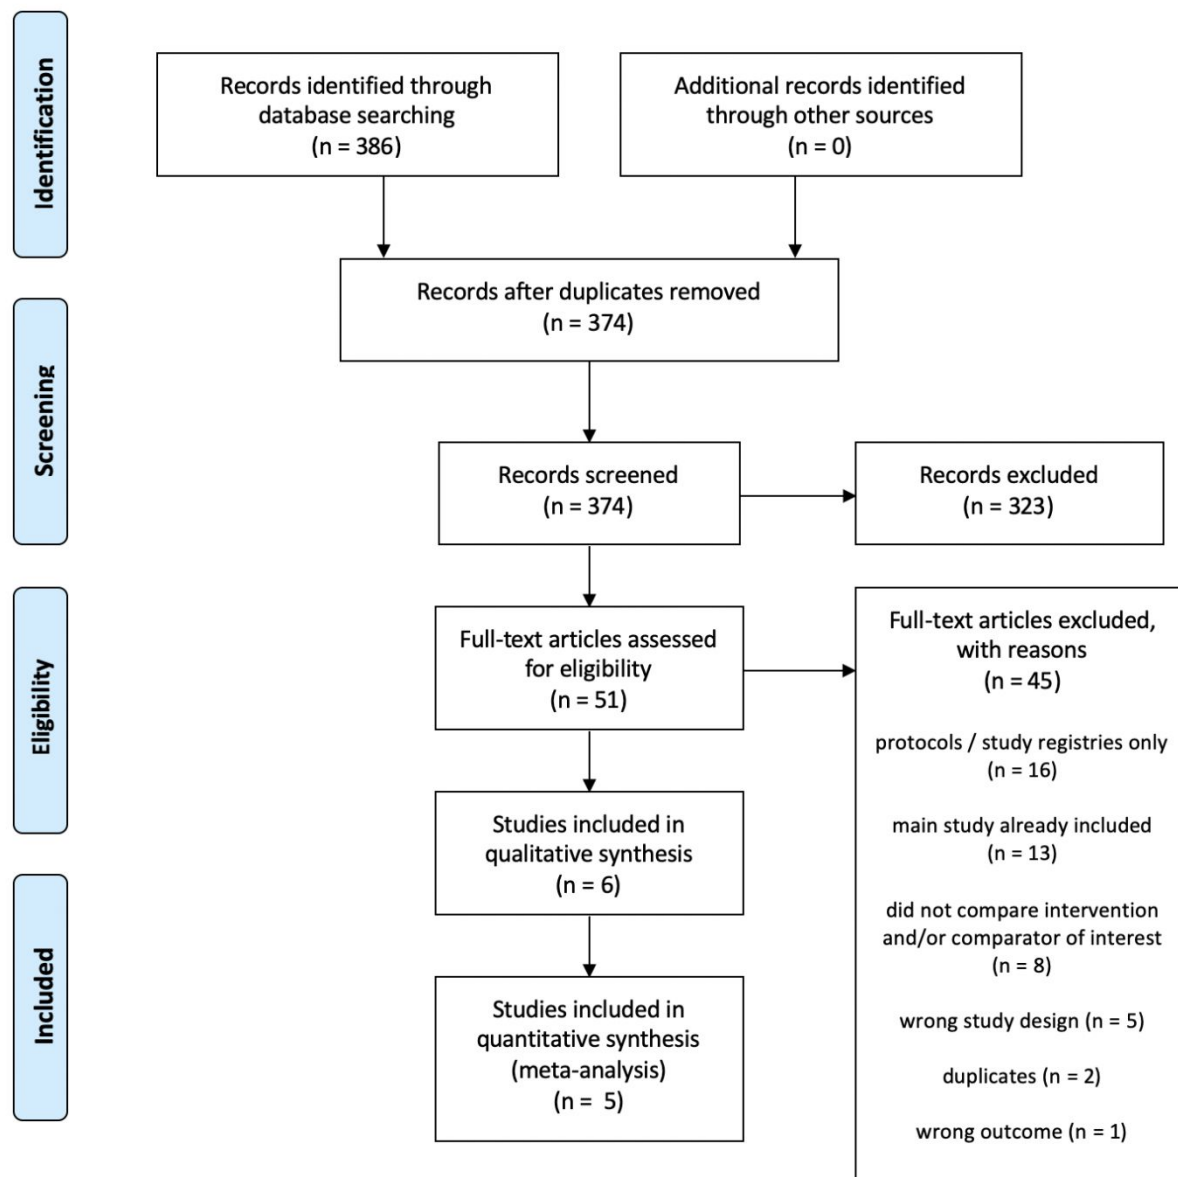

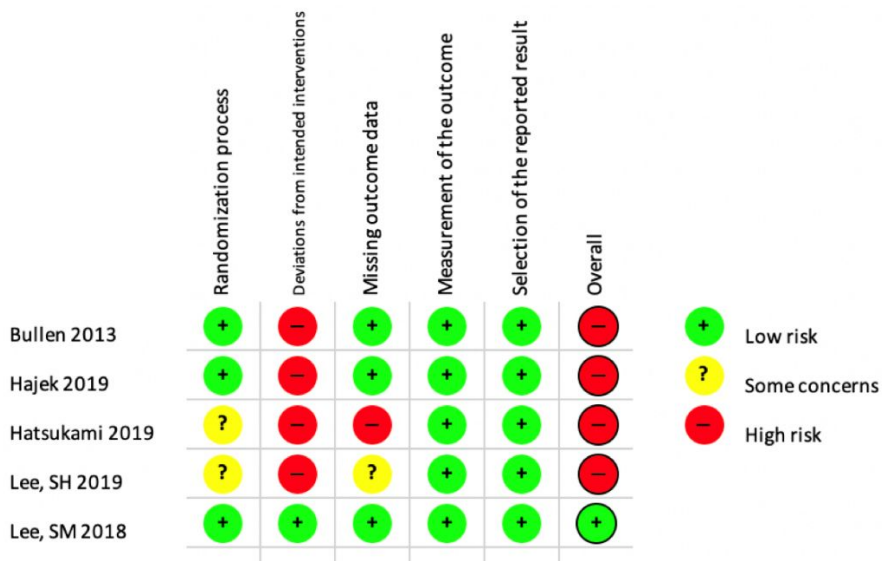

**Figure 2a**  
**Risk of bias for smoking cessation outcome**

Peer review only



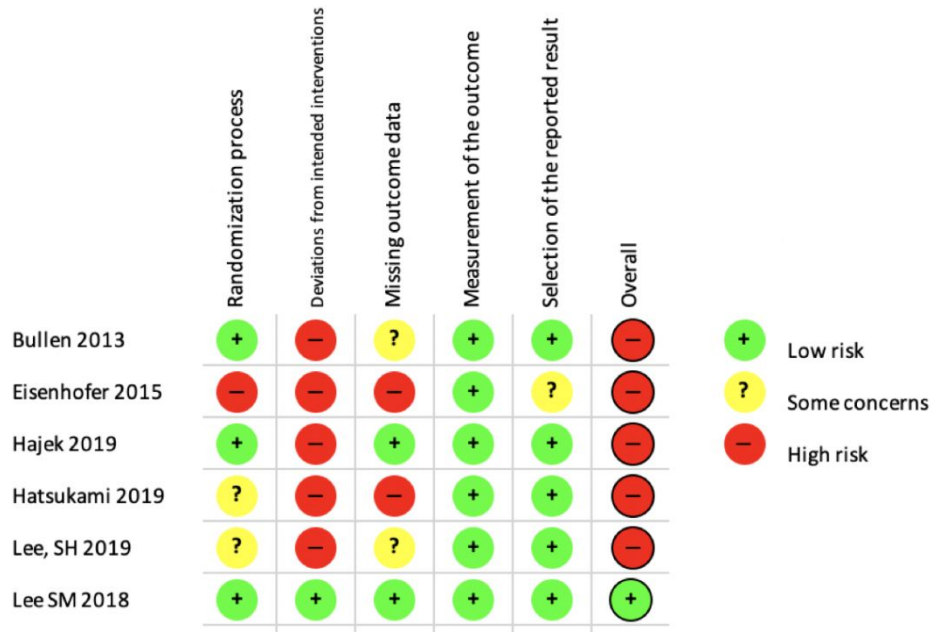

23  
24  
25  
26  
27  
28  
29  
30  
31  
32  
33  
34  
35  
36  
37  
38  
39  
40  
41  
42  
43  
44  
45  
46  
47  
48  
49  
50  
51  
52  
53  
54  
55  
56  
57  
58  
59  
60

**Figure 2b**  
Risk of bias for smoking reduction outcome

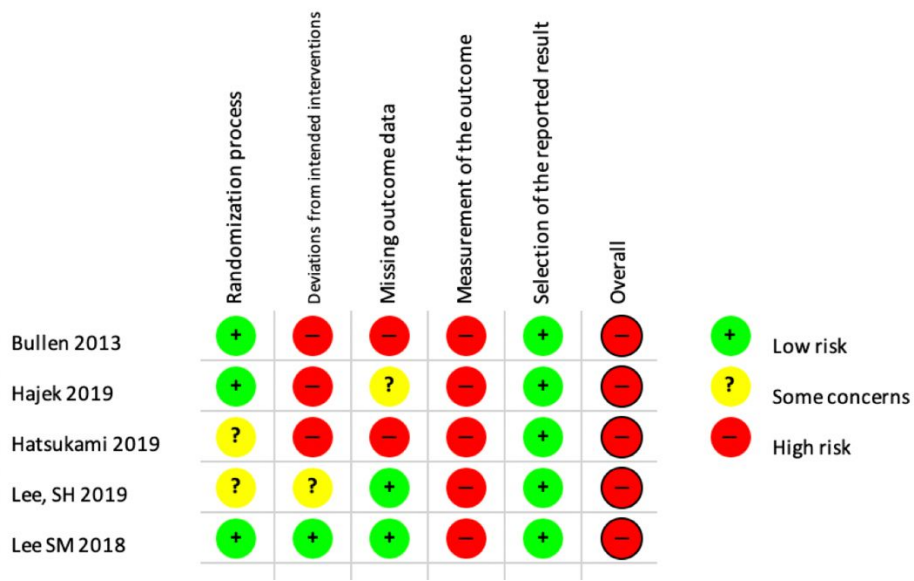

**Figure 2c**  
**Risk of bias for harms outcome**

Peer review only

|                 | Randomization process | Deviations from intended interventions | Missing outcome data | Measurement of the outcome | Selection of the reported result | Overall |            |
|-----------------|-----------------------|----------------------------------------|----------------------|----------------------------|----------------------------------|---------|------------|
| Eisenhofer 2015 | ⊖                     | ⊖                                      | ⊖                    | ⊖                          | ?                                | ⊖       | ⊕ Low risk |
| Hajek 2019      | ⊕                     | ⊖                                      | ⊖                    | ⊖                          | ⊕                                | ⊖       | ⊕ Low risk |
| Hatsukami 2019  | ?                     | ⊖                                      | ⊖                    | ⊖                          | ?                                | ⊖       | ⊕ Low risk |
| Lee SM, 2018    | ⊕                     | ⊕                                      | ⊕                    | ⊖                          | ⊕                                | ⊖       | ⊕ Low risk |

⊕ Low risk  
 ? Some concerns  
 ⊖ High risk

**Figure 2d**  
**Risk of bias for withdrawal symptoms outcome**

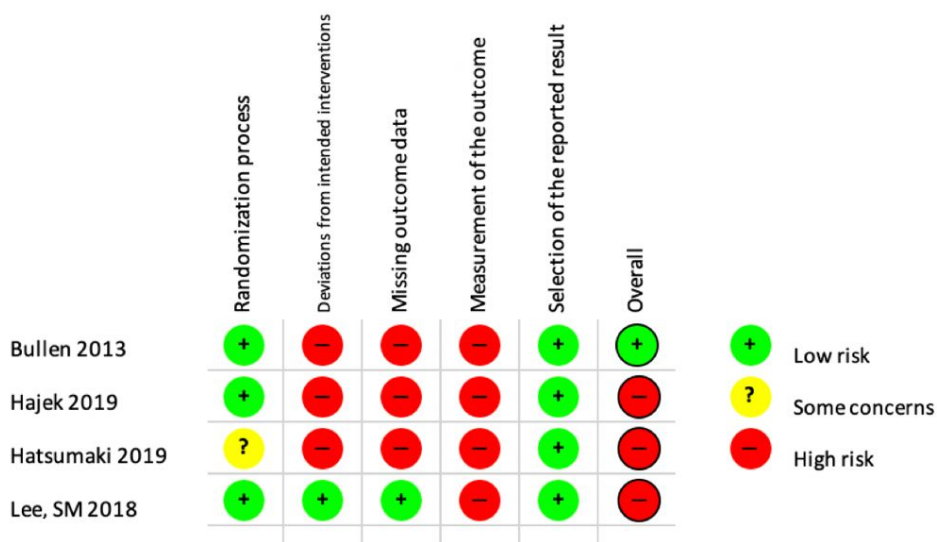

**Figure 2e**  
**Risk of bias for acceptance of therapy outcome**

Peer review only

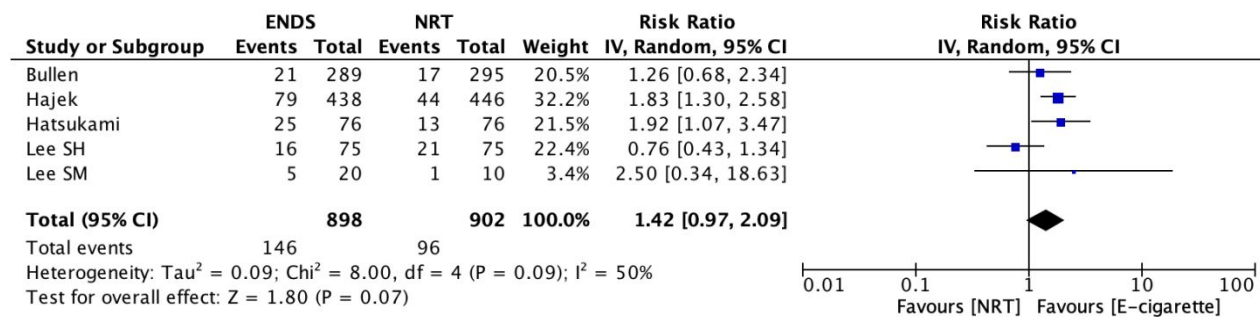

Figure 3a Smoking cessation

For peer review only

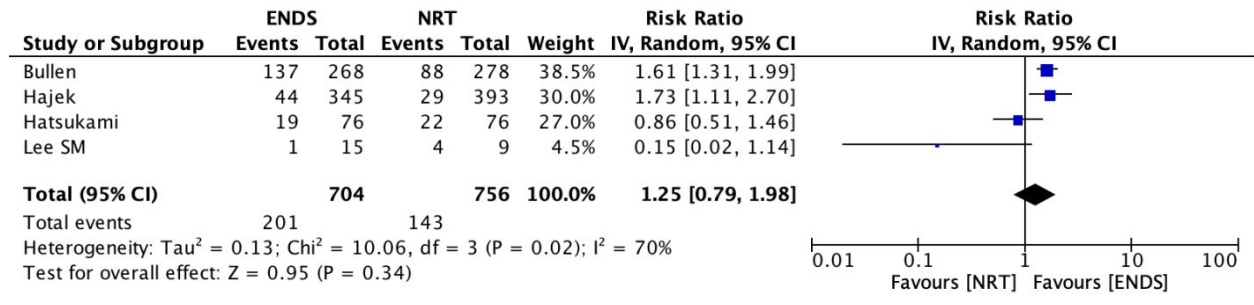

**Figure 3b Proportion of participants successfully reducing smoking consumption by 50%**

For peer review only

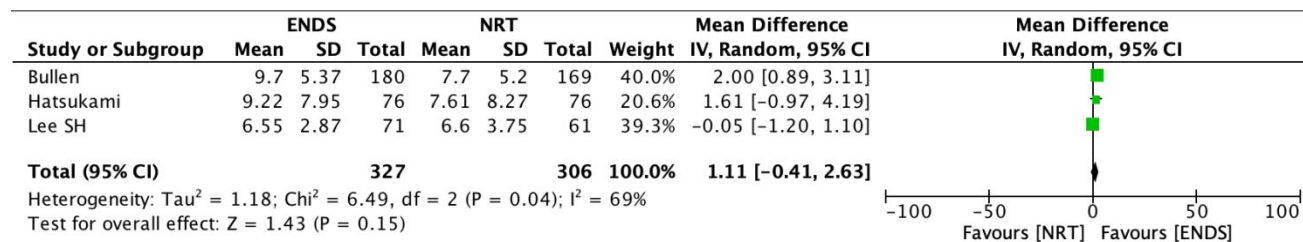

Figure 3c Mean reduction of cigarettes from baseline

For peer review only

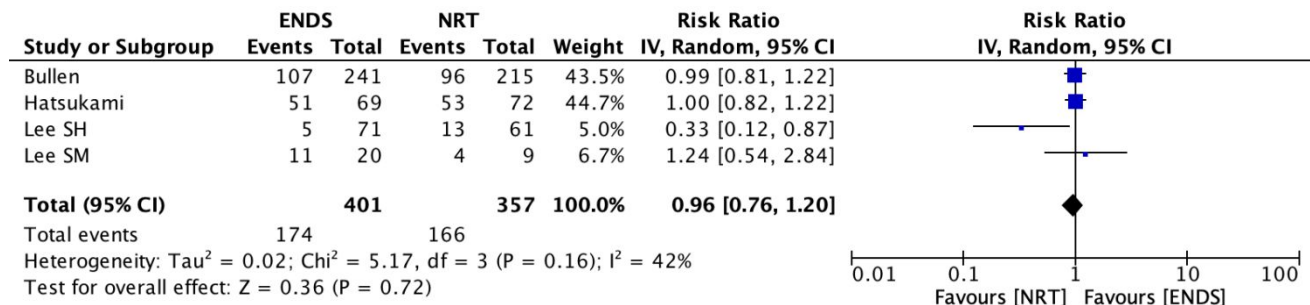

Figure 3d Proportion of participants experiencing adverse events

For peer review only



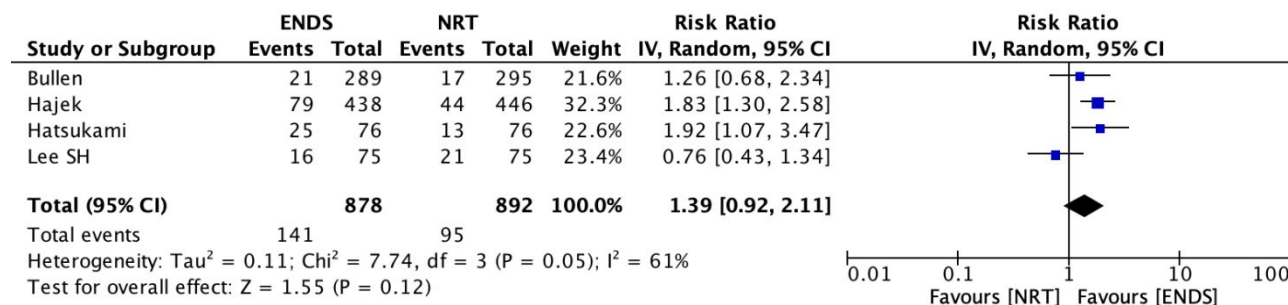

**Figure 4a Sensitivity Analysis—Smoking cessation, for studies examining smoking cessation in the general population**

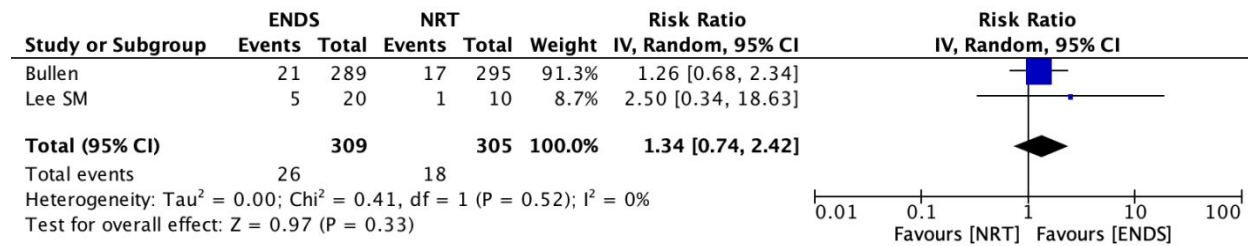

Figure 4b Subgroup Analysis—Smoking cessation, comparing e-cigarettes to nicotine patches only

For peer review only

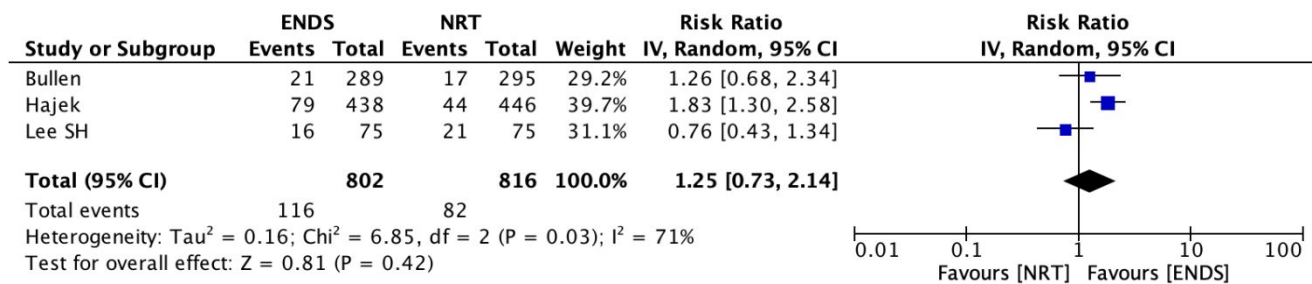

Figure 4c Subgroup Analysis— Continuous/sustained abstinence, 6 months and greater only

For peer review only

## Supplementary Material 1

### Search strategies

MEDLINE, Embase, CENTRAL

Note: Searches were conducted using an Ovid multi-database search and duplicate records were removed online giving preference to MEDLINE, then Embase, with no field preference. Lines 1-3 are optimized for MEDLINE and the main question constructs are broken out in separate lines for clarity. Lines 4-7 are optimized for Embase and lines 8-10 are optimized for CENTRAL. The next lines isolate the records to the database the search was designed for, combine those sets and then remove duplicate records and final isolate the records from each database again so each can be downloaded and imported into the citation manager using a database-specific import filter.

1. Electronic Nicotine Delivery Systems/ or (e cig\* or electr\* cigar\* or electronic nicotine).mp. or (vape or vaper or vapers or vaping or non-combustible nicotine-containing product).ti,ab,kf.
2. exp "Tobacco Use Cessation Devices"/ or NRT.ti,ab,kf. or (nicotine adj2 (patch\* or gum or nasal spray or mouth spray or mouth strips or lozenge\* or tablet\* or microtab\* or sublingual or replac\*)).mp. or (nicotine adj3 therapy).mp.
3. (1 and 2 and ((randomized controlled trial or controlled clinical trial).pt. or randomized.ab. or placebo.ab. or drug therapy.fs. or randomly.ab. or trial.ab. or groups.ab.)) not exp animals/ not humans.sh.
4. Electronic Cigarette/ or (e cig\* or electr\* cigar\* or electronic nicotine).mp. or (vape or vaper or vapers or vaping or non-combustible nicotine-containing product).ti,ab,kw.
5. Nicotine Replacement Therapy/ or NRT.ti,ab,kw. or (nicotine adj2 (patch\* or gum or nasal spray or mouth spray or mouth strips or lozenge\* or tablet\* or microtab\* or sublingual or replac\*)).mp. or (nicotine adj3 therapy).mp.
6. 4 and 5 and (Crossover-Procedure/ or Double-Blind Procedure/ or Randomized Controlled Trial/ or Single-Blind Procedure/ or (random\* or factorial\* or crossover\* or cross over\* or cross-over\* or placebo\* or (doubl\* adj blind\*) or (singl\* adj blind\*) or assign\* or allocat\* or volunteer\*).ti,ab,kw.)
7. limit 6 to embase
8. (e cig\* or electr\* cigar\* or electronic nicotine).mp. or (vape or vaper or vapers or vaping or non-combustible nicotine-containing product).ti,ab,kw.
9. NRT.ti,ab,kw. or (nicotine adj2 (patch\* or gum or nasal spray or mouth spray or mouth strips or lozenge\* or tablet\* or microtab\* or sublingual or replac\*)).mp. or (nicotine adj3 therapy).mp.
10. 8 and 9
11. 3 use medall
12. 7 use emczd
13. 10 use cctr
14. 11 or 12 or 13
15. remove duplicates from 14
16. 15 use medall
17. 15 use emczd
18. 15 use cctr

1  
2  
3  
4  
5  
6  
7 ClinicalTrials.gov

8 (electronic cigarette OR vape OR vaping OR electronic nicotine) AND (nicotine replacement OR  
9 NRT OR patch OR gum OR nasal spray OR mouth spray OR mouth strips OR lozenge OR tablet  
10 OR microtab OR microtablet OR sublingual) | Interventional Studies

11  
12 91 records retrieved  
13

14  
15 WHO ICTRP

16 electronic cigarette OR vape or vaping OR electronic nicotine

17 153 records retrieved with 20 remaining after records with a TrialID starting with NCT were  
18 removed prior to screening  
19

20  
21 Note: As the ICTRP registry has limited search capabilities<sup>35</sup>, only terms related to the  
22 intervention were used and protocols with a NCT number were removed from the retrieval, as  
23 those protocols would also be included in ClinicalTrials.gov.  
24  
25  
26  
27  
28  
29  
30  
31  
32  
33  
34  
35  
36  
37  
38  
39  
40  
41  
42  
43  
44  
45  
46  
47  
48  
49  
50  
51  
52  
53  
54  
55  
56  
57  
58  
59  
60

## Supplementary Material 2

### Abstracted data

The abstracted data included the following:

1- *study characteristics:*

author names, year of publication, ties with tobacco industry, funding of study, country of study, study setting, study design, number of participating sites, recruitment procedures, enrolment dates, length of study period, random sequence generation, allocation sequence concealment, blinding, methods for preventing and controlling confounding, selection bias, information bias and missing bias, unit of analysis, covariates inclusion, funding, financial and conflict of interest disclosure including ties with industry, inclusion and exclusion criteria, sample size, number of participants that were analyzed, number of participants lost to follow up for each outcome and for the whole study, number of participants at study onset and randomized to each group, and type of analysis (intention to treat vs per protocol)

2- *participant characteristics:*

age, gender, comorbidities, ethnicities, socio-economic status, income, education, cigarettes smoked per day, Fagerström test for cigarette dependence

3- *intervention characteristics:*

type, model, brand and generation of ENDS, type and flavor of e-liquid, nicotine content, intervention protocol, length of time ENDS were provided free of charge, frequency of use, duration of intervention, integrity of intervention, description of co-interventions

4- *comparator characteristics:*

type of nicotine replacement therapy used, dose, frequency of use, nicotine content, control protocol, frequency of use, length of time supplies were provided free of charge, combination of products, frequency of use duration of control, integrity of control, description of co-interventions

5- *outcomes:*

smoking cessation, method of assessment for smoking cessation used (self-report vs biochemical), smoking abstinence definition, longest time point of smoking cessation, harms assessment, methods of harms assessment, definition of harms, withdrawal symptoms, method of assessment for withdrawal symptoms, reduction in cigarettes smoked, method of assessment of reduction in cigarettes smoked, number of quit attempts, method of quit attempt measurement, acceptance of ENDS/NRT, method of acceptance assessment, method of aggregation used for each outcome, timing of measurement for each outcome, summary data for each outcome, method of aggregation used for each outcome.

**Supplementary Material 3**  
**Detailed description of the included studies**

**Supplementary Table 1a. Characteristics of randomized controlled trials measuring smoking cessation at 6 months or later**

| <b>Bullen, 2013</b>  |                                                                                                                                                                                                                                                                                                                                                                                                                                                                                                                                                                                                                                                                                                                                                                                                                                                                                                                                                          |
|----------------------|----------------------------------------------------------------------------------------------------------------------------------------------------------------------------------------------------------------------------------------------------------------------------------------------------------------------------------------------------------------------------------------------------------------------------------------------------------------------------------------------------------------------------------------------------------------------------------------------------------------------------------------------------------------------------------------------------------------------------------------------------------------------------------------------------------------------------------------------------------------------------------------------------------------------------------------------------------|
| <b>Methods</b>       | <p><b>Design:</b> 3 parallel groups RCT</p> <p><b>Recruitment:</b> Participants were recruited via community newspapers, inviting people to call the study centre for eligibility pre-screening</p> <p><b>Setting:</b> one single center in Auckland Australia</p> <p><b>Inclusion criteria:</b> 18 years of age or older, smoked 10 or more cigarettes per day for the past year, and wanted to quit smoking.</p> <p><b>Exclusion criteria:</b> Pregnant or breastfeeding women, people using smoking cessation drugs, those reporting heart attack, stroke, severe angina in the previous 2 weeks, and people with poorly controlled medical disorders allergies, or other chemical dependence were excluded</p>                                                                                                                                                                                                                                       |
| <b>Participants</b>  | <p><b>Total N:</b> 657 smokers were included in this study, but we only extracted 584 participants for our review (2 of the 3 groups) as the e-cigarette placebo group did not fit our eligibility criteria.</p> <p>Most participants were women (62%), of a mean age &gt; 40. Approximately one third were of Maori descent, and a little over half had completed grade 12 or above education level. The average daily number of cigarettes smoked at study onset was around 18, and mean Fagerström test result (0 to 10 scale) for cigarette dependence was &gt; 5.</p>                                                                                                                                                                                                                                                                                                                                                                               |
| <b>Interventions</b> | <p><b>Randomization:</b> 4:4:1 ratio to nicotine e-cigarettes, nicotine patches and placebo e-cigarette group</p> <p><b>Nicotine e-cigarette group</b><br/>Participants were couriered a first-generation e-cigarette, spare battery and charger, as well as cartridges containing 10 to 16mg of nicotine per mL (although labelled to contain 16 mg), plus simple instructions to use the e-cigarettes as desired from 1 week before until 12 weeks after their chosen quit day. Participants received on average around 20% of the nicotine obtained from cigarette smoking.</p> <p><b>Nicotine patch group</b><br/>Participants were sent exchange cards in the mail redeemable for nicotine patches 21 mg from community pharmacies, with instructions to use the patches daily, from 1 week before until 12 weeks after their chosen quit day. Vouchers were also supplied to participants to cover dispensing costs.</p> <p><b>Both groups</b></p> |

|                      |                                                                                                                                                                                                                                                                                                                                                                                                                                                                                                                                                                                                                                                                                                                                                                                                                                        |
|----------------------|----------------------------------------------------------------------------------------------------------------------------------------------------------------------------------------------------------------------------------------------------------------------------------------------------------------------------------------------------------------------------------------------------------------------------------------------------------------------------------------------------------------------------------------------------------------------------------------------------------------------------------------------------------------------------------------------------------------------------------------------------------------------------------------------------------------------------------------|
|                      | Participants in all groups were also referred to telephone-based behavioural support                                                                                                                                                                                                                                                                                                                                                                                                                                                                                                                                                                                                                                                                                                                                                   |
| <b>Outcomes</b>      | Continuous abstinence at 6 months after quit day, defined as self-reported abstinence over the whole follow-up period allowing for 5 or less cigarettes in total, was self-reported, and verified with exhaled breath carbon monoxide of <10 ppm. Harms were both clinically assessed and self-reported, throughout the study period. Withdrawal symptoms were assessed at 1, 3, and 6 months. Reduction in daily cigarettes smoked was measured at 6 months, and acceptance of therapy was measured at 1 and 6 months.                                                                                                                                                                                                                                                                                                                |
| <b>Notes</b>         | Some of this study's authors reported ties to e-cigarette manufacturers, and smoking cessation drug companies                                                                                                                                                                                                                                                                                                                                                                                                                                                                                                                                                                                                                                                                                                                          |
| <b>Hajek, 2019</b>   |                                                                                                                                                                                                                                                                                                                                                                                                                                                                                                                                                                                                                                                                                                                                                                                                                                        |
| <b>Methods</b>       | <p><b>Design:</b> 2 parallel groups RCT</p> <p><b>Recruitment:</b> Participants were recruited through stop smoking services, which included trial information in their advertising. Participants were also recruited through social media, and leaflets advertising the trial were delivered to local households.</p> <p><b>Setting:</b> 3 sites in the United Kingdom</p> <p><b>Inclusion criteria:</b> Adults, with no strong preference towards e-cigarette or NRT, who were not using either type of product at the time of study enrolment</p> <p><b>Exclusion criteria:</b> Pregnant women or breastfeeding women</p>                                                                                                                                                                                                           |
| <b>Participants</b>  | <p><b>Total N:</b> 884 participants were included in this study</p> <p>Median age for both groups was 41, and women comprised 48% of participants. Most participants were White British, and the majority had post-secondary education. Median daily number of cigarettes smoked at study onset was 15, and mean Fagerström test result for cigarette dependence was 4.5 in the e-cigarette group and 4.6 in the NRT group.</p>                                                                                                                                                                                                                                                                                                                                                                                                        |
| <b>Interventions</b> | <p><b>Randomization:</b> nicotine-containing e-cigarettes of varying doses, and any choice of a list of NRT, in a 1:1 ratio</p> <p><b>E-cigarette group</b></p> <p>Participants were provided with a starter pack called One Kit, which included an atomizer, a battery, and one 30 mL bottle of Tobacco Royale flavor e-liquid. Participants were asked to purchase their future e-liquid online or from local vape shops and to buy a different e-cigarette device if the one supplied did not meet their needs. They were encouraged to experiment with e-liquids of different strengths and flavors. Those who were unable to obtain their own supply were provided with one further 10-ml bottle, but this was not offered proactively. Participants received oral and written information on how to operate the e-cigarette.</p> |



|                      |                                                                                                                                                                                                                                                                                                                                                                                                                                                                                                                                                                                                                                                                                                   |
|----------------------|---------------------------------------------------------------------------------------------------------------------------------------------------------------------------------------------------------------------------------------------------------------------------------------------------------------------------------------------------------------------------------------------------------------------------------------------------------------------------------------------------------------------------------------------------------------------------------------------------------------------------------------------------------------------------------------------------|
|                      | <p><b>NRT group</b><br/>Participants were informed about the range of nicotine-replacement products (patch, gum, lozenge, nasal spray, inhalator, mouth spray, mouth strip, and microtabs) and selected their preferred product. Use of combinations was encouraged, typically the patch and a faster-acting oral product. Participants were also free to switch products.ps</p> <p><b>Both groups</b><br/>Participants in both groups were offered multisession behavioral support as per UK stop smoking service practice, involving weekly one on one session with local clinicians.<br/>Participants were also asked to sign a commitment to not use the unassigned treatment for 4 weeks</p> |
| <b>Outcomes</b>      | Continuous abstinence at 52 weeks after quit day, defined as self-reported abstinence over the whole follow-up period allowing for 5 or less cigarettes in total, was self-reported, and verified with exhaled breath carbon monoxide of <8 ppm. Harms were self-reported throughout the study period. Withdrawal symptoms were assessed at 1 and 4 weeks in abstainers. Reduction in daily cigarettes smoked was also measured at 52 weeks, as well as acceptance of e-cigarettes and NRT                                                                                                                                                                                                        |
| <b>Notes</b>         | Some of this study's authors reported ties to smoking cessation drug companies.                                                                                                                                                                                                                                                                                                                                                                                                                                                                                                                                                                                                                   |
| <b>Lee SH, 2019</b>  |                                                                                                                                                                                                                                                                                                                                                                                                                                                                                                                                                                                                                                                                                                   |
| <b>Methods</b>       | <p><b>Design:</b> 2 parallel groups RCT</p> <p><b>Recruitment:</b> Participants were recruited from a motor company in the Republic of Korea.</p> <p><b>Setting:</b> One site in Cheonan, Republic of Korea</p> <p><b>Inclusion criteria:</b> Participants were adults 18 years and above, male, who smoked at least 10 cigarettes per day in the preceding year, and who were motivated to stop smoking entirely or to reduce their cigarette consumption</p> <p><b>Exclusion criteria:</b> Participants were excluded if they had a past medical history of serious clinical diseases or had attempted to stop smoking in the last 12 months by using other NRT.</p>                            |
| <b>Participants</b>  | <p><b>Total N:</b> 150 participants were included in the study</p> <p>Mean age was 42 years and all participants were men. Almost 40% had post-secondary education. Median daily number of cigarettes smoked at study onset was 1 pack per day, and mean Fagerström test result for cigarette dependence was 4.</p>                                                                                                                                                                                                                                                                                                                                                                               |
| <b>Interventions</b> | <p><b>Randomization:</b> nicotine-containing e-cigarettes, and nicotine gum in a 1:1 ratio</p> <p><b>E-cigarette group</b></p>                                                                                                                                                                                                                                                                                                                                                                                                                                                                                                                                                                    |

|                      |                                                                                                                                                                                                                                                                                                                                                                                                                                                                                                                                                                                                                                                                                                                                                                                                                                                                                                                                    |
|----------------------|------------------------------------------------------------------------------------------------------------------------------------------------------------------------------------------------------------------------------------------------------------------------------------------------------------------------------------------------------------------------------------------------------------------------------------------------------------------------------------------------------------------------------------------------------------------------------------------------------------------------------------------------------------------------------------------------------------------------------------------------------------------------------------------------------------------------------------------------------------------------------------------------------------------------------------|
|                      | <p>Participants received a 24-week supply of e-cigarettes eGo-C Ovale, Janty-Korea Co., Janty-Asia Co., Seoul, Republic of Korea, nicotine 0.01 mg/mL.</p> <p><b>Nicotine gum group</b><br/>Participants received a 24-week supply of nicotine gum Nicoman, Daewoog Pharmaceutical, Seongnam, Republic of Korea, 2 mg/tablet</p> <p><b>Both groups</b><br/>Participants in both groups were offered 55-minute education sessions on smoking cessation aids</p>                                                                                                                                                                                                                                                                                                                                                                                                                                                                     |
| <b>Outcomes</b>      | Continuous abstinence was defined as abstinence from smoking from 9 to 24 weeks, validated with end-expiratory carbon monoxide (<10 ppm) and a negative urine cotinine result. Harms were self-reported throughout the study period. Reduction in daily cigarettes smoked was also measured at 24 weeks.                                                                                                                                                                                                                                                                                                                                                                                                                                                                                                                                                                                                                           |
| <b>Notes</b>         | None of the study authors were found to have ties to industry.                                                                                                                                                                                                                                                                                                                                                                                                                                                                                                                                                                                                                                                                                                                                                                                                                                                                     |
| <b>Lee SM, 2018</b>  |                                                                                                                                                                                                                                                                                                                                                                                                                                                                                                                                                                                                                                                                                                                                                                                                                                                                                                                                    |
| <b>Methods</b>       | <p><b>Design:</b> 2 parallel groups RCT</p> <p><b>Recruitment:</b> Participants were recruited from an anesthesia preoperative clinic for elective surgery.</p> <p><b>Setting:</b> San Francisco Veterans' Affairs Medical Center, affiliated with the University of California in San Francisco United States of America</p> <p><b>Inclusion criteria:</b> Participants were eligible if they presented to the clinic 3 or more days prior to elective surgery, smoked more than two cigarettes per day, and had smoked at least once in the last 7 days</p> <p><b>Exclusion criteria:</b> Participants were excluded if they exclusively used other forms of tobacco (e.g. pipe tobacco) or marijuana only, were pregnant or breastfeeding, had an unstable condition, were using smoking cessation therapy at the time of study enrolment or were in another smoking cessation trial, or currently used e-cigarettes daily.</p> |
| <b>Participants</b>  | <p><b>Total N:</b> 30 participants were included in this study</p> <p>Most participants were men (90%) in their 50's. Some had comorbidities including diabetes, hypertension, heart disease, and chronic obstructive pulmonary disease. Most were Caucasians. The average daily number of cigarettes smoked at study onset was 15.3 in the e-cigarette group, and 10.8 in the NRT group, and the mean Fagerström test result for cigarette dependence was 3.7 in the e-cigarette group and 2.5 in the NRT group.</p>                                                                                                                                                                                                                                                                                                                                                                                                              |
| <b>Interventions</b> | <p><b>Randomization:</b> e-cigarettes and nicotine patches in a 2:1 ratio</p> <p><b>E-cigarette group</b><br/>Participants received a 6-week supply of NJOY e-cigarettes (Scottsdale, AZ, USA), a disposable first-generation e-cigarette that is available in shops and online. They were issued a number of e-cigarettes corresponding to</p>                                                                                                                                                                                                                                                                                                                                                                                                                                                                                                                                                                                    |

|                 |                                                                                                                                                                                                                                                                                                                                                                                                                                                                                                                                                                                                                                                                                                                                                                                                                                                                                                                                                                                                                                                                                                                                                                                            |
|-----------------|--------------------------------------------------------------------------------------------------------------------------------------------------------------------------------------------------------------------------------------------------------------------------------------------------------------------------------------------------------------------------------------------------------------------------------------------------------------------------------------------------------------------------------------------------------------------------------------------------------------------------------------------------------------------------------------------------------------------------------------------------------------------------------------------------------------------------------------------------------------------------------------------------------------------------------------------------------------------------------------------------------------------------------------------------------------------------------------------------------------------------------------------------------------------------------------------|
|                 | <p>the reported baseline cigarettes smoked per day, calculated assuming one NJOY e-cigarette was equivalent to 10 cigarettes. Participants were instructed to smoke bold (4.5%) e-cigarettes ad libitum for 3 weeks, then the Gold (2.4%) e-cigarettes ad libitum for 2 weeks, and then the Study (0%) e-cigarettes ad libitum for the final week.</p> <p><b>Nicotine patch group</b><br/>Participants randomized to the nicotine patches group were given a 6-week supply of Nicoderm CQ patches (5 weeks) and placebo patches (1 week) appropriate to baseline nicotine consumption. Those smoking an average of ten or more cigarettes per day were given a 21 mg/day patch for 3 weeks, a 14 mg/day patch for 1 week, a 7 mg/day patch for 1 week, and a 0 mg/day patch for 1 week. Participants who reported smoking an average of fewer than 10 cigarettes per day at baseline were given a 14 mg/day patch for 3 weeks, a 7 mg/day patch for 2 weeks, and a 0 mg/day patch for 1 week.</p> <p><b>Both groups</b><br/>Participants in both groups were given referral California Smokers' Helpline and were asked to refrain from the use of cigarettes during the study period.</p> |
| <b>Outcomes</b> | Smoking cessation at 6 months was self-reported through 7-day point-prevalence abstinence and verified with exhaled breath carbon monoxide of <10 ppm. Harms and withdrawal symptoms were systematically collected at 8 weeks. Reduction in daily cigarettes smoked was also measured at 6 months, as well as acceptance of e-cigarettes and NRT.                                                                                                                                                                                                                                                                                                                                                                                                                                                                                                                                                                                                                                                                                                                                                                                                                                          |
| <b>Notes</b>    | None of the study authors were found to have ties to industry.                                                                                                                                                                                                                                                                                                                                                                                                                                                                                                                                                                                                                                                                                                                                                                                                                                                                                                                                                                                                                                                                                                                             |

**Supplementary Table 1b. Characteristics of randomized controlled trial measuring smoking cessation earlier than 6 months**

|                        |                                                                                                                                                                                                                                                                                                                                                                                                                                                                                                                                                                                   |
|------------------------|-----------------------------------------------------------------------------------------------------------------------------------------------------------------------------------------------------------------------------------------------------------------------------------------------------------------------------------------------------------------------------------------------------------------------------------------------------------------------------------------------------------------------------------------------------------------------------------|
| <b>Hatsukami, 2019</b> |                                                                                                                                                                                                                                                                                                                                                                                                                                                                                                                                                                                   |
| <b>Methods</b>         | <p><b>Design:</b> 4 parallel groups RCT</p> <p><b>Recruitment:</b> Participants were culled from two sets of studies, one of which also included two groups randomized to snus (spitless smokeless tobacco); one was complete substitution with snus, and the other was ad libitum use. Due to recruitment challenges, the two snus groups were dropped midway through the study, resulting in four experimental groups: ad libitum use of e-cigarettes (participants may smoke as many cigarettes as they like), complete substitution with e-cigarettes (aiming for smoking</p> |

|                      |                                                                                                                                                                                                                                                                                                                                                                                                                                                                                                                                                                                                                                                                                                                                                                                                                                                                                                                                                                                                                                                                                                                                                                                                                                                                                                               |
|----------------------|---------------------------------------------------------------------------------------------------------------------------------------------------------------------------------------------------------------------------------------------------------------------------------------------------------------------------------------------------------------------------------------------------------------------------------------------------------------------------------------------------------------------------------------------------------------------------------------------------------------------------------------------------------------------------------------------------------------------------------------------------------------------------------------------------------------------------------------------------------------------------------------------------------------------------------------------------------------------------------------------------------------------------------------------------------------------------------------------------------------------------------------------------------------------------------------------------------------------------------------------------------------------------------------------------------------|
|                      | <p>cessation), complete substitution with NRT, continued smoking with usual brand of cigarettes.</p> <p>Participants were recruited through various media outlets across three institutions. The advertisements stated that a study was recruiting smokers who were interested in trying a product that may reduce exposure to harmful tobacco smoke.</p> <p><b>Settings:</b> 3 sites, University of Minnesota, Twin Cities (lead site); The Ohio State University, Columbus, OH; Roswell Park Cancer Center, Buffalo, NY United States of America</p> <p><b>Inclusion criteria:</b> Participants were adults at least 18 years of age, smoked at least 5 cigarettes per day with a breath carbon monoxide test of at least 10 ppm or a NicAlert test = level 6, and in stable physical and mental health.</p> <p><b>Exclusion criteria:</b> Participants were excluded if they had a serious quit attempt in the past 3 months, recent (&lt;3 months) alcohol or drug abuse problems, regular use of other nicotine or tobacco products, were planning to quit smoking in the next 3 months, suffered from chronic conditions affecting results of biomarker analyses, were currently using NRT or other cessation medication, or if they were pregnant or planning to become pregnant, or breastfeeding</p> |
| <b>Participants</b>  | <p><b>Total N:</b> 264 participants were included in the study, but data for this review were only extracted from the complete substitution with e-cigarette group, and complete substitution with NRT group (152 participants), as the other two groups did not fit our eligibility criteria. Median age was 47 years, and women comprised 49% of participants. Most participants were White, and the majority had post-secondary education. The median daily number of cigarettes smoked at study onset was 15, and median Fagerström test result for cigarette dependence was 3.</p>                                                                                                                                                                                                                                                                                                                                                                                                                                                                                                                                                                                                                                                                                                                       |
| <b>Interventions</b> | <p><b>Randomization:</b> e-cigarettes and nicotine gum or lozenges</p> <p><b>E-cigarette group</b><br/>Participants randomized to this group used Vuse Solo, manufactured by RJ Reynolds Inc as the primary e-cigarette. Early in the study, Blu e-cigarettes (cartridge-based system) and Fin (prefilled tanks system) were used, but Vuse attained the highest market share early on so the study switched exclusively to Vuse. E-cigarettes with a 4.8% nicotine concentration were provided to participants free of charge for 8 weeks, as well as 7 cartridges weekly, with the option of returning to the clinic to obtain additional cartridges if needed. Tobacco, menthol, mint, and berry flavors were available.</p> <p><b>NRT group</b></p>                                                                                                                                                                                                                                                                                                                                                                                                                                                                                                                                                       |

|                 |                                                                                                                                                                                                                                                                                                                                                                                                                                                                                                                                                                                                                                                                                                                                                                                                                                                        |
|-----------------|--------------------------------------------------------------------------------------------------------------------------------------------------------------------------------------------------------------------------------------------------------------------------------------------------------------------------------------------------------------------------------------------------------------------------------------------------------------------------------------------------------------------------------------------------------------------------------------------------------------------------------------------------------------------------------------------------------------------------------------------------------------------------------------------------------------------------------------------------------|
|                 | <p>Participants could choose between mint, cinnamon or fruit-flavored nicotine gum or nicotine lozenge, at a dose of 4 mg. If adverse effects were recorded, the dose was decreased to 2 mg.</p> <p><b>Both groups</b><br/>After randomization, participants were asked to complete daily diaries via interactive voice recording to chart the number of cigarettes smoked daily, as well as document assigned product use for the duration of the trial. Participants received a monetary bonus if they complied with the protocol; this included keeping an accurate record of product use, completing the daily diaries, and returning unused products. They also got a bonus payment if they had a carbon monoxide level <math>\leq</math> 4 ppm at each visit. Participants also received a brief counseling session on how to avoid smoking.</p> |
| <b>Outcomes</b> | <p>Smoking cessation was determined by 7-day point prevalence at 8 weeks, mainly through biochemical verification but also by self-report. Reduction in daily cigarettes smoked was also measured at 8 weeks, as well as acceptance of e-cigarettes and NRT.</p> <p>Harms were assessed systematically at 20 weeks, 12 weeks after the end of the study period. Withdrawal symptoms were assessed at weeks 1, 2, 4, 6, and 8.</p>                                                                                                                                                                                                                                                                                                                                                                                                                      |
| <b>Notes</b>    | <p>One of the study authors is a member of the FDA Tobacco Products Scientific Advisory Committee and another one has served as an expert witness in tobacco company litigation.</p>                                                                                                                                                                                                                                                                                                                                                                                                                                                                                                                                                                                                                                                                   |

**Supplementary Table 1c. Characteristics of randomized controlled trial measuring other outcomes**

|                         |                                                                                                                                                                                                                                                                                                      |
|-------------------------|------------------------------------------------------------------------------------------------------------------------------------------------------------------------------------------------------------------------------------------------------------------------------------------------------|
| <b>Eisenhofer, 2015</b> |                                                                                                                                                                                                                                                                                                      |
| <b>Methods</b>          | <p><b>Design:</b> 2 parallel groups RCT<br/> <b>Recruitment:</b> Not specified<br/> <b>Setting:</b> Not specified<br/> <b>Inclusion criteria:</b> Veterans who met criteria for tobacco disorder as per the DSM<br/> <b>Exclusion criteria:</b> Not specified</p>                                    |
| <b>Participants</b>     | <p><b>Total N:</b> 11 participants were included<br/> Mean age was 52, and 82% were males. The vast majority of participants were African American. The average daily number of cigarettes smoked at study onset was 26.5, and the mean Fagerström test result for cigarette dependence was 7.5.</p> |
| <b>Intervention</b>     | <p><b>Randomization:</b> e-cigarettes and nicotine patches</p> <p><b>E-cigarette group</b></p>                                                                                                                                                                                                       |

|                 |                                                                                                                                                                                                                                                                                                                                     |
|-----------------|-------------------------------------------------------------------------------------------------------------------------------------------------------------------------------------------------------------------------------------------------------------------------------------------------------------------------------------|
|                 | <p>Participants received nicotine-containing e-cigarettes with 16 mg of nicotine per cartridge</p> <p><b>NRT group</b><br/>Participants received nicotine patch 16 mg daily</p> <p><b>Both groups</b><br/>All participants were instructed to smoke ad libitum during week 1, and to smoke as little as possible during week 3.</p> |
| <b>Outcomes</b> | Reduction in cigarettes smoked per day was self-reported at 3 weeks and compared to week 1. Withdrawal symptoms were compared between week 1 and week 3.                                                                                                                                                                            |
| <b>Notes</b>    | This study was available as an abstract only therefore limited details are available.                                                                                                                                                                                                                                               |

**Supplementary Material 4**  
**Details on Risk of Bias Assessment for each outcome of interest**

**Supplementary Table 2. Detailed description of concerns for each domain marked identified as “some concerns” or “high risk” on Risk of Bias Assessment**

| <b>Smoking cessation outcome</b> |                                                                                                                  |                                                                                                                                                                                                                                                                                                                                               |                                                                                                                          |                                   |                                         |
|----------------------------------|------------------------------------------------------------------------------------------------------------------|-----------------------------------------------------------------------------------------------------------------------------------------------------------------------------------------------------------------------------------------------------------------------------------------------------------------------------------------------|--------------------------------------------------------------------------------------------------------------------------|-----------------------------------|-----------------------------------------|
|                                  | <b>Randomization Process</b>                                                                                     | <b>Deviations from intended intervention</b>                                                                                                                                                                                                                                                                                                  | <b>Missing of outcome data</b>                                                                                           | <b>Measurement of the outcome</b> | <b>Selection of the reported result</b> |
| <b>Bullen 2013</b>               | Low risk                                                                                                         | Adherence higher in the ENDS group compared to NRT group at all timepoints. At 6 months, 29% of ENDS group vs 8% of NRT group still using assigned treatment.                                                                                                                                                                                 | Low risk                                                                                                                 | Low risk                          | Low risk                                |
| <b>Hajek 2019</b>                | Low risk                                                                                                         | At 52 weeks among participants with 1-year abstinence, 80% were using e-cigarettes in the ENDS group vs 9% in the NRT group. Also, 6% of participants in the ENDS group reported using non-allocated NRT for at least five consecutive days in the past six months compared to 22% in the NRT group that reported using non-allocated product | Low risk                                                                                                                 | Low risk                          | Low risk                                |
| <b>Hatsukami 2019</b>            | No information provided with regards to randomization process and allocation concealment. However, there were no | The NRT group had the highest dropout rates compared to the other groups in the study. At 8 weeks, 24% dropped out in the ENDS group compared to 30% in the NRT group.                                                                                                                                                                        | Large number of dropouts; participants who did not stop smoking could be less motivated to continue with study follow up | Low risk                          | Low risk                                |

|                                  |                                                                                         |                                                                                                                                                     |                                                                                                                                                                                                                                         |          |                                              |
|----------------------------------|-----------------------------------------------------------------------------------------|-----------------------------------------------------------------------------------------------------------------------------------------------------|-----------------------------------------------------------------------------------------------------------------------------------------------------------------------------------------------------------------------------------------|----------|----------------------------------------------|
|                                  | significant baseline differences between groups                                         |                                                                                                                                                     |                                                                                                                                                                                                                                         |          |                                              |
| <b>Lee, SH 2019</b>              | The use of constant block sizes of 2 makes it easy to determine order of randomization. | No participants discontinued the intervention. However, 4 and 14 participants in the ENDS and NRT group dropped out before treatment, respectively. | Although data was missing for 12% of randomized individuals, all dropouts occurred prior to the start of treatment. Missingness in this case less likely to be due to the value of the outcome as it happened prior to onset of therapy | Low risk | Low risk                                     |
| <b>Lee, SM 2018</b>              | Low risk                                                                                | Low risk                                                                                                                                            | Low risk                                                                                                                                                                                                                                | Low risk | Low risk                                     |
| <b>Smoking reduction outcome</b> |                                                                                         |                                                                                                                                                     |                                                                                                                                                                                                                                         |          |                                              |
| <b>Bullen 2013</b>               | Low risk                                                                                | Refer to smoking cessation outcome                                                                                                                  | Sensitivity analyses conducted for the smoking cessation outcome were not performed for the smoking reduction outcome                                                                                                                   | Low risk | Low risk                                     |
| <b>Eisenhofer 2015</b>           | Not enough information available in abstract                                            | Not enough information available in abstract                                                                                                        | Not enough information available in abstract                                                                                                                                                                                            | Low risk | Not enough information available in abstract |
| <b>Hajek 2019</b>                | Low risk                                                                                | Refer to smoking cessation outcome                                                                                                                  | Low risk                                                                                                                                                                                                                                | Low risk | Low risk                                     |
| <b>Hatsukami 2019</b>            | Refer to smoking cessation outcome                                                      | Refer to smoking cessation outcome                                                                                                                  | Refer to smoking cessation outcome                                                                                                                                                                                                      | Low risk | Low risk                                     |
| <b>Lee, SH 2019</b>              | Refer to smoking cessation outcome                                                      | Refer to smoking cessation outcome                                                                                                                  | Refer to smoking cessation outcome                                                                                                                                                                                                      | Low risk | Low risk                                     |
| <b>Lee, SM 2018</b>              | Low risk                                                                                | Low risk                                                                                                                                            | Low risk                                                                                                                                                                                                                                | Low risk | Low risk                                     |
| <b>Harms outcome</b>             |                                                                                         |                                                                                                                                                     |                                                                                                                                                                                                                                         |          |                                              |



1  
2  
3  
4  
5  
6  
7  
8  
9  
10  
11  
12  
13  
14  
15  
16  
17  
18  
19  
20  
21  
22  
23  
24  
25  
26  
27  
28  
29  
30  
31  
32  
33  
34  
35  
36  
37  
38  
39  
40  
41  
42  
43  
44  
45  
46  
47

|                       |                                    |                                                                                                                                                                                                  |                                                                                                                                                                                                                   |                                                                                                                                                  |          |
|-----------------------|------------------------------------|--------------------------------------------------------------------------------------------------------------------------------------------------------------------------------------------------|-------------------------------------------------------------------------------------------------------------------------------------------------------------------------------------------------------------------|--------------------------------------------------------------------------------------------------------------------------------------------------|----------|
| <b>Bullen 2013</b>    | Low risk                           | Differences in treatment adherence could potentially lead to discrepancies in harm reporting                                                                                                     | No information on the proportion of participants on whom adverse events were collected; it is likely that people who experienced more severe side effects did not continue with study follow-up activities        | high likelihood that participants who were unhappy with their treatment allocation would report side effects more often than their counterparts. | Low risk |
| <b>Hajek 2019</b>     | Low risk                           | Differences in treatment adherence could potentially lead to discrepancies in harm reporting                                                                                                     | The authors reported harm data based on number of participants at randomization, however significant dropout seen at 4-week follow up, raising concerns that adverse event data not collected on all participants | High likelihood that participants who were unhappy with their treatment allocation would report side effects more often than their counterparts  | Low risk |
| <b>Hatsukami 2019</b> | Refer to smoking cessation outcome | Differences in treatment adherence could potentially lead to discrepancies in harm reporting                                                                                                     | No information on the proportion of participants on whom adverse events were collected; it is likely that people who experienced more severe side effects did not continue with study follow-up activities        | High likelihood that participants who were unhappy with their treatment allocation would report side effects more often than their counterparts  | Low risk |
| <b>Lee, SH 2019</b>   | Refer to smoking cessation outcome | Differences in treatment adherence could potentially lead to discrepancies in harm reporting however non-adherence happened prior to onset of treatment, therefore less likely to have an impact | Low risk                                                                                                                                                                                                          | High likelihood that participants who were unhappy with their treatment allocation would report side effects more often than their counterparts  | Low risk |
| <b>Lee, SM 2018</b>   | Low risk                           | Low risk                                                                                                                                                                                         | Low risk                                                                                                                                                                                                          | High likelihood that participants who were unhappy with their                                                                                    | Low risk |

|                                    |                                              |                                                                                                             |                                                                                                                                                                              |                                                                                                                                                                                                              |                                                                   |
|------------------------------------|----------------------------------------------|-------------------------------------------------------------------------------------------------------------|------------------------------------------------------------------------------------------------------------------------------------------------------------------------------|--------------------------------------------------------------------------------------------------------------------------------------------------------------------------------------------------------------|-------------------------------------------------------------------|
|                                    |                                              |                                                                                                             |                                                                                                                                                                              | treatment allocation would report side effects more often than their counterparts                                                                                                                            |                                                                   |
| <b>Withdrawal symptoms outcome</b> |                                              |                                                                                                             |                                                                                                                                                                              |                                                                                                                                                                                                              |                                                                   |
| <b>Eisenhofer 2015</b>             | Not enough information available in abstract | Not enough information available in abstract                                                                | Not enough information available in abstract                                                                                                                                 | Not enough information available in abstract                                                                                                                                                                 | Not enough information available in abstract                      |
| <b>Hajek 2019</b>                  | Low risk                                     | Differences in treatment adherence could potentially lead to discrepancies in withdrawal symptoms reporting | Outcome not available for all randomized participants; likely that people who experienced more nicotine withdrawal symptoms did not continue with study follow-up activities | Given that the withdrawal measurements were self-reported, there is a high likelihood that participants who were unhappy with treatment allocation reported more withdrawal symptoms than their counterparts | Low risk                                                          |
| <b>Hatsukami 2019</b>              | Refer to smoking cessation outcome           | Differences in treatment adherence could potentially lead to discrepancies in withdrawal symptoms reporting | Outcome not available for all randomized participants; likely that people who experienced more nicotine withdrawal symptoms did not continue with study follow-up activities | Given that the withdrawal measurements were self-reported, there is a high likelihood that participants who were unhappy with treatment allocation reported more withdrawal symptoms than their counterparts | No information on how withdrawal symptom assessment was performed |
| <b>Lee, SM 2018</b>                | Low risk                                     | Low risk                                                                                                    | Low risk                                                                                                                                                                     | Given that the withdrawal measurements were self-reported, there is a high likelihood that participants who were                                                                                             | Low risk                                                          |

1  
2  
3  
4  
5  
6  
7  
8  
9  
10  
11  
12  
13  
14  
15  
16  
17  
18  
19  
20  
21  
22  
23  
24  
25  
26  
27  
28  
29  
30  
31  
32  
33  
34  
35  
36  
37  
38  
39  
40  
41  
42  
43  
44  
45  
46  
47

|                                      |                                              |                                                                                                             |                                                                                                          |                                                                                             |          |
|--------------------------------------|----------------------------------------------|-------------------------------------------------------------------------------------------------------------|----------------------------------------------------------------------------------------------------------|---------------------------------------------------------------------------------------------|----------|
|                                      |                                              |                                                                                                             |                                                                                                          | unhappy with treatment allocation reported more withdrawal symptoms than their counterparts |          |
| <b>Acceptance of therapy outcome</b> |                                              |                                                                                                             |                                                                                                          |                                                                                             |          |
| <b>Bullen 2013</b>                   | Low risk                                     | Differences in treatment adherence could potentially lead to discrepancies in acceptance of therapy outcome | Participants unhappy with their assigned therapy likely did not continue with study follow-up activities | Highly subjective outcome, inability to blind participants to assigned therapy              | Low risk |
| <b>Hajek 2019</b>                    | Low risk                                     | Differences in treatment adherence could potentially lead to discrepancies in acceptance of therapy outcome | Participants unhappy with their assigned therapy likely did not continue with study follow-up activities | Highly subjective outcome, inability to blind participants to assigned therapy              | Low risk |
| <b>Hatsukami 2019</b>                | Not enough information available in abstract | Differences in treatment adherence could potentially lead to discrepancies in acceptance of therapy outcome | Participants unhappy with their assigned therapy likely did not continue with study follow-up activities | Highly subjective outcome, inability to blind participants to assigned therapy              | Low risk |
| <b>Lee, SM 2018</b>                  | Low risk                                     | Low risk                                                                                                    | Low risk                                                                                                 | Highly subjective outcome, inability to blind participants to assigned therapy              | Low risk |

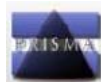

# PRISMA 2009 Checklist

| Section/topic                      | #  | Checklist item                                                                                                                                                                                                                                                                                              | Reported on page #   |
|------------------------------------|----|-------------------------------------------------------------------------------------------------------------------------------------------------------------------------------------------------------------------------------------------------------------------------------------------------------------|----------------------|
| <b>TITLE</b>                       |    |                                                                                                                                                                                                                                                                                                             |                      |
| Title                              | 1  | Identify the report as a systematic review, meta-analysis, or both.                                                                                                                                                                                                                                         | 0                    |
| <b>ABSTRACT</b>                    |    |                                                                                                                                                                                                                                                                                                             |                      |
| Structured summary                 | 2  | Provide a structured summary including, as applicable: background; objectives; data sources; study eligibility criteria, participants, and interventions; study appraisal and synthesis methods; results; limitations; conclusions and implications of key findings; systematic review registration number. | 1                    |
| <b>INTRODUCTION</b>                |    |                                                                                                                                                                                                                                                                                                             |                      |
| Rationale                          | 3  | Describe the rationale for the review in the context of what is already known.                                                                                                                                                                                                                              | 4                    |
| Objectives                         | 4  | Provide an explicit statement of questions being addressed with reference to participants, interventions, comparisons, outcomes, and study design (PICOS).                                                                                                                                                  | 4                    |
| <b>METHODS</b>                     |    |                                                                                                                                                                                                                                                                                                             |                      |
| Protocol and registration          | 5  | Indicate if a review protocol exists, if and where it can be accessed (e.g., Web address), and, if available, provide registration information including registration number.                                                                                                                               | 5                    |
| Eligibility criteria               | 6  | Specify study characteristics (e.g., PICOS, length of follow-up) and report characteristics (e.g., years considered, language, publication status) used as criteria for eligibility, giving rationale.                                                                                                      | 5                    |
| Information sources                | 7  | Describe all information sources (e.g., databases with dates of coverage, contact with study authors to identify additional studies) in the search and date last searched.                                                                                                                                  | 5,6                  |
| Search                             | 8  | Present full electronic search strategy for at least one database, including any limits used, such that it could be repeated.                                                                                                                                                                               | 5,6, Supp material 1 |
| Study selection                    | 9  | State the process for selecting studies (i.e., screening, eligibility, included in systematic review, and, if applicable, included in the meta-analysis).                                                                                                                                                   | 6                    |
| Data collection process            | 10 | Describe method of data extraction from reports (e.g., piloted forms, independently, in duplicate) and any processes for obtaining and confirming data from investigators.                                                                                                                                  | 6                    |
| Data items                         | 11 | List and define all variables for which data were sought (e.g., PICOS, funding sources) and any assumptions and simplifications made.                                                                                                                                                                       | 6, Supp material 2   |
| Risk of bias in individual studies | 12 | Describe methods used for assessing risk of bias of individual studies (including specification of whether this was done at the study or outcome level), and how this information is to be used in any data synthesis.                                                                                      | 6                    |
| Summary measures                   | 13 | State the principal summary measures (e.g., risk ratio, difference in means).                                                                                                                                                                                                                               | 6                    |

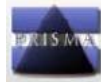

# PRISMA 2009 Checklist

|                      |    |                                                                                                                                                           |   |
|----------------------|----|-----------------------------------------------------------------------------------------------------------------------------------------------------------|---|
| Synthesis of results | 14 | Describe the methods of handling data and combining results of studies, if done, including measures of consistency (e.g., $I^2$ ) for each meta-analysis. | 7 |
|----------------------|----|-----------------------------------------------------------------------------------------------------------------------------------------------------------|---|

Page 1 of 2

| Section/topic                 | #  | Checklist item                                                                                                                                                                                           | Reported on page #      |
|-------------------------------|----|----------------------------------------------------------------------------------------------------------------------------------------------------------------------------------------------------------|-------------------------|
| Risk of bias across studies   | 15 | Specify any assessment of risk of bias that may affect the cumulative evidence (e.g., publication bias, selective reporting within studies).                                                             | 6                       |
| Additional analyses           | 16 | Describe methods of additional analyses (e.g., sensitivity or subgroup analyses, meta-regression), if done, indicating which were pre-specified.                                                         | 7                       |
| <b>RESULTS</b>                |    |                                                                                                                                                                                                          |                         |
| Study selection               | 17 | Give numbers of studies screened, assessed for eligibility, and included in the review, with reasons for exclusions at each stage, ideally with a flow diagram.                                          | 7, Figure 1             |
| Study characteristics         | 18 | For each study, present characteristics for which data were extracted (e.g., study size, PICOS, follow-up period) and provide the citations.                                                             | 7,8, Supp material 3    |
| Risk of bias within studies   | 19 | Present data on risk of bias of each study and, if available, any outcome level assessment (see item 12).                                                                                                | 9, Figures 2a,b,c,d,e   |
| Results of individual studies | 20 | For all outcomes considered (benefits or harms), present, for each study: (a) simple summary data for each intervention group (b) effect estimates and confidence intervals, ideally with a forest plot. | 9-13, Figures 3a,b,c,d, |
| Synthesis of results          | 21 | Present results of each meta-analysis done, including confidence intervals and measures of consistency.                                                                                                  | 9-12, Figures 3a,b,c,d  |
| Risk of bias across studies   | 22 | Present results of any assessment of risk of bias across studies (see Item 15).                                                                                                                          | 13                      |
| Additional analysis           | 23 | Give results of additional analyses, if done (e.g., sensitivity or subgroup analyses, meta-regression [see Item 16]).                                                                                    | 13, Figures 4a,b,c      |
| <b>DISCUSSION</b>             |    |                                                                                                                                                                                                          |                         |
| Summary of evidence           | 24 | Summarize the main findings including the strength of evidence for each main outcome; consider their relevance to key groups (e.g., healthcare providers, users, and policy makers).                     | 13-15                   |
| Limitations                   | 25 | Discuss limitations at study and outcome level (e.g., risk of bias), and at review-level (e.g., incomplete retrieval of identified research, reporting bias).                                            | 13-15                   |

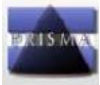

# PRISMA 2009 Checklist

1  
2  
3  
4  
5  
6  
7  
8  
9  
10  
11  
12  
13  
14  
15  
16  
17  
18  
19  
20  
21  
22  
23  
24  
25  
26  
27  
28  
29  
30  
31  
32  
33  
34  
35  
36  
37  
38  
39  
40  
41  
42  
43  
44  
45  
46  
47

|                |    |                                                                                                                                            |       |
|----------------|----|--------------------------------------------------------------------------------------------------------------------------------------------|-------|
| Conclusions    | 26 | Provide a general interpretation of the results in the context of other evidence, and implications for future research.                    | 13-15 |
| <b>FUNDING</b> |    |                                                                                                                                            |       |
| Funding        | 27 | Describe sources of funding for the systematic review and other support (e.g., supply of data); role of funders for the systematic review. | 0     |

From: Moher D, Liberati A, Tetzlaff J, Altman DG, The PRISMA Group (2009). Preferred Reporting Items for Systematic Reviews and Meta-Analyses: The PRISMA Statement. PLoS Med 6(7): e1000097. doi:10.1371/journal.pmed1000097

For more information, visit: [www.prisma-statement.org](http://www.prisma-statement.org).

Page 2 of 2

# BMJ Open

## Smoking cessation in individuals who use vaping as compared to traditional nicotine replacement therapies; a systematic review and meta-analysis

|                                 |                                                                                                                                                                                                                                                                                                                                                                                                          |
|---------------------------------|----------------------------------------------------------------------------------------------------------------------------------------------------------------------------------------------------------------------------------------------------------------------------------------------------------------------------------------------------------------------------------------------------------|
| Journal:                        | <i>BMJ Open</i>                                                                                                                                                                                                                                                                                                                                                                                          |
| Manuscript ID                   | bmjopen-2020-044222.R1                                                                                                                                                                                                                                                                                                                                                                                   |
| Article Type:                   | Original research                                                                                                                                                                                                                                                                                                                                                                                        |
| Date Submitted by the Author:   | 25-Jan-2021                                                                                                                                                                                                                                                                                                                                                                                              |
| Complete List of Authors:       | Pound, Catherine; University of Ottawa Faculty of Medicine; Children's Hospital of Eastern Ontario, Pediatrics<br>Zhang, Jennifer; University of Ottawa Faculty of Medicine, School of Epidemiology and Public Health<br>Kodua, Ama; University of Ottawa Faculty of Medicine, School of Epidemiology and Public Health<br>Sampson, Margaret; Children's Hospital of Eastern Ontario Research Institute, |
| <b>Primary Subject Heading</b>: | Smoking and tobacco                                                                                                                                                                                                                                                                                                                                                                                      |
| Secondary Subject Heading:      | Addiction, Public health                                                                                                                                                                                                                                                                                                                                                                                 |
| Keywords:                       | PUBLIC HEALTH, RESPIRATORY MEDICINE (see Thoracic Medicine), INTERNAL MEDICINE, PRIMARY CARE, Substance misuse < PSYCHIATRY                                                                                                                                                                                                                                                                              |
|                                 |                                                                                                                                                                                                                                                                                                                                                                                                          |

SCHOLARONE™  
Manuscripts

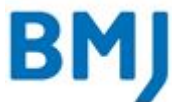

I, the Submitting Author has the right to grant and does grant on behalf of all authors of the Work (as defined in the below author licence), an exclusive licence and/or a non-exclusive licence for contributions from authors who are: i) UK Crown employees; ii) where BMJ has agreed a CC-BY licence shall apply, and/or iii) in accordance with the terms applicable for US Federal Government officers or employees acting as part of their official duties; on a worldwide, perpetual, irrevocable, royalty-free basis to BMJ Publishing Group Ltd ("BMJ") its licensees and where the relevant Journal is co-owned by BMJ to the co-owners of the Journal, to publish the Work in this journal and any other BMJ products and to exploit all rights, as set out in our [licence](#).

The Submitting Author accepts and understands that any supply made under these terms is made by BMJ to the Submitting Author unless you are acting as an employee on behalf of your employer or a postgraduate student of an affiliated institution which is paying any applicable article publishing charge ("APC") for Open Access articles. Where the Submitting Author wishes to make the Work available on an Open Access basis (and intends to pay the relevant APC), the terms of reuse of such Open Access shall be governed by a Creative Commons licence – details of these licences and which [Creative Commons](#) licence will apply to this Work are set out in our licence referred to above.

Other than as permitted in any relevant BMJ Author's Self Archiving Policies, I confirm this Work has not been accepted for publication elsewhere, is not being considered for publication elsewhere and does not duplicate material already published. I confirm all authors consent to publication of this Work and authorise the granting of this licence.



1  
2  
3 **Smoking cessation in individuals who use vaping as compared to traditional nicotine**  
4 **replacement therapies; a systematic review and meta-analysis**  
5

6  
7 Catherine M Pound<sup>a,b,c</sup>, Jennifer Zhe Zhang<sup>c</sup>, Ama Tweneboa Kodua<sup>c</sup>, Margaret Sampson<sup>a</sup>  
8

9 **Affiliations:** <sup>a</sup>Department of Pediatrics, Children's Hospital of Eastern Ontario, Ottawa, Canada,  
10 <sup>b</sup>Faculty of Medicine, University of Ottawa, <sup>c</sup>School of Epidemiology and Public Health,  
11 University of Ottawa  
12  
13

14 **Address correspondence to:** Catherine Pound, Division of Pediatrics, Children's Hospital of  
15 Eastern Ontario, Ottawa, Canada, 401 Smyth Road, Ottawa, Ontario, K1H8L1, 613-737-7600, ext  
16 2701, [cpound@cheo.on.ca](mailto:cpound@cheo.on.ca)  
17  
18

19 **Funding sources:** This research received no specific grant from any funding agency in the public,  
20 commercial or not-for-profit sectors.  
21  
22

23 **Competing interest statement:** The authors have no competing interest to declare.  
24

25 **Contributors statements:**

26 Dr Pound conceptualized and designed the study, carried out the analyses, interpreted the  
27 data, drafted the initial manuscript, reviewed, and revised the manuscript.

28 Mrs Zhang participated in the conceptualization and design of the study, carried out the  
29 analyses, interpreted the data, participated in drafting the initial manuscript, reviewed and  
30 revised the manuscript.  
31

32 Ms Kodua participated in the conceptualization and design of the study, and reviewed the  
33 manuscript.  
34

35 Dr Sampson participated in the design of the study, developed the search strategies, reviewed,  
36 and revised the manuscript.

37 All authors approved the final manuscript as submitted and agree to be accountable for all  
38 aspects of the work.  
39  
40  
41  
42  
43  
44  
45  
46  
47  
48  
49  
50  
51  
52  
53  
54  
55  
56  
57  
58  
59  
60

## ABSTRACT

**Objectives:** Despite the aggressive marketing of electronic nicotine device systems (ENDS) as smoking cessation tools, the evidence of their effectiveness is mixed. We conducted a systematic review of randomized controlled trials to determine the effect of ENDS on cigarette smoking cessation, as compared to other types of nicotine replacement therapies (NRT).

**Design:** Systematic review and meta-analysis using the Grading of Recommendations Assessment, Development, and Evaluation (GRADE) approach.

**Data sources:** MEDLINE, Embase, the CENTRAL Trials Registry of the Cochrane Collaboration using the Ovid interface, ClinicalTrials.gov and the World Health Organization International Clinical Trials Registry Platform trials registries were searched through June 17<sup>th</sup> 2020.

**Eligibility criteria for studies:** Randomized controlled trials in which any type of ENDS was compared to any type of NRT, in traditional cigarette users.

**Data extraction and synthesis:** The primary outcome was smoking cessation, defined as abstinence from traditional cigarette smoking for any time period, as reported in each included study, regardless of whether abstinence is self-reported or biochemically validated. Secondary outcomes included smoking reduction, harms, withdrawal, and acceptance of therapy. A random-effect model was used, and data were pooled in meta-analyses where appropriate.

**Results:** Six studies were retained from 270. Most outcomes were judged to be at high risk of bias. The overall quality of evidence was graded as 'low' or 'very low'. Pooled results showed no difference in smoking cessation (RR 1.42 [0.97, 2.09]), proportion of participants reducing smoking consumption (RR 1.25 [0.79, 1.98]), mean reduction in cigarettes smoked per day (MD 1.11 [-0.41, 2.63]), or harms (RR 0.96 [0.76, 1.20]), between groups.

**Conclusion:** We found no difference in smoking cessation, harms, and smoking reduction between e-cigarette and NRT users. However, the quality of the evidence was low. Further research is needed before widespread recommendations are made with regards to the use of ENDS.

**Systematic review registration number:** protocol registered with the International Prospective Register of Systematic Reviews (PROSPERO) on February 27<sup>th</sup>, 2020. Registration number pending.

### Strengths and limitations of this study

- This study provides up to date meta-analyses of direct comparisons of vaping with nicotine replacement therapy for smoking cessation, studied through randomized controlled trials.
- We examined harms associated with vaping, which are becoming increasingly concerning.

Smoking cessation in individuals who use vaping, as compared to traditional nicotine replacement therapies; a systematic review and meta-analysis 1

- This study makes extensive efforts to obtain unreported data from investigators.
- Careful consideration is given to the potential impact of risk of bias and methodological heterogeneity.
- As we included only RCTs, many studies that used weaker study designs were ineligible for this review.

**Abstract word count: 298 words**

**Text word count: 4917 words**

For peer review only

## INTRODUCTION

### Background

Despite a significant lack of rigorous pharmacological testing, the use of electronic nicotine device systems (ENDS), otherwise known as vaping devices, has been aggressively marketed as an effective method to quit smoking. In Canada, 32% of current and former smokers report having used ENDS as a smoking cessation aid.<sup>1</sup> In addition to delivering nicotine to the user, ENDS are thought to replace some of the habitual behaviours and sensations associated with smoking, such as the action of bringing a cigarette to the mouth. By doing so, ENDS may provide coping mechanisms that other traditional nicotine replacement therapies (NRT) do not offer, and therefore may help with the behavioural component of smoking reduction and cessation.<sup>2</sup> While vaping is believed to be less harmful than cigarette smoking, a large number of emerging reports on the health impacts of vaping are worrisome. In addition, the evidence on the effectiveness of ENDS as a smoking cessation aid is mixed.

In 2016, a meta-analysis of 20 studies found that people using ENDS had a 28% reduction in the odds of stopping cigarette smoking as compared to those not using ENDS.<sup>3</sup> However, in a 2019 recent randomized controlled trial (RCT), individuals randomized to nicotine-containing e-cigarettes were more likely to abstain from smoking at one year compared to individuals randomized to nicotine patches (18% compared to 9.9%, RR 1.83; 95% CI 1.30 to 2.58).<sup>4</sup> A Cochrane review<sup>5</sup> found that nicotine-containing e-cigarettes were more effective than non-nicotine containing e-cigarettes for smoking cessation, but was not able to compare ENDS products to traditional NRT.

Little information is known about the long-term health impacts of ENDS. Reports of acute toxicity have recently captured the public's attention. In late 2019 and early 2020, "e-cigarette, or vaping, product use-associated lung injury" (EVALI) caused 2807 illnesses and 68 deaths in the US,<sup>6</sup> and 19 cases in Canada.<sup>7</sup> Other short-term adverse events reported with the use of ENDS include cardiovascular changes such as increased heart rate and blood pressure, cough, wheeze,<sup>8</sup> and mucus production.<sup>9</sup> Burn injuries have also been reported, as well as fatalities from drinking or injecting the e-liquid.<sup>8</sup>

There is no long-term data available on the relationship between ENDS and oral, respiratory, and cardiovascular health, as well as cancer. There is however available data linking the chemicals present in e-liquids with cellular DNA damage and carcinogenicity.<sup>9,10</sup> There is some evidence that the use of ENDS is associated with asthma exacerbations.<sup>11</sup> No human long-term data exist on the use of ENDS in pregnancy and their impact on the developing fetus.

Given the large number of smokers using ENDS as a potential smoking cessation tool, there is a need to review and synthesize the evidence of trials examining a head to head comparison of ENDS versus traditional NRT for smoking cessation.

### Objective

Smoking cessation in individuals who use vaping, as compared to traditional nicotine replacement therapies; a systematic review and meta-analysis 3

1  
2  
3 The objective of this review is to systematically review the evidence found in RCTs to determine  
4 the effect of electronic nicotine delivery systems (ENDS) on cigarette smoking cessation in  
5 smokers, as compared to other types of nicotine replacement therapies (NRT).  
6  
7

## 8 **METHODS**

### 9 **Protocol and registration**

10 The protocol for this systematic review was submitted to International Prospective Register of  
11 Systematic Reviews (PROSPERO) on February 27<sup>th</sup>, 2020 (registration pending) and uploaded as  
12 a preprint on Open Science Framework (OSF) Preprints on May 12<sup>th</sup> 2020.<sup>12</sup>  
13  
14

### 15 **Patient and public involvement**

16 No patient involved  
17  
18

### 19 **Criteria for study inclusion**

#### 20 Study Characteristics:

21 RCTs in which ENDS were compared to non-electronic NRT in smokers were included. We  
22 restricted our inclusion to RCTs to minimize the risk of bias. No language limits were imposed.  
23 No date limits were imposed either, although we did not anticipate studies published prior to  
24 2003, since this is when the first e-cigarette was invented.<sup>13</sup> There was no geographical  
25 restriction of studies.  
26  
27

#### 28 Study Population:

29 All traditional cigarette users were included, regardless of age, amount of traditional cigarette  
30 use, and motivation to quit.  
31  
32

#### 33 Intervention of interest:

34 The intervention of interest comprised all types, models, and brands of ENDS.  
35  
36

#### 37 Comparators:

38 All included studies compared ENDS with non-electronic NRT. NRT comprised, but were not  
39 limited to, nicotine patch, gum, lozenge, nasal spray, inhalator, mouth spray, mouth strips,  
40 microtabs, and combination of products.  
41  
42

#### 43 Outcome measures:

44 The primary outcome measure is traditional cigarette smoking cessation defined as abstinence  
45 from traditional cigarette smoking for any time period, as reported in each included study,  
46 regardless of whether abstinence is self-reported or biochemically validated.  
47 Secondary outcomes include reduction in the number of traditional cigarettes smoked in any  
48 given time period, adverse events, withdrawal symptoms, and participants' acceptance of  
49 therapy. We had planned on collecting quit attempts information but none of the studies  
50 reported on this outcome.  
51  
52  
53

#### 54 Settings:

55 All health care and community settings were included.  
56

57 Smoking cessation in individuals who use vaping, as compared to traditional nicotine replacement therapies; a 4  
58 systematic review and meta-analysis  
59

## Study Identification

The following databases were searched through June 17<sup>th</sup> 2020: MEDLINE (1946 to June 2020), Embase (1947 to June 2020) and the CENTRAL Trials Registry of the Cochrane Collaboration (May 2020 Issue) using the Ovid interface. The MEDLINE search was limited using the Cochrane Highly Sensitive Search Strategy and the Embase search was limited using the recommended limit for controlled trials.<sup>14</sup> Searches were developed by a librarian experienced in systematic reviews, using a method designed to optimize term selection.<sup>15</sup> ClinicalTrials.gov and World Health Organization International Clinical Trials Registry Platform (WHO ICTRP) trials registries were searched for registered intervention studies, regardless of their completion status. Electronic search strategies are presented in Supplementary Material 1. The reference lists of included studies and any applicable review studies were searched.

Authors of protocols identified through registries were contacted electronically, to request data for the review. In addition, clinical experts in the field of vaping and smoking cessation were contacted to enquire about any unpublished research fulfilling our inclusion criteria.

### *Selection of Studies*

Records retrieved by the electronic search were downloaded and imported into a Reference Manager database for duplicate removal, and then uploaded to Covidence. Throughout the review, newly identified records were integrated into the set for screening.

Each title and abstract was independently screened by two review authors (from CP, JZ, and ATK) against the eligibility criteria.<sup>14</sup> Full text of all studies deemed potentially eligible was obtained and reviewed independently by two of the same review authors to determine eligibility. For screening, data extraction, and risk of bias assessment, disagreements were resolved by discussion, and with a third reviewer when needed.

### *Data extraction and management*

For studies that fulfilled the inclusion criteria, two reviewers (CP, JZ) extracted the data into an electronic data collection form, which was piloted by both reviewers (Supplementary Material 2). The data collection was revised, based on feedback from the reviewers. Study authors were contacted electronically to obtain relevant but unavailable data.

### **Risk of bias assessment for included studies**

Two reviewers (CP, JZ) independently conducted the risk of bias assessment for each study at the outcome level using the Revised Cochrane risk-of-bias tool for randomized trials (RoB 2).<sup>16</sup>

### **Measures of treatment effect**

Dichotomous data was analyzed by calculating the prevalence rate ratio, using the longest follow-up time reported, as well as the 95% confidence interval. The prevalence rate ratio (RR) for smoking cessation was calculated as such:

Smoking cessation in individuals who use vaping, as compared to traditional nicotine replacement therapies; a systematic review and meta-analysis 5

$$RR = \frac{N \text{ of subjects abstaining from smoking in intervention} / N \text{ of subjects in intervention}}{N \text{ of subjects abstaining from smoking in control} / N \text{ of subjects in control}}$$

Continuous data for the secondary outcomes were analyzed through mean differences between groups as the same scales were used. In the case of studies with multiple arms, we only extracted data for the groups relevant to this review.

### Data synthesis

We provide a synthesis of the included studies (Table 1). Where appropriate, data have been pooled for meta-analyses, and random effects were used for all analyses in RevMan.<sup>14</sup> The inverse-variance random-effects and the mean difference approach (using standard deviations and sample sizes) were used for dichotomous and continuous outcomes, respectively, to assign the weight given to each study. Participants with missing data were considered as still smoking.<sup>5</sup> The proportion of adverse events reported was based on the number of people available for outcome assessment. For the reduction of the number of cigarettes smoked, missing values were assumed to be zero.

### Assessment of heterogeneity

A p value of 0.10 for the chi-squared test (Cochrane Q) and an I<sup>2</sup> value of >50% were used as indicators of substantial heterogeneity. This however needs to be interpreted with caution given the small number of studies available for the meta-analysis. Clinical and methodological diversity was also explored.

We planned to assess reporting/publication bias using funnel plots of effect estimate against standard error, and testing for funnel plot asymmetry, however, the number of included studies was too low (<10).

We also planned on conducting a number of sensitivity analyses to determine the robustness of the results of the meta-analyses; subgroup analyses to investigate potentially modifying factors such as age and smoking intensity; as well as meta-regression to study the impact of covariates such as motivation to quit smoking, provision of training, and other factors,<sup>17</sup> but minimum data thresholds were not met.

We present a 'Summary of Findings' table (Table 2) for all outcomes. We used the five GRADE considerations (study limitations, consistency of effect, imprecision, indirectness, and publication bias)<sup>14</sup> to assess the quality of evidence for each outcome and to draw conclusions about the robustness of evidence within this review.

## RESULTS

Our initial bibliographic search yielded 270 records, and after screening and full-text review, we retained 6 RCTs. An updated search conducted in June 2020 yielded an additional 116 records (for a total of 386 records), none of which were included after screening (Figure 1).

Smoking cessation in individuals who use vaping, as compared to traditional nicotine replacement therapies; a systematic review and meta-analysis 6

We identified six RCTs (Bullen 2013,<sup>18</sup> Eisenhofer 2015,<sup>19</sup> Hajek 2019,<sup>4</sup> Hatsukami 2019,<sup>20</sup> Lee SH 2019,<sup>21</sup> Lee SM 2018<sup>22</sup>). Of these, five contributed data to our primary outcome of smoking cessation.<sup>4,18,20-22</sup> Four studies<sup>4,18,21,22</sup> examined cessation at 6 months or longer, while one<sup>20</sup> examined short term cessation (< 6 months). Table 1 includes the salient features of the included studies. A more detailed description of included studies can be found in Supplementary Material 3.

**Table 1. Characteristics of included studies**

| <b>Characteristics of RCTs measuring smoking cessation at 6 months or later</b> |                                  |                   |                                                        |                                                                                             |                                         |                                                       |                                               |
|---------------------------------------------------------------------------------|----------------------------------|-------------------|--------------------------------------------------------|---------------------------------------------------------------------------------------------|-----------------------------------------|-------------------------------------------------------|-----------------------------------------------|
| <b>Author and year of publication</b>                                           | <b>Design</b>                    | <b>Country</b>    | <b>Number of participants</b>                          | <b>Main eligibility criteria</b>                                                            | <b>Intervention</b>                     | <b>Comparator</b>                                     | <b>Main outcome of interest</b>               |
| <b>Bullen, 2013<sup>17</sup></b>                                                | 3-group, parallel, single center | Australia         | 657 total, 584 included in this review (2 of 3 groups) | ≥ 18 years, smoked ≥ 10 cigarettes per day in the past year, motivated to quit              | First-generation e-cigarette x 12 weeks | Nicotine patch x 12 weeks                             | Continuous abstinence 6 months after quit day |
| <b>Hajek 2019<sup>4</sup></b>                                                   | 2-group, parallel, multi-centre  | United Kingdom    | 884                                                    | Adults with no strong preference towards e-cigarette or NRT                                 | Any type of e-cigarette                 | Any nicotine-replacement therapy                      | Continuous abstinence 52 weeks after quit day |
| <b>Lee SH, 2019<sup>20</sup></b>                                                | 2-group, parallel, single center | Republic of Korea | 150                                                    | ≥ 18 years, smoked ≥ 10 cigarettes per day in the past year, motivated to quit              | e-cigarette x 24 weeks                  | Nicotine gum x 24 weeks                               | Continuous abstinence 24 weeks after quit day |
| <b>Lee SM, 2018<sup>21</sup></b>                                                | 2 group, parallel, single center | USA               | 30                                                     | Adults, smoked ≥ 2 cigarettes per day in the past year, smoked at least once in last 7 days | e-cigarette x 6 weeks                   | Nicotine patch x 5 weeks, then placebo patch x 1 week | 7-day point prevalence abstinence at 6 months |
| <b>Characteristics of RCT measuring smoking cessation earlier than 6 months</b> |                                  |                   |                                                        |                                                                                             |                                         |                                                       |                                               |

Smoking cessation in individuals who use vaping, as compared to traditional nicotine replacement therapies; a systematic review and meta-analysis 7



|                                                        |                                  |     |                                                        |                                                |                        |                                  |                                                             |
|--------------------------------------------------------|----------------------------------|-----|--------------------------------------------------------|------------------------------------------------|------------------------|----------------------------------|-------------------------------------------------------------|
| <b>Hatsukami, 2019<sup>19</sup></b>                    | 4 group, parallel, multi-center  | USA | 264 total, 152 included in this review (2 of 4 groups) | ≥ 18 years, smoked ≥ 5 cigarettes per day      | e-cigarettes           | Nicotine gum or nicotine lozenge | 7-day point prevalence abstinence at 8 months               |
| <b>Characteristics of RCT measuring other outcomes</b> |                                  |     |                                                        |                                                |                        |                                  |                                                             |
| <b>Eisenhofer, 2015<sup>18</sup></b>                   | 2-group, parallel, single center | USA | 11                                                     | Veterans who met criteria for tobacco disorder | e-cigarettes x 3 weeks | Nicotine patch x 3 weeks         | Reduction in number of cigarettes smoked per day at 3 weeks |

### Risk of bias in included studies

We assessed risk of bias for each included study. A detailed report of the risk of bias assessment can be found in Supplementary Material 4.

Figure 2 illustrates the risk of bias for each outcome.

### Effect of Interventions

#### Smoking cessation

Five of the six studies reported on smoking cessation.<sup>4,18,20-22</sup> When comparing e-cigarettes to NRT in the context of smoking cessation, there was no significant difference between groups in verified self-reported continuous abstinence at 6 months (21/289 vs 17/295, RR 1.26 [0.68, 2.34],  $p=0.46$ ) in the Bullen 2013<sup>18</sup> study, and in continuous abstinence from 9 to 24 weeks (16/75 vs 21/75, RR 0.76 [0.43, 1.34],  $p = 0.344$ ) in the Lee SH 2019<sup>21</sup> study. In addition, the Lee SM 2018<sup>22</sup> study showed no difference between groups for the 7-day point prevalence abstinence at 6 months in the context of perioperative smoking cessation (5/20 vs 1/10, RR 2.50 [0.34, 18.63],  $p = 0.63$ ).

In the Hajek 2019<sup>4</sup> study, self-reported, verified continuous abstinence at 1 year was found to be higher in the e-cigarette group (79/438 vs 44/446, RR 1.83 [1.30, 2.58],  $P<0.001$ ), and smoking cessation assessed by 7-day point prevalence at 8 weeks in the Hatsukami 2019<sup>20</sup> trial was also higher in the e-cigarette group (25/76 vs 13/76, RR 1.92 [1.07, 4.37],  $p = 0.039$ ).

We combined data from all 5 studies comparing smoking cessation between e-cigarettes and NRT and obtained a pooled RR of 1.42 [0.97, 2.09] (Figure 3).

#### Smoking reduction

All six studies<sup>4,18-22</sup> assessed smoking reduction. Bullen 2013,<sup>18</sup> Eisenhofer,<sup>19</sup> Hajek 2019,<sup>4</sup> and Lee SM 2018<sup>22</sup> reported the proportion of participants reducing smoking by at least 50%. While Lee SH 2019<sup>21</sup> also reported on this outcome, the size of the reduction was not specified. Bullen 2013<sup>18</sup> and Lee SH 2019<sup>21</sup> reported an absolute reduction, and Hatsukami 2019<sup>20</sup> reported a relative reduction in cigarettes per day from baseline.

Smoking cessation in individuals who use vaping, as compared to traditional nicotine replacement therapies; a systematic review and meta-analysis 8

1  
2  
3 In the Bullen 2013 study,<sup>18</sup> mean cigarette consumption at 6 months decreased by 9.7 (SE 0.4)  
4 in the e-cigarette group, and by 7.7 (SE 0.4) in the NRT group. Mean difference between groups  
5 was 1.9 (SE 0.6) ( $p = 0.002$ ). After excluding people who successfully quit smoking, the RR of  
6 decreasing cigarette smoking by at least 50% when comparing the e-cigarette to the NRT  
7 groups was 1.61 [1.31, 1.99].  
8  
9

10 Eisenhofer 2015<sup>19</sup> compared week 3 to week 1, and showed that both e-cigarettes ( $t = 5.3$ ,  $p =$   
11  $0.013$ ) and NRT ( $t = 3.4$ ,  $p = 0.015$ ) significantly reduced ( $\sim 50\%$ ) self-reports of cigarettes  
12 smoked in the previous 24 hours. This was confirmed by significant reductions of breath CO  
13 levels in both groups. No additional information could be obtained from the abstract and none  
14 of the authors could be reached.  
15  
16  
17

18 In the Hajek 2019<sup>4</sup> study, 44 of 345 participants in the e-cigarette group, and 29 of 393  
19 participants in the NRT group experienced a carbon monoxide-validated reduction in smoking  
20 of  $\geq 50\%$  in participants without abstinence between weeks 26 and 52, yielding a relative risk of  
21 smoking reduction of 1.73 (1.11-2.70).  
22  
23

24 Hatsukami 2019<sup>20</sup> defined smoking reduction by the estimated ratio of cigarettes smoked at 8  
25 weeks as compared to baseline, with a result of 0.25 (0.17, 0.37) in the e-cigarette group, and  
26 0.29 (0.21, 0.39) in the NRT group ( $p = 0.185$ ). Additional data obtained from the author  
27 showed that 19 participants in the e-cigarette group and 22 participants in the NRT group  
28 reduced smoking consumption by 50% (RR 0.86 [0.51, 1.46]) at 8 weeks, and that mean  
29 cigarette consumption decreased by 9.22 (SD 7.95) in the e-cigarette group, and by 7.61 (SD  
30 8.27) in the NRT group. The mean difference between groups was 1.61 [-0.97, 4.19] .  
31  
32  
33

34 In the Lee SH 2019<sup>21</sup> study, mean cigarette consumption decreased at 24 weeks by 6.5 +/- 2.87  
35 (SD) in the e-cigarette group, and by 6.60 +/- 3.75 (SD) in the NRT group ( $p = 0.974$ ). In  
36 addition, 31 out of 75 participants (41.3%) in the e-cigarette group and 19 out of 75 participants  
37 (25.3%) in the NRT group reduced their daily cigarette consumption ( $p = 0.038$ ), but no  
38 information on size of smoking reduction is provided. After excluding abstainers, a RR of 1.49  
39 [0.97, 2.31] was obtained for decrease in daily cigarette consumption.  
40  
41

42 Lastly, in the Lee SM 2018,<sup>22</sup> 1 participant in the END group and 4 participants in the NRT group  
43 reduced their cigarette consumption by at least half, resulting in a RR 0.15 [0.02, 1.14].  
44  
45

46 We combined data from the Bullen 2013,<sup>18</sup> Hajek 2019,<sup>4</sup> Hatsukami 2019<sup>20</sup> and Lee SM 2018<sup>22</sup>  
47 studies comparing smoking reduction of at least 50% between e-cigarettes and NRT, as they  
48 used similar measures. Pooled results comparing the difference in smoking reduction between  
49 the e-cigarette and the NRT groups produced a RR of 1.25, with the line of equivalence falling  
50 within the confidence interval [0.79, 1.98] (Figure 3).  
51  
52

53 We also combined data from the Bullen 2013,<sup>18</sup> Hatsukami 2019,<sup>20</sup> and Lee SH 2019<sup>21</sup>  
54 comparing mean reduction of cigarettes per day from baseline for ENDS and NRT. Meta-analysis  
55  
56

57 Smoking cessation in individuals who use vaping, as compared to traditional nicotine replacement therapies; a 9  
58 systematic review and meta-analysis  
59  
60

1  
2  
3 yielded a MD of 1.11, with the line of equivalence falling within the confidence interval [-0.41,  
4 2.63] (Figure 3).  
5  
6  
7  
8  
9  
10  
11  
12  
13  
14  
15  
16  
17  
18  
19  
20  
21  
22  
23  
24  
25  
26  
27  
28  
29  
30  
31  
32  
33  
34  
35  
36  
37  
38  
39  
40  
41  
42  
43  
44  
45  
46  
47  
48  
49  
50  
51  
52  
53  
54  
55  
56

57 Smoking cessation in individuals who use vaping, as compared to traditional nicotine replacement therapies; a 1  
58 systematic review and meta-analysis

### Harms

Five studies reported on harms (Bullen 2013,<sup>18</sup> Hajek 2019,<sup>4</sup> Hatsukami 2019,<sup>20</sup> Lee SH 2019,<sup>21</sup> Lee SM 2018<sup>21</sup>). None of the included studies reported serious adverse events (SAEs) related to e-cigarettes or NRT.

In the Bullen 2013<sup>18</sup> study, 107 participants in the e-cigarette group reported 137 adverse events, while 96 participants in the NRT group (patches) reported 119 events, and, using the number of participants available for analysis at 6 months, there was no difference in the incidence of adverse events between groups (RR 0.99, [0.81, 1.22]). No difference between groups was also observed in the Hatsukami 2019<sup>20</sup> study, where additional data provided by the author showed that 51 of 69 participants in the e-cigarette group and 53 of 72 participants in the NRT group reported adverse events (1.00 [0.82, 1.22]), and in the Lee SM 2018<sup>22</sup> study, where no significant difference in the incidence of adverse events between groups was seen at 8 weeks (RR 1.24 [0.54, 2.84]).

Hajek 2019<sup>4</sup> defined adverse events of interest as nausea, sleep disturbances, and throat and mouth irritation. There were 27 SAEs in the e-cigarette group and 22 in the NRT group, none felt to be related to the intervention or control products. Based on the number of participants available at the 12 month follow-up, e-cigarettes were found to be less likely associated with nausea (RR 0.78 [0.66, 0.92]) and sleep disturbances (RR 0.88 [0.83, 0.95]), but more likely associated with throat/mouth irritation (RR 1.24 [1.13, 1.37]). These numbers however should be interpreted with caution as it was not possible to determine with certainty the denominator from the data.

In the Lee SH 2019 study,<sup>21</sup> 5 participants in the e-cigarette group and 13 participants in the nicotine gum group reported adverse events. There were no SAEs. Based on the number of participants who completed the study, e-cigarettes were less likely to be associated with adverse events (RR 0.13 [0.12, 0.87]).

We combined data from the Bullen 2013,<sup>18</sup> Hatsukami 2019,<sup>20</sup> Lee SH 2019,<sup>21</sup> Lee SM 2018<sup>22</sup> studies comparing harms between e-cigarettes and NRT. Hajek 2019<sup>4</sup> was excluded as they did not clearly report the number of participants that experienced any adverse events and reported only on specific adverse events. Pooled results comparing ENDS to NRT yielded a RR of 0.96 [0.76, 1.20] (Figure 3).

### Withdrawal symptoms

Four studies reported on the results of withdrawal symptoms (Eisenhofer 2015,<sup>19</sup> Hajek 2019,<sup>4</sup> Hatsukami 2019,<sup>20</sup> and Lee SM 2018<sup>22</sup>) and all used different scales. Eisenhofer 2015<sup>19</sup> assessed withdrawal with the Questionnaire on Smoking Urges (QSU), Hajek<sup>4</sup> used a composite urge score (frequency and strength of urge to smoke), Hatsukami 2019<sup>20</sup> measured the severity of withdrawal using the Minnesota Nicotine Withdrawal Scale, and Lee SM 2018<sup>21</sup> assessed withdrawal symptoms as part of their adverse event assessment. In light of the differences in outcome assessment measures, the data were not pooled.

1  
2  
3 In Eisenhofer 2015,<sup>19</sup> urges and cravings to smoke were significantly reduced in the e-cigarette  
4 group ( $t=3.8$ ,  $p = 0.03$ ), but not in the NRT group ( $t=2.1$ ,  $p = 0.08$ ).  
5

6  
7 In Hajek 2019,<sup>4</sup> urges for e-cigarette users decreased more than for NRT users at 1 week (MD: -  
8 0.4 (-0.6 to -0.2)) and at 4 weeks (MD: -0.3 (-0.5 to -0.1)). E-cigarette users also reported a  
9 smaller increase from baseline in irritability, restlessness, inability to concentrate, hunger, and  
10 depression. The withdrawal symptoms disappeared mostly for both groups by week 4.  
11

12  
13 In Hatsukami 2019,<sup>20</sup> participants in the e-cigarette group reported lower median [min/max]  
14 changes from baseline on the severity scale compared to participants in the NRT group at all  
15 measurement points, with week 1 (3.0 [-9.0/25.0] vs 3.5 [-20.0/32.0]), week 2 (1.0 [-13.0/25.0]  
16 vs 3.0 [-13.0/39.0]), and week 4 (1.0 [-17.0/30.0] vs 2.5 [-28.0/29.0]). The planned pairwise  
17 comparisons were significant with  $p < 0.017$ . As well, fewer participants (5.3%) withdrew from  
18 the complete substitution e-cigarettes group than from the NRT group (15.8%) for product  
19 related reasons (disliking product or experiencing withdrawal symptoms;  $p$  value not reported).  
20  
21

22 Lee SM 2018<sup>22</sup> only reported on withdrawal symptoms for the NRT group, and did not report on  
23 withdrawal symptoms for the e-cigarette group.  
24  
25

### 26 Acceptance of therapy

27 Four studies reported on acceptance of therapy (Bullen 2013,<sup>18</sup> Hajek 2019,<sup>4</sup> Hatsukami 2019,<sup>20</sup>  
28 and Lee SM 2018<sup>22</sup>), and all used different scales. In light of the difference in outcome  
29 assessment measures, the data were not pooled.  
30  
31

32 In the Bullen 2013<sup>18</sup> study, 230 out of 260 participants (88%) in the e-cigarettes group said they  
33 would recommend their allocated product to a friend at 1 month, as compared to 130 out of  
34 232 participants (56%) in the NRT group (RR 1.58 [1.40, 1.78]). At 6 months, 205 out of 241  
35 participants (85%) in the e-cigarettes group said they would recommend their allocated product  
36 as compared to 107 out of 215 participants (50%) in the NRT group (RR 1.71 [1.48, 1.97]).  
37  
38

39 In the Hajek 2019 study,<sup>4</sup> acceptance of therapy was measured with a Likert scale (1 to 5, with a  
40 higher score associated with higher acceptance). At 4 weeks post quit date, helpfulness of e-  
41 cigarettes was rated 4.3 (SD 0.9) while that of NRT was 3.7 (SD 0.9) (mean difference 0.6 (0.4,  
42 0.7)). Taste was scored at 3.5 (SD 1.3) for the e-cigarette group and 3.1 (SD 1.5) (mean  
43 difference 0.4 (0.2,0.6)), and satisfaction was rated at 2.7 (SD 1.1) and 2.3 (SD 1.2), respectively,  
44 for the e-cigarette and NRT groups (mean difference 0.5 (0.3, 0.6)).  
45  
46  
47

48 In the Hatsukami 2019 study<sup>20</sup>, acceptance of therapy was defined as satisfaction with the  
49 product, psychological reward, enjoyment of sensation, aversion, and ability to reduce craving.  
50 Results are reported for the NRT group as an estimated mean difference and 95% CI in product  
51 evaluation sub-scales using the e-cigarette group as a reference. The following results are  
52 reported; satisfaction: -0.6 (-1.0, -0.1), psychological reward: -0.4 (-0.8, 0.01), enjoyment of  
53 sensation: -0.6 (-1.1, -0.1), aversion: 0.1 (-0.2, 0.4), and ability to reduce craving: -0.3 (-0.8, 0.2).  
54  
55  
56

57 Smoking cessation in individuals who use vaping, as compared to traditional nicotine replacement therapies; a 1  
58 systematic review and meta-analysis

1  
2  
3 Lastly, the Lee SM 2018 trial<sup>22</sup> defined acceptance of therapy as satisfaction with the assigned  
4 product, measured with a Likert scale (1 to 7, with a higher score associated with higher  
5 satisfaction). Median scores and IQR are reported. Participants randomized to the e-cigarette  
6 group reported scores of 6 [4-7], 5.5 [2.5-7], and 6 [5-7], respectively, while participants  
7 randomized to the NRT group reported scores of 5 [3-7], 5 [3-6], and 7 [6-7], respectively for  
8 the following questions. "The product is helpful for quitting smoking", "I was satisfied with the  
9 product to help with quitting", "I would recommend the product to someone interested in  
10 quitting smoking".  
11  
12  
13

### 14 **Risk of bias across studies**

15 The review process we used was thorough, and we took every precaution to minimize the risk  
16 of bias due to publication bias or selective reporting. We reached out to clinical experts to  
17 enquire about unpublished reports, examined protocol registries, and contacted the authors of  
18 identified protocols to request unpublished results. Given the low number of retained studies,  
19 we did not include a funnel plot.  
20  
21  
22

### 23 **Sensitivity, subgroup and meta-regression analyses**

24 We performed a sensitivity analysis for the smoking cessation outcome by removing the Lee SM  
25 2018 study<sup>22</sup>. While the other 4 studies aimed to assess smoking cessation in general, Lee et al  
26 were targeting a peri-operative population, who may have had different motivations to quit  
27 smoking. The pooled data, once Lee SM 2018<sup>22</sup> is removed, yield a RR of smoking abstinence of  
28 1.39 [0.92, 2.11] when comparing ENDS to NRT (Figure 4).  
29  
30

31 We had planned on undertaking multiple subgroup analyses. We were unable to perform the  
32 subgroup analyses based on age (all participants were adults), smoking intensity (no study  
33 enrolled smokers  $\geq$  25 cigarettes per day), or biochemically validated smoking cessation (all  
34 studies used biochemical validation). We also could not perform a subgroup analysis of studies  
35 with ties to industry as only Bullen 2013<sup>18</sup> was found to have ties to the vaping industry.  
36  
37

38 We did, however, perform the following subgroup analyses: limiting comparator to nicotine  
39 patches (Bullen 2013<sup>18</sup> and Lee SM 2018<sup>21</sup>), and including only studies assessing  
40 continuous/sustained smoking abstinence  $\geq$  6 months given that smoking cessation is defined  
41 as sustained abstinence for at least 6 months;<sup>23</sup> (Bullen 2013,<sup>18</sup> Hajek 2019,<sup>4</sup> Lee SH 2019<sup>21</sup>)  
42 (Figure 4).  
43  
44

45 Metaregression analyses were not performed as our threshold of 10 eligible studies was not  
46 met.  
47  
48

## 49 **DISCUSSION**

50 In our review, there was no significant difference in smoking cessation, smoking reduction, or  
51 harms between e-cigarette and NRT users. However, we report on results from a limited  
52 number of RCTs, and the level of evidence is low. Our efficacy results are similar to those  
53 described in a 2016 Cochrane review,<sup>5</sup> which also showed no difference between abstinence  
54 rates between the nicotine e-cigarette group and NRT group. Their review only included one  
55 Smoking cessation in individuals who use vaping, as compared to traditional nicotine replacement therapies; a  
56 systematic review and meta-analysis  
57  
58  
59

1  
2  
3 study<sup>18</sup>, also included in our review for this particular outcome. Similar to the evidence we are  
4 presenting, none of the studies examined in the Cochrane review reported serious adverse  
5 events considered to be related to e-cigarette use.  
6  
7

8 Although our meta-analysis of the 5 trials that examined **smoking cessation** showed no  
9 significant difference between e-cigarette and nicotine replacement therapy, there was a trend  
10 towards favoring e-cigarettes. Interestingly, our sensitivity analysis limiting inclusion to studies  
11 reporting smoking cessation of 6 months or greater yielded a smaller point estimate than the  
12 one obtained from the main analysis, although still with no difference between groups. It could  
13 be hypothesized that additional benefits that may be attributed to e-cigarette early on in  
14 smoking cessation may be attenuated as time progresses. This again should be interpreted  
15 with caution given the small number of studies<sup>4,18,20</sup> and the very significant heterogeneity.  
16  
17  
18

19 In all comparisons, our results need to be interpreted carefully. There was significant clinical  
20 heterogeneity between studies in terms of the population enrolled, smoking intensity at  
21 baseline, type and nicotine concentration of e-cigarettes, type and dose of NRT, as well as  
22 methodological heterogeneity in terms of study conduct, and intervention and control  
23 protocols. For instance, one of the included studies<sup>18</sup> used first-generation e-cigarettes, with  
24 nicotine delivery about 20% of that obtained from cigarette smoking. While e-cigarette users  
25 were couriered the supplies needed, NRT users had to redeem vouchers from community  
26 pharmacies to obtain their patches. The low nicotine content of the e-cigarettes, the extra step  
27 in obtaining NRT supplies, and the low intensity of additional co-interventions likely contributed  
28 to the low rate of smoking abstinence at 6 months in both groups, limiting the generalizability  
29 of the results. Another included study<sup>4</sup> allowed for multiple types and concentrations of ENDS,  
30 as well as upwards of 10 NRT products and doses, complicating the interpretation of the  
31 results. Nicotine concentrations reported in the trials ranged from 0.01 to 48 mg/mL,<sup>4,18,20-22</sup>  
32 making comparisons between studies difficult.  
33  
34  
35  
36

37 Given that the risk of bias was assessed as high in 5 of 6 included studies<sup>4,18-21</sup>, our smoking  
38 cessation outcome results need to be interpreted with caution. In addition, it is interesting to  
39 note that all studies verified self-reported smoking cessation with an exhaled carbon monoxide  
40 test, however different cut-off values were used. Additionally, there are limitations to using  
41 carbon monoxide (CO) as a way to verify smoking cessation. CO has a relatively short half-life  
42 and is eliminated from the body within 24 hours; it can, therefore, lead to false negative results.  
43 However, this issue is somewhat mitigated by the fact that smoking cessation study participants  
44 tend to be daily smokers.  
45  
46  
47

48 All studies included in this review examined **smoking reduction**. There was no difference  
49 between groups in the mean reduction of cigarettes from baseline in the studies that measured  
50 that outcome, or in the proportion of participants successfully reducing their smoking  
51 consumption.  
52  
53

54 None of the included studies reported severe **adverse events** related to ENDS or NRT, and, for  
55 the four studies with data that could be pooled, there was no difference between groups in  
56 Smoking cessation in individuals who use vaping, as compared to traditional nicotine replacement therapies; a  
57 systematic review and meta-analysis 3  
58  
59

1  
2  
3 terms of harms related to either therapy. However, in addition to the clinical heterogeneity  
4 mentioned above, there was significant methodological heterogeneity in how adverse events  
5 were collected. We evaluated the quality of the evidence as very low, given the high risk of bias  
6 of included studies, the significant heterogeneity, and the inability to accurately determine the  
7 number of subjects involved in this outcome, thus leading to result imprecision.  
8  
9

10 Since the included trials were powered to detect a difference in the primary outcome, it is  
11 possible that rare or unexpected harms were not detected due to a lack of power for this  
12 specific outcome. Also, it is important to acknowledge that these studies are limited by their  
13 short time-frame. Data on long-term side effects of ENDS are lacking. The recent e-cigarette, or  
14 vaping product use-associated lung injury (EVALI) epidemic, is a reminder that further research  
15 is needed before widespread recommendations can be made with regards to the use of  
16 ENDS. In addition, there are now emerging concerns that respiratory disease caused by the  
17 novel coronavirus SARS-CoV-2, the virus responsible for the COVID-19 pandemic, could be  
18 exacerbated by exposure to ENDS.<sup>24-26</sup>  
19  
20  
21

22 Finally, although there seemed to be **increased acceptance of therapy** towards e-cigarettes in  
23 the four studies that considered it,<sup>4,18,20,22</sup> high risk of bias, significant heterogeneity, and the  
24 small number of studies using widely different scales leading to imprecise measures, mean that  
25 the results should be interpreted with extreme caution. In addition, given that the trials were  
26 unblinded, participants who were disappointed with their treatment allocation may have  
27 reported less acceptability than their counterparts.  
28  
29  
30

### 31 **Limitations at review level**

32 We restricted our search to RCTs to try to minimize the risk of bias, however, this considerably  
33 limited the number of available studies for this review. It is surprising that, given the  
34 widespread availability of e-cigarettes and how aggressively they have been marketed as  
35 smoking cessation agents, there are so few head-to-head trials comparing ENDS and traditional  
36 NRT. While there may be some unpublished studies that our review did not capture, our  
37 literature search was thorough and included personal communications to multiple experts in  
38 the field.  
39  
40  
41

42 Our review identified 7 ongoing trials<sup>27-33</sup> that potentially met our inclusion criteria, totaling  
43 over 1500 targeted participants. None of the investigators had any data ready to be shared,  
44 however it is hoped that this ongoing research can shed light on the effectiveness of ENDS as  
45 smoking cessation tools, as compared to traditional NRTs. Long-term research is also needed to  
46 investigate the long-term effects of ENDS, as well as the optimal dosing and method of  
47 delivery.  
48  
49  
50

### 51 **Conclusion**

52 We found no difference in smoking cessation, harms, and smoking reduction between e-  
53 cigarette and NRT users. However, the quality of the evidence was low. Further research is  
54 needed before widespread recommendations can be made with regards to the use of ENDS.  
55 Research is also needed to investigate the long-term effects of ENDS, as well as optimal dosing.  
56 Smoking cessation in individuals who use vaping, as compared to traditional nicotine replacement therapies; a  
57 systematic review and meta-analysis 4  
58  
59  
60



Table 2- Summary of Findings Table

**Nicotine-containing Electronic cigarettes (ENDS) vs Nicotine Replacement Therapies (NRT) for smoking cessation**

| <b>Population:</b> Current smokers at enrolment into trials  |                                 |                                         |                                        |                                                                                                                                                                                                                  |
|--------------------------------------------------------------|---------------------------------|-----------------------------------------|----------------------------------------|------------------------------------------------------------------------------------------------------------------------------------------------------------------------------------------------------------------|
| <b>Intervention:</b> Nicotine-containing e-cigarettes        |                                 |                                         |                                        |                                                                                                                                                                                                                  |
| <b>Comparison:</b> Nicotine-replacement therapies            |                                 |                                         |                                        |                                                                                                                                                                                                                  |
| <b>Outcomes</b>                                              | <b>Relative effect (95% CI)</b> | <b>Number of participants (studies)</b> | <b>Quality of the evidence (GRADE)</b> | <b>Comments</b>                                                                                                                                                                                                  |
| <b>Cessation</b>                                             | RR 1.42 [0.97, 2.09]            | 1800 (5 studies)                        | ⊕⊕ OO <sup>1,2</sup><br>low            |                                                                                                                                                                                                                  |
| <b>Smoking reduction</b>                                     |                                 |                                         |                                        |                                                                                                                                                                                                                  |
| Proportion of people decreasing cigarette consumption by 50% | RR 1.25 [0.79, 1.98]            | 1460 (4 studies)                        | ⊕⊕ OO <sup>1,2</sup><br>low            |                                                                                                                                                                                                                  |
| Mean decrease in cigarettes per day                          | MD 1.11 [-0.41, 2.63]           | 633 (3 studies)                         | ⊕⊕ OO <sup>1,2</sup><br>low            |                                                                                                                                                                                                                  |
| <b>Adverse events (AEs)</b>                                  | RR 0.96 [0.76, 1.20]            | 758 (4 studies)                         | ⊕ OOO <sup>1,2,3</sup><br>Very low     | No severe adverse events related to investigated products were reported                                                                                                                                          |
| <b>Withdrawal symptoms</b>                                   | Summary data not available      | 4 studies                               | ⊕ OOO <sup>1,2,3</sup><br>Very low     | Withdrawal measures included Minnesota Nicotine Withdrawal Scale, QSU scores, frequency of urge and strength of urge score, and pre-specified symptoms of depressed mood, irritability, restlessness, and hunger |

Smoking cessation in individuals who use vaping, as compared to traditional nicotine replacement therapies; a systematic review and meta-analysis 5

|    |                              |               |           |                        |                                                                                                                                                                                                           |
|----|------------------------------|---------------|-----------|------------------------|-----------------------------------------------------------------------------------------------------------------------------------------------------------------------------------------------------------|
| 1  |                              |               |           |                        |                                                                                                                                                                                                           |
| 2  |                              |               |           |                        |                                                                                                                                                                                                           |
| 3  | <b>Acceptance of therapy</b> | Summary data  | 4 studies | ⊕ ○○○ <sup>1,2,3</sup> | Acceptance defined as wanting to recommend product to friends, helpfulness, taste, satisfaction, psychological reward, enjoyment of sensation, aversion, and ability to reduce craving depending on study |
| 4  |                              | not available |           | Very low               |                                                                                                                                                                                                           |
| 5  |                              |               |           |                        |                                                                                                                                                                                                           |
| 6  |                              |               |           |                        |                                                                                                                                                                                                           |
| 7  |                              |               |           |                        |                                                                                                                                                                                                           |
| 8  |                              |               |           |                        |                                                                                                                                                                                                           |
| 9  |                              |               |           |                        |                                                                                                                                                                                                           |
| 10 |                              |               |           |                        |                                                                                                                                                                                                           |
| 11 |                              |               |           |                        |                                                                                                                                                                                                           |
| 12 |                              |               |           |                        |                                                                                                                                                                                                           |
| 13 |                              |               |           |                        |                                                                                                                                                                                                           |
| 14 |                              |               |           |                        |                                                                                                                                                                                                           |
| 15 |                              |               |           |                        |                                                                                                                                                                                                           |
| 16 |                              |               |           |                        |                                                                                                                                                                                                           |

---

#### GRADE Working Group grades of evidence

High quality: Further research is very unlikely to change our confidence in the estimate of effect.

Moderate quality: Further research is likely to have an important impact on our confidence in the estimate of effect and may change the estimate.

Low quality: Further research is very likely to have an important impact on our confidence in the estimate of effect and is likely to change the estimate.

Very low quality: We are very uncertain about the estimate.

---

<sup>1</sup>Downgraded one level because of risk of bias

<sup>2</sup>Downgraded one level because of heterogeneity

<sup>3</sup>Downgraded one level because of imprecision of results

#### Data availability

Data collection forms and all raw data can be requested through the corresponding author

#### Acknowledgements

We thank Katie O'Hearn, MSc, (Children's Hospital of Eastern Ontario Research Institute), Dr Matthew McInnes, and Dr Dean Fergusson (University of Ottawa), for methodological assistance.

#### Figure captions

**Figure 1:** Study Flow Diagram

**Figure 2:** Risk of bias for each outcome

**Figure 3:** Pooled results per outcome

**Figure 4:** Sensitivity and Subgroup Analyses

## REFERENCES

1. Government of Canada. Canadian Tobacco, Alcohol and Drugs Survey (CTADS): summary of results for 2017. <https://www.canada.ca/en/health-canada/services/canadian-tobacco-alcohol-drugs-survey/2017-summary.html#n2> (accessed June 30, 2020)
2. Caponnetto P, Campagna D, Papale G, Russo C; Polosa R. The emerging phenomenon of electronic cigarettes. *Expert Rev Respir Med.* 2012; 6: 63–74.
3. Kalkhoran, Sara; Glantz, Stanton A. E-cigarettes and smoking cessation in real-world and clinical settings: a systematic review and meta-analysis. *Lancet Resp Med.* 2016; 4: 116–128.
4. Hajek P, Phillips-Waller A, Przulj D, Pesola F, Myers Smith K, et al. A Randomized Trial of E-Cigarettes versus Nicotine-Replacement Therapy. *N Engl J Med* 2019; 380: 629-637
5. Hartmann-Boyce J, McRobbie H, Bullen C, Begh R, Stead LF, Hajek P. Electronic cigarettes for smoking cessation. *Cochrane Database Syst Rev.* 2016; 14:9: CD010216
6. Centers for Disease Control and Prevention. Smoking & Tobacco use. Outbreak of Lung Injury Associated with E-Cigarette Use, or Vaping [https://www.cdc.gov/tobacco/basic\\_information/e-cigarettes/severe-lung-disease.html#latest-outbreak-information](https://www.cdc.gov/tobacco/basic_information/e-cigarettes/severe-lung-disease.html#latest-outbreak-information) (accessed June 30, 2020)
7. Government of Canada. Severe lung illness related to vaping. <https://www.canada.ca/en/public-health/services/diseases/vaping-pulmonary-illness.html> (accessed June 30, 2020)
8. National Academies of Sciences, Engineering, and Medicine. 2018. Public health consequences of e-cigarettes. Washington, DC: The National Academies Press.
9. Gotts JE, Jordt SE, McConnell R, Tarran R. What are the respiratory effects of e-cigarettes? *BMJ* 2019; 366: I5275
10. Schober W, Szendrei K, Matzen W, Osiander-Fuchs H, Heitmann D, et al. Use of electronic cigarettes (e-cigarettes) impairs indoor air quality and increases FeNO levels of e-cigarette consumers. *In t J Hyg Environ Health.* 2014; 217: 628-637
11. Bhatti DN, Glantz SA. Association of E-cigarette Use with Respiratory Disease Among Adults: A Longitudinal Analysis. *Am J Prev med.* 2020; 58:182.190.
12. Pound CM, Zhang J, Kodua AT, Sampson M. Smoking cessation in individuals who use vaping as compared to traditional nicotine replacement therapies; protocol for a systematic review and meta-analysis. <https://osf.io/mw4vr/>
13. Caponnetto P, Campagna D, Papale G, Russo C; Polosa R. The emerging phenomenon of electronic cigarettes. *Expert Rev Respir Med.* 2012; 6: 63–74.
14. Higgins J, Green S. (2019). *Cochrane Handbook for Systematic Reviews of Interventions.* John Wiley & Sons Ltd.
15. Bramer WM, De Jonge GB, Rethlefsen ML, Mast F, Kleijnen J. A systematic approach to searching: an efficient and complete method to develop literature searches. *J Med Libr Assoc.* 2018;106(4):531–41
16. Sterne JAC, Savović J, Page MJ, Elbers RG, Blencowe NS, et al. RoB 2: a revised tool for assessing risk of bias in randomised trials. *BMJ* 2019; 366: I4898.

Smoking cessation in individuals who use vaping, as compared to traditional nicotine replacement therapies; a systematic review and meta-analysis 7

17. Glanville JM, Duffy S, McCool R, Varley D. Searching ClinicalTrials.gov and the International Clinical Trials Registry Platform to inform systematic reviews: What are the optimal search approaches? *J Med Libr Assoc.* 2014;102(3):177-83.
18. Bullen C, McRobbie H, Laugesen M, McRobbie H, Parag V et al. Electronic cigarettes for smoking cessation: a randomised controlled trial. *Lancet* 2013; 382 (9905):1629-37.
19. Eisenhofer J, Makaanjuola T, Martinez V, Thompson-Lake DG, Rodgman C, et al. Efficacy of electronic cigarettes for smoking cessation in veterans. CPDD 77<sup>th</sup> Annual Meeting Abstracts. *Drug Alcohol Depend.* 2015; 156:e2-e101.
20. Hatsukami D, Meier E, Lindgren BR, Anderson A, Reisinger S, et al. A Randomized Clinical Trial Examining the Effects of Instruction for Electronic Cigarette Use on Smoking-Related Behaviors, and Biomarkers Exposure, *Nicotine Tob Res* 2019 Dec 12 [Online ahead of print].
21. Lee SH, Ahn SH, Cheong YS. Effect of Electronic Cigarettes on Smoking Reduction and Cessation in Korean Male Smokers: A Randomized Controlled Study. *J Am Board Fam Med.* 2019; 32(4): 567-574.
22. Lee SM, Tenney R, Wallace AW, Arjomandi M. E-cigarettes versus nicotine patches for perioperative smoking cessation: a randomized trial. *PeerJ.* 2018; 6:e5609.
23. Maseeh A, Kwatra G. A review of Smoking Cessation Interventions. *MedGenMed.* 2005;7:24.
24. McAlinden KD, Eapen MS, Lu W, Chia C et al. COVID-19 and Vaping: Risk for Increased Susceptibility to SARS-CoV-2 Infection? *Eur Resp J.* 2020; 2001645.
25. Kaur G, Lungarella G, Rahman I. SARS-CoV-2 COVID-19 Susceptibility and Lung Inflammatory Storm by Smoking and Vaping. *J Inflamm (Lond).* 2020;17:21.
26. Singh AG, Chatirvedi P. Tobacco use and vaping in the COVID-19 era. *Head Neck.* 2020;42(6):1240-1242.
27. ACTRN12617000849392. The QuitNic Study: A pilot study of electronic nicotine devices for smoking cessation with drug and alcohol clients
28. ISRCTN13288677. Can electronic cigarettes and nicotine replacement treatment help reduce smoking in smokers who struggle to quit?
29. ISRCTN62025374. Helping pregnant smokers quit: a multi-centre study of electronic cigarettes and nicotine patches
30. ACTRN12617001324303. Comparing electronic-cigarettes to traditional oral nicotine replacement therapy for smoking cessation among low-socioeconomic status smokers: a randomised controlled trial
31. NCT03249428. E-Cigarette Inner City NRT
32. ACTRN12619001787178. Project NEAT: NicotinE As Treatment for tobacco smoking following discharge from residential withdrawal services
33. NCT04236791. The ESTxENDS Trial- Electronic Nicotine Delivery Systems as an Aid for Smoking Cessation-extension of Follow-up

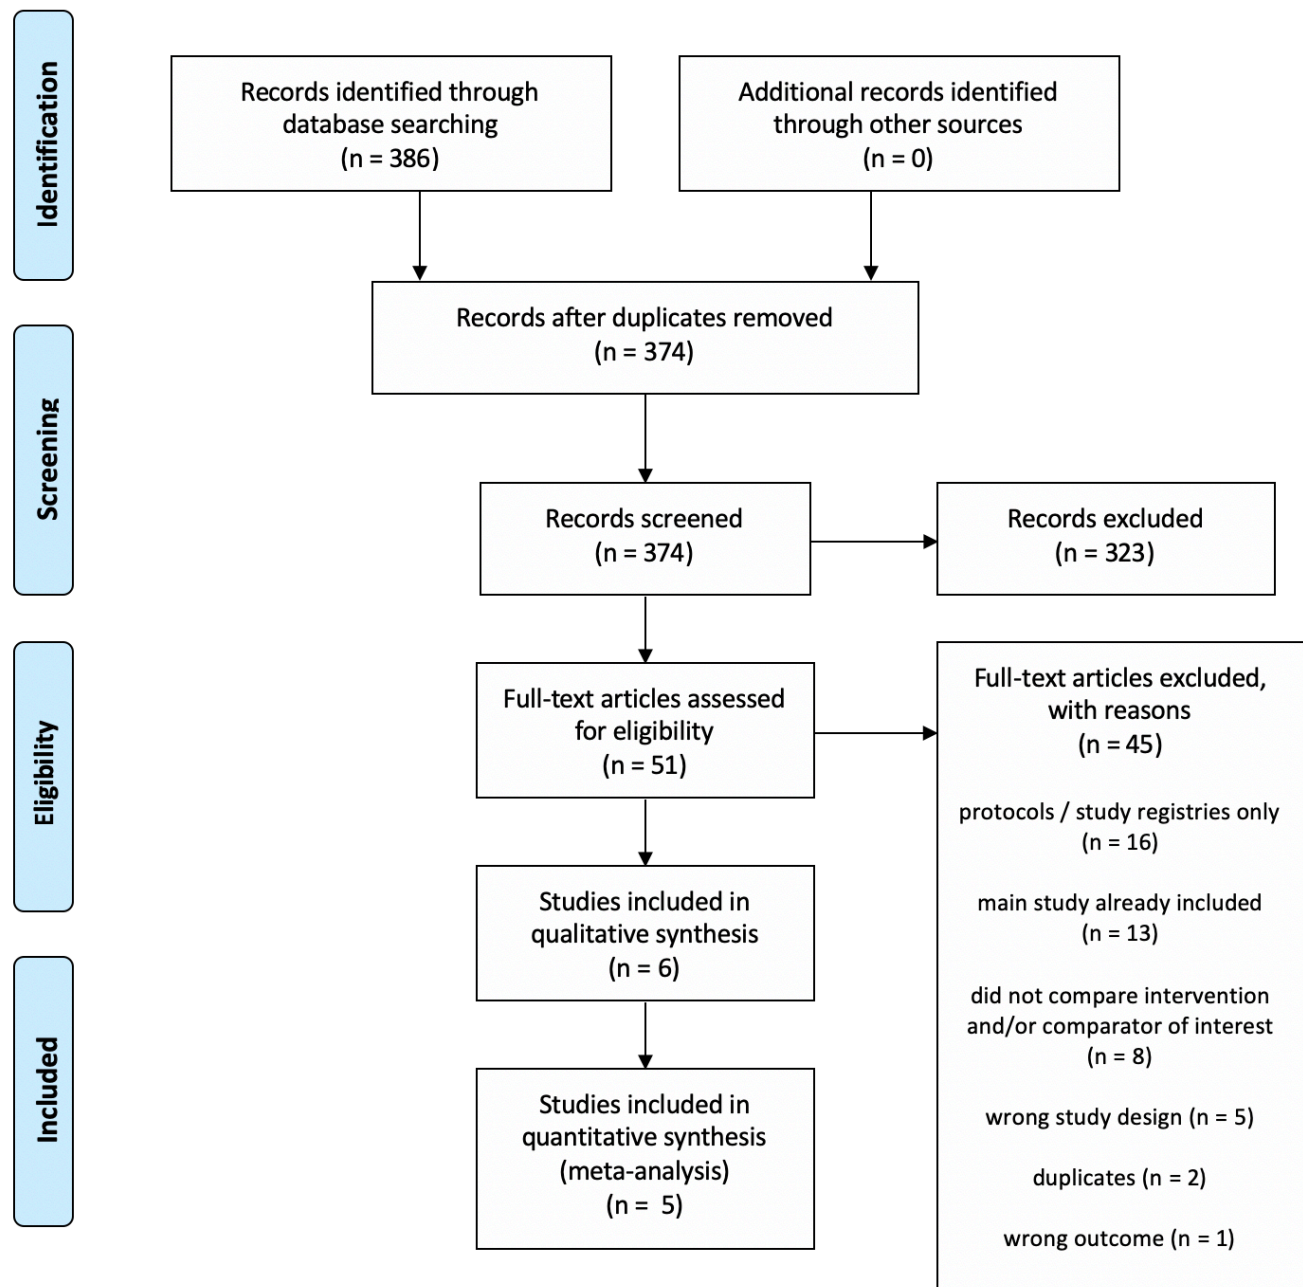

Figure 1. Study flow diagram

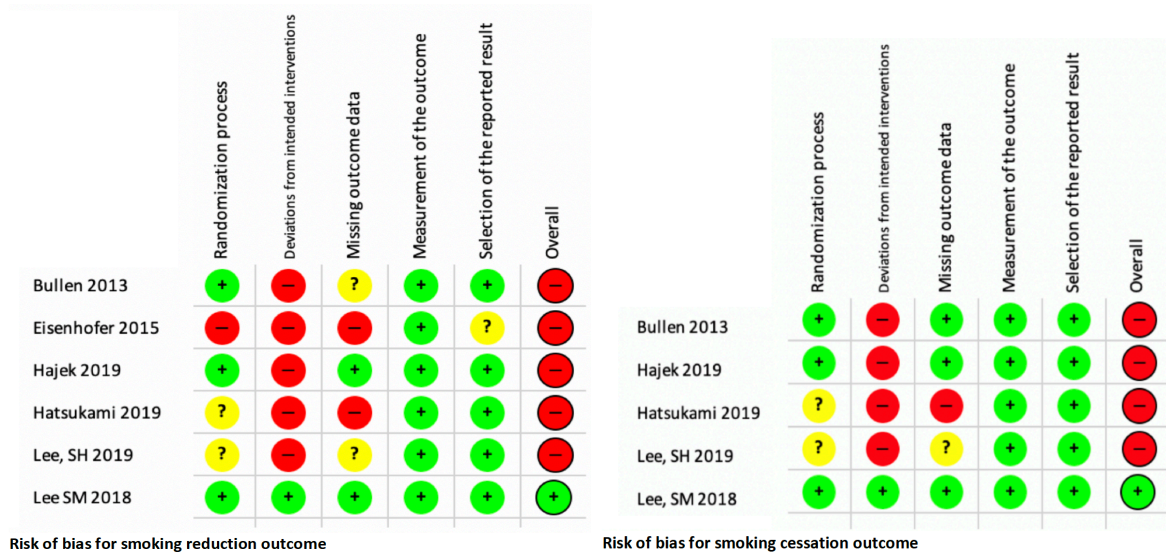

Risk of bias for smoking reduction outcome

Risk of bias for smoking cessation outcome

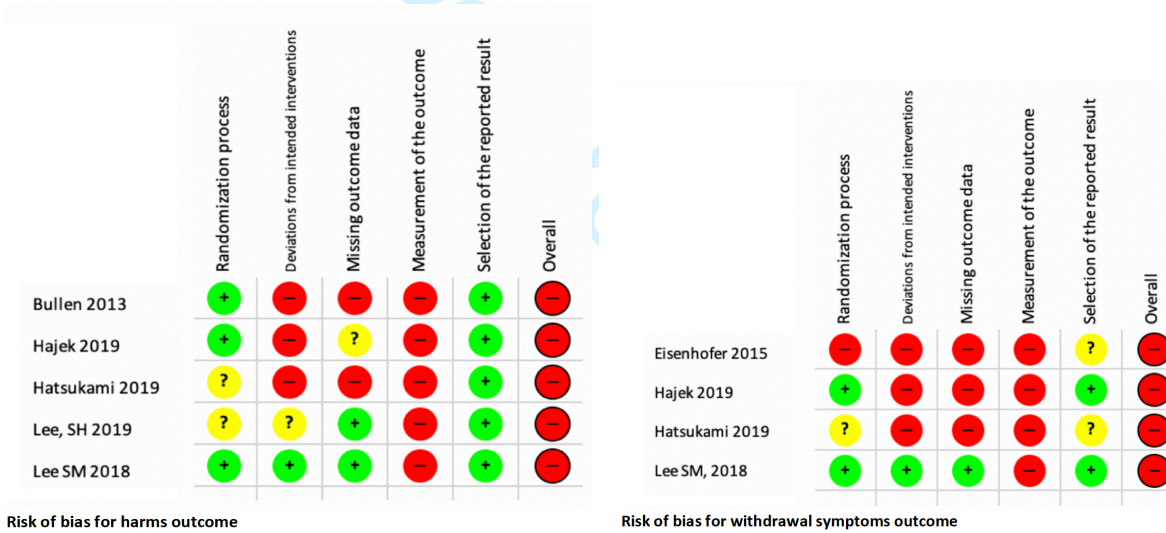

Risk of bias for harms outcome

Risk of bias for withdrawal symptoms outcome

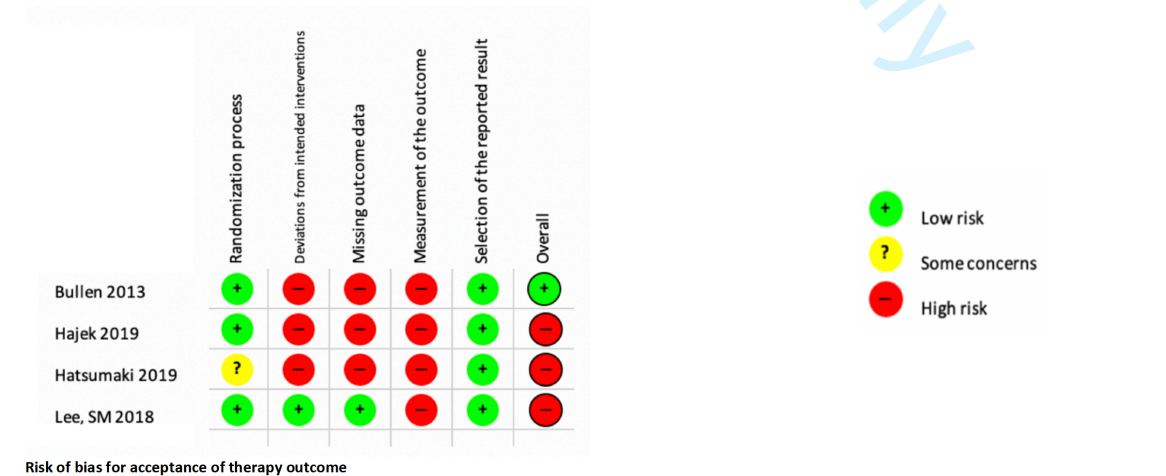

Risk of bias for acceptance of therapy outcome

Figure 2. Risk of bias for each outcome

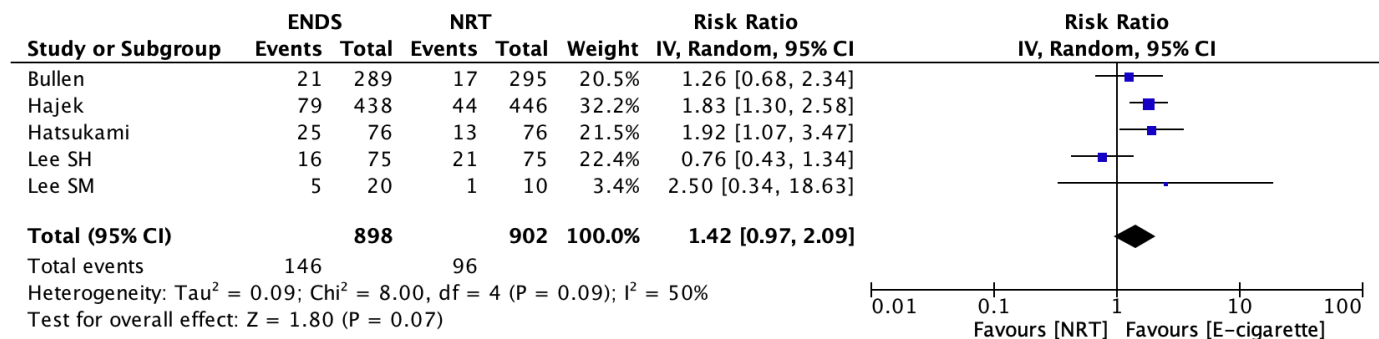

Smoking cessation outcome

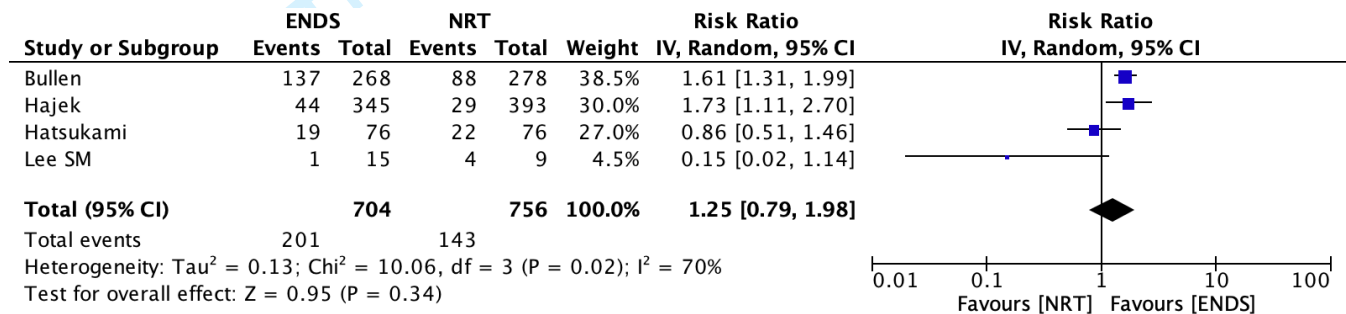

Proportion of participants successfully reducing smoking consumption by 50%

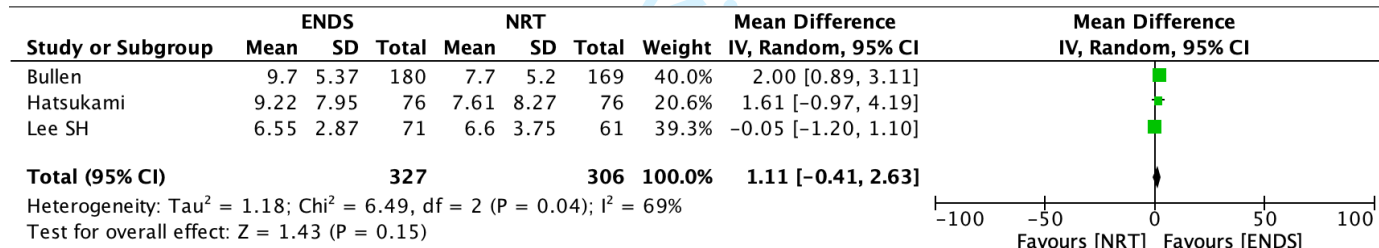

Mean reduction of cigarettes from baseline

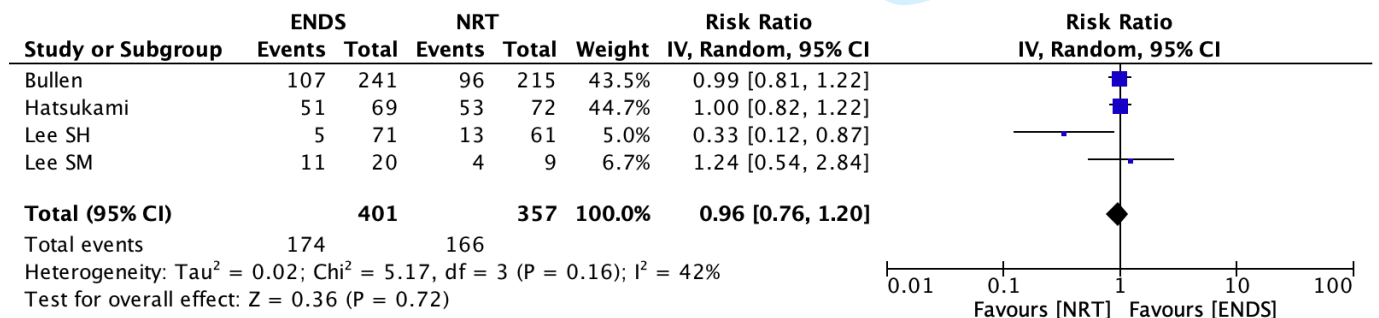

Proportion of participants experiencing adverse events

Figure 3. Pooled results per outcome

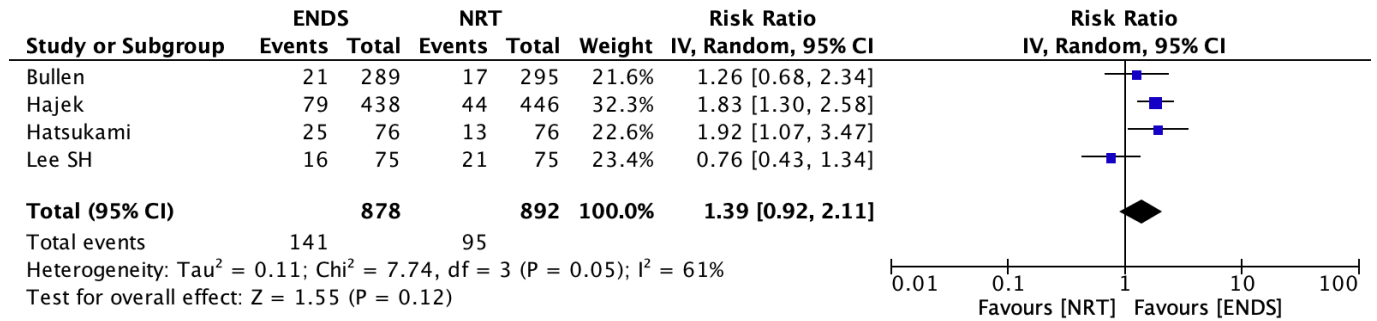

### Sensitivity Analysis—Smoking cessation, for studies examining smoking cessation in the general population

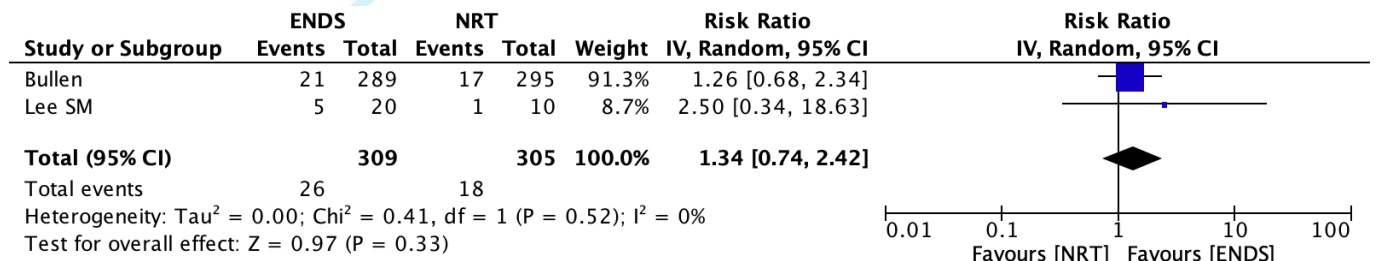

### Subgroup Analysis—Smoking cessation, comparing e-cigarettes to nicotine patches only

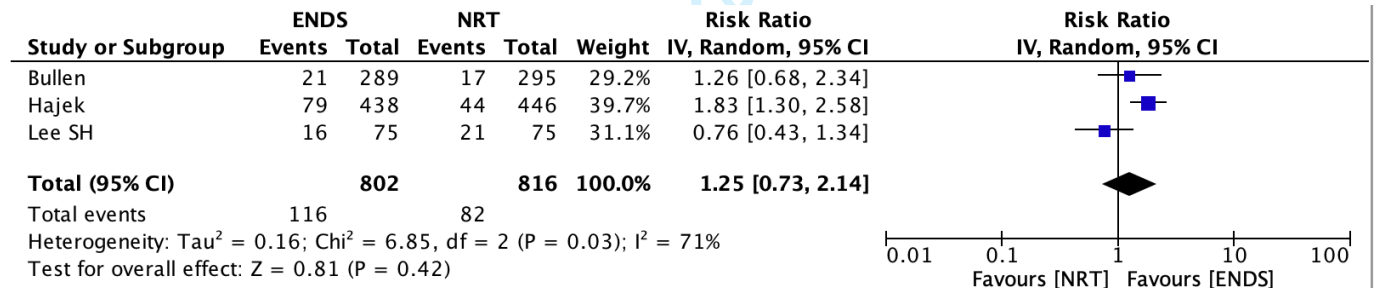

### Subgroup Analysis—Continuous/sustained abstinence, 6 months and greater only

Figure 4. Subgroup and Sensitivity Analyses



## Supplementary Material 1

### Search strategies

MEDLINE, Embase, CENTRAL

Note: Searches were conducted using an Ovid multi-database search and duplicate records were removed online giving preference to MEDLINE, then Embase, with no field preference. Lines 1-3 are optimized for MEDLINE and the main question constructs are broken out in separate lines for clarity. Lines 4-7 are optimized for Embase and lines 8-10 are optimized for CENTRAL. The next lines isolate the records to the database the search was designed for, combine those sets and then remove duplicate records and final isolate the records from each database again so each can be downloaded and imported into the citation manager using a database-specific import filter.

1. Electronic Nicotine Delivery Systems/ or (e cig\* or electr\* cigar\* or electronic nicotine).mp. or (vape or vaper or vapers or vaping or non-combustible nicotine-containing product).ti,ab,kf.
2. exp "Tobacco Use Cessation Devices"/ or NRT.ti,ab,kf. or (nicotine adj2 (patch\* or gum or nasal spray or mouth spray or mouth strips or lozenge\* or tablet\* or microtab\* or sublingual or replac\*)).mp. or (nicotine adj3 therapy).mp.
3. (1 and 2 and ((randomized controlled trial or controlled clinical trial).pt. or randomized.ab. or placebo.ab. or drug therapy.fs. or randomly.ab. or trial.ab. or groups.ab.)) not exp animals/ not humans.sh.
4. Electronic Cigarette/ or (e cig\* or electr\* cigar\* or electronic nicotine).mp. or (vape or vaper or vapers or vaping or non-combustible nicotine-containing product).ti,ab,kw.
5. Nicotine Replacement Therapy/ or NRT.ti,ab,kw. or (nicotine adj2 (patch\* or gum or nasal spray or mouth spray or mouth strips or lozenge\* or tablet\* or microtab\* or sublingual or replac\*)).mp. or (nicotine adj3 therapy).mp.
6. 4 and 5 and (Crossover-Procedure/ or Double-Blind Procedure/ or Randomized Controlled Trial/ or Single-Blind Procedure/ or (random\* or factorial\* or crossover\* or cross over\* or cross-over\* or placebo\* or (doubl\* adj blind\*) or (singl\* adj blind\*) or assign\* or allocat\* or volunteer\*).ti,ab,kw.)
7. limit 6 to embase
8. (e cig\* or electr\* cigar\* or electronic nicotine).mp. or (vape or vaper or vapers or vaping or non-combustible nicotine-containing product).ti,ab,kw.
9. NRT.ti,ab,kw. or (nicotine adj2 (patch\* or gum or nasal spray or mouth spray or mouth strips or lozenge\* or tablet\* or microtab\* or sublingual or replac\*)).mp. or (nicotine adj3 therapy).mp.
10. 8 and 9
11. 3 use medall
12. 7 use emczd
13. 10 use cctr
14. 11 or 12 or 13
15. remove duplicates from 14
16. 15 use medall
17. 15 use emczd
18. 15 use cctr

1  
2  
3  
4  
5  
6  
7 ClinicalTrials.gov

8 (electronic cigarette OR vape OR vaping OR electronic nicotine) AND (nicotine replacement OR  
9 NRT OR patch OR gum OR nasal spray OR mouth spray OR mouth strips OR lozenge OR tablet  
10 OR microtab OR microtablet OR sublingual) | Interventional Studies

11  
12 91 records retrieved  
13

14  
15 WHO ICTRP

16 electronic cigarette OR vape or vaping OR electronic nicotine

17 153 records retrieved with 20 remaining after records with a TrialID starting with NCT were  
18 removed prior to screening  
19

20  
21 Note: As the ICTRP registry has limited search capabilities<sup>35</sup>, only terms related to the  
22 intervention were used and protocols with a NCT number were removed from the retrieval, as  
23 those protocols would also be included in ClinicalTrials.gov.  
24  
25  
26  
27  
28  
29  
30  
31  
32  
33  
34  
35  
36  
37  
38  
39  
40  
41  
42  
43  
44  
45  
46  
47  
48  
49  
50  
51  
52  
53  
54  
55  
56  
57  
58  
59  
60

## Supplementary Material 2

### Abstracted data

The abstracted data included the following:

1- *study characteristics:*

author names, year of publication, ties with tobacco industry, funding of study, country of study, study setting, study design, number of participating sites, recruitment procedures, enrolment dates, length of study period, random sequence generation, allocation sequence concealment, blinding, methods for preventing and controlling confounding, selection bias, information bias and missing bias, unit of analysis, covariates inclusion, funding, financial and conflict of interest disclosure including ties with industry, inclusion and exclusion criteria, sample size, number of participants that were analyzed, number of participants lost to follow up for each outcome and for the whole study, number of participants at study onset and randomized to each group, and type of analysis (intention to treat vs per protocol)

2- *participant characteristics:*

age, gender, comorbidities, ethnicities, socio-economic status, income, education, cigarettes smoked per day, Fagerström test for cigarette dependence

3- *intervention characteristics:*

type, model, brand and generation of ENDS, type and flavor of e-liquid, nicotine content, intervention protocol, length of time ENDS were provided free of charge, frequency of use, duration of intervention, integrity of intervention, description of co-interventions

4- *comparator characteristics:*

type of nicotine replacement therapy used, dose, frequency of use, nicotine content, control protocol, frequency of use, length of time supplies were provided free of charge, combination of products, frequency of use duration of control, integrity of control, description of co-interventions

5- *outcomes:*

smoking cessation, method of assessment for smoking cessation used (self-report vs biochemical), smoking abstinence definition, longest time point of smoking cessation, harms assessment, methods of harms assessment, definition of harms, withdrawal symptoms, method of assessment for withdrawal symptoms, reduction in cigarettes smoked, method of assessment of reduction in cigarettes smoked, number of quit attempts, method of quit attempt measurement, acceptance of ENDS/NRT, method of acceptance assessment, method of aggregation used for each outcome, timing of measurement for each outcome, summary data for each outcome, method of aggregation used for each outcome.

**Supplementary Material 3**  
**Detailed description of the included studies**

**Supplementary Table 1a. Characteristics of randomized controlled trials measuring smoking cessation at 6 months or later**

| <b>Bullen, 2013</b>  |                                                                                                                                                                                                                                                                                                                                                                                                                                                                                                                                                                                                                                                                                                                                                                                                                                                                                                                                                          |
|----------------------|----------------------------------------------------------------------------------------------------------------------------------------------------------------------------------------------------------------------------------------------------------------------------------------------------------------------------------------------------------------------------------------------------------------------------------------------------------------------------------------------------------------------------------------------------------------------------------------------------------------------------------------------------------------------------------------------------------------------------------------------------------------------------------------------------------------------------------------------------------------------------------------------------------------------------------------------------------|
| <b>Methods</b>       | <p><b>Design:</b> 3 parallel groups RCT</p> <p><b>Recruitment:</b> Participants were recruited via community newspapers, inviting people to call the study centre for eligibility pre-screening</p> <p><b>Setting:</b> one single center in Auckland Australia</p> <p><b>Inclusion criteria:</b> 18 years of age or older, smoked 10 or more cigarettes per day for the past year, and wanted to quit smoking.</p> <p><b>Exclusion criteria:</b> Pregnant or breastfeeding women, people using smoking cessation drugs, those reporting heart attack, stroke, severe angina in the previous 2 weeks, and people with poorly controlled medical disorders allergies, or other chemical dependence were excluded</p>                                                                                                                                                                                                                                       |
| <b>Participants</b>  | <p><b>Total N:</b> 657 smokers were included in this study, but we only extracted 584 participants for our review (2 of the 3 groups) as the e-cigarette placebo group did not fit our eligibility criteria.</p> <p>Most participants were women (62%), of a mean age &gt; 40. Approximately one third were of Maori descent, and a little over half had completed grade 12 or above education level. The average daily number of cigarettes smoked at study onset was around 18, and mean Fagerström test result (0 to 10 scale) for cigarette dependence was &gt; 5.</p>                                                                                                                                                                                                                                                                                                                                                                               |
| <b>Interventions</b> | <p><b>Randomization:</b> 4:4:1 ratio to nicotine e-cigarettes, nicotine patches and placebo e-cigarette group</p> <p><b>Nicotine e-cigarette group</b><br/>Participants were couriered a first-generation e-cigarette, spare battery and charger, as well as cartridges containing 10 to 16mg of nicotine per mL (although labelled to contain 16 mg), plus simple instructions to use the e-cigarettes as desired from 1 week before until 12 weeks after their chosen quit day. Participants received on average around 20% of the nicotine obtained from cigarette smoking.</p> <p><b>Nicotine patch group</b><br/>Participants were sent exchange cards in the mail redeemable for nicotine patches 21 mg from community pharmacies, with instructions to use the patches daily, from 1 week before until 12 weeks after their chosen quit day. Vouchers were also supplied to participants to cover dispensing costs.</p> <p><b>Both groups</b></p> |

|                      |                                                                                                                                                                                                                                                                                                                                                                                                                                                                                                                                                                                                                                                                                                                                                                                                                                        |
|----------------------|----------------------------------------------------------------------------------------------------------------------------------------------------------------------------------------------------------------------------------------------------------------------------------------------------------------------------------------------------------------------------------------------------------------------------------------------------------------------------------------------------------------------------------------------------------------------------------------------------------------------------------------------------------------------------------------------------------------------------------------------------------------------------------------------------------------------------------------|
|                      | Participants in all groups were also referred to telephone-based behavioural support                                                                                                                                                                                                                                                                                                                                                                                                                                                                                                                                                                                                                                                                                                                                                   |
| <b>Outcomes</b>      | Continuous abstinence at 6 months after quit day, defined as self-reported abstinence over the whole follow-up period allowing for 5 or less cigarettes in total, was self-reported, and verified with exhaled breath carbon monoxide of <10 ppm. Harms were both clinically assessed and self-reported, throughout the study period. Withdrawal symptoms were assessed at 1, 3, and 6 months. Reduction in daily cigarettes smoked was measured at 6 months, and acceptance of therapy was measured at 1 and 6 months.                                                                                                                                                                                                                                                                                                                |
| <b>Notes</b>         | Some of this study's authors reported ties to e-cigarette manufacturers, and smoking cessation drug companies                                                                                                                                                                                                                                                                                                                                                                                                                                                                                                                                                                                                                                                                                                                          |
| <b>Hajek, 2019</b>   |                                                                                                                                                                                                                                                                                                                                                                                                                                                                                                                                                                                                                                                                                                                                                                                                                                        |
| <b>Methods</b>       | <p><b>Design:</b> 2 parallel groups RCT</p> <p><b>Recruitment:</b> Participants were recruited through stop smoking services, which included trial information in their advertising. Participants were also recruited through social media, and leaflets advertising the trial were delivered to local households.</p> <p><b>Setting:</b> 3 sites in the United Kingdom</p> <p><b>Inclusion criteria:</b> Adults, with no strong preference towards e-cigarette or NRT, who were not using either type of product at the time of study enrolment</p> <p><b>Exclusion criteria:</b> Pregnant women or breastfeeding women</p>                                                                                                                                                                                                           |
| <b>Participants</b>  | <p><b>Total N:</b> 884 participants were included in this study</p> <p>Median age for both groups was 41, and women comprised 48% of participants. Most participants were White British, and the majority had post-secondary education. Median daily number of cigarettes smoked at study onset was 15, and mean Fagerström test result for cigarette dependence was 4.5 in the e-cigarette group and 4.6 in the NRT group.</p>                                                                                                                                                                                                                                                                                                                                                                                                        |
| <b>Interventions</b> | <p><b>Randomization:</b> nicotine-containing e-cigarettes of varying doses, and any choice of a list of NRT, in a 1:1 ratio</p> <p><b>E-cigarette group</b></p> <p>Participants were provided with a starter pack called One Kit, which included an atomizer, a battery, and one 30 mL bottle of Tobacco Royale flavor e-liquid. Participants were asked to purchase their future e-liquid online or from local vape shops and to buy a different e-cigarette device if the one supplied did not meet their needs. They were encouraged to experiment with e-liquids of different strengths and flavors. Those who were unable to obtain their own supply were provided with one further 10-ml bottle, but this was not offered proactively. Participants received oral and written information on how to operate the e-cigarette.</p> |

|                      |                                                                                                                                                                                                                                                                                                                                                                                                                                                                                                                                                                                                                                                                                                   |
|----------------------|---------------------------------------------------------------------------------------------------------------------------------------------------------------------------------------------------------------------------------------------------------------------------------------------------------------------------------------------------------------------------------------------------------------------------------------------------------------------------------------------------------------------------------------------------------------------------------------------------------------------------------------------------------------------------------------------------|
|                      | <p><b>NRT group</b><br/>Participants were informed about the range of nicotine-replacement products (patch, gum, lozenge, nasal spray, inhalator, mouth spray, mouth strip, and microtabs) and selected their preferred product. Use of combinations was encouraged, typically the patch and a faster-acting oral product. Participants were also free to switch products.ps</p> <p><b>Both groups</b><br/>Participants in both groups were offered multisession behavioral support as per UK stop smoking service practice, involving weekly one on one session with local clinicians.<br/>Participants were also asked to sign a commitment to not use the unassigned treatment for 4 weeks</p> |
| <b>Outcomes</b>      | Continuous abstinence at 52 weeks after quit day, defined as self-reported abstinence over the whole follow-up period allowing for 5 or less cigarettes in total, was self-reported, and verified with exhaled breath carbon monoxide of <8 ppm. Harms were self-reported throughout the study period. Withdrawal symptoms were assessed at 1 and 4 weeks in abstainers. Reduction in daily cigarettes smoked was also measured at 52 weeks, as well as acceptance of e-cigarettes and NRT                                                                                                                                                                                                        |
| <b>Notes</b>         | Some of this study's authors reported ties to smoking cessation drug companies.                                                                                                                                                                                                                                                                                                                                                                                                                                                                                                                                                                                                                   |
| <b>Lee SH, 2019</b>  |                                                                                                                                                                                                                                                                                                                                                                                                                                                                                                                                                                                                                                                                                                   |
| <b>Methods</b>       | <p><b>Design:</b> 2 parallel groups RCT</p> <p><b>Recruitment:</b> Participants were recruited from a motor company in the Republic of Korea.</p> <p><b>Setting:</b> One site in Cheonan, Republic of Korea</p> <p><b>Inclusion criteria:</b> Participants were adults 18 years and above, male, who smoked at least 10 cigarettes per day in the preceding year, and who were motivated to stop smoking entirely or to reduce their cigarette consumption</p> <p><b>Exclusion criteria:</b> Participants were excluded if they had a past medical history of serious clinical diseases or had attempted to stop smoking in the last 12 months by using other NRT.</p>                            |
| <b>Participants</b>  | <p><b>Total N:</b> 150 participants were included in the study</p> <p>Mean age was 42 years and all participants were men. Almost 40% had post-secondary education. Median daily number of cigarettes smoked at study onset was 1 pack per day, and mean Fagerström test result for cigarette dependence was 4.</p>                                                                                                                                                                                                                                                                                                                                                                               |
| <b>Interventions</b> | <p><b>Randomization:</b> nicotine-containing e-cigarettes, and nicotine gum in a 1:1 ratio</p> <p><b>E-cigarette group</b></p>                                                                                                                                                                                                                                                                                                                                                                                                                                                                                                                                                                    |

|                      |                                                                                                                                                                                                                                                                                                                                                                                                                                                                                                                                                                                                                                                                                                                                                                                                                                                                                                                                    |
|----------------------|------------------------------------------------------------------------------------------------------------------------------------------------------------------------------------------------------------------------------------------------------------------------------------------------------------------------------------------------------------------------------------------------------------------------------------------------------------------------------------------------------------------------------------------------------------------------------------------------------------------------------------------------------------------------------------------------------------------------------------------------------------------------------------------------------------------------------------------------------------------------------------------------------------------------------------|
|                      | <p>Participants received a 24-week supply of e-cigarettes eGo-C Ovale, Janty-Korea Co., Janty-Asia Co., Seoul, Republic of Korea, nicotine 0.01 mg/mL.</p> <p><b>Nicotine gum group</b><br/>Participants received a 24-week supply of nicotine gum Nicoman, Daewoog Pharmaceutical, Seongnam, Republic of Korea, 2 mg/tablet</p> <p><b>Both groups</b><br/>Participants in both groups were offered 55-minute education sessions on smoking cessation aids</p>                                                                                                                                                                                                                                                                                                                                                                                                                                                                     |
| <b>Outcomes</b>      | Continuous abstinence was defined as abstinence from smoking from 9 to 24 weeks, validated with end-expiratory carbon monoxide (<10 ppm) and a negative urine cotinine result. Harms were self-reported throughout the study period. Reduction in daily cigarettes smoked was also measured at 24 weeks.                                                                                                                                                                                                                                                                                                                                                                                                                                                                                                                                                                                                                           |
| <b>Notes</b>         | None of the study authors were found to have ties to industry.                                                                                                                                                                                                                                                                                                                                                                                                                                                                                                                                                                                                                                                                                                                                                                                                                                                                     |
| <b>Lee SM, 2018</b>  |                                                                                                                                                                                                                                                                                                                                                                                                                                                                                                                                                                                                                                                                                                                                                                                                                                                                                                                                    |
| <b>Methods</b>       | <p><b>Design:</b> 2 parallel groups RCT</p> <p><b>Recruitment:</b> Participants were recruited from an anesthesia preoperative clinic for elective surgery.</p> <p><b>Setting:</b> San Francisco Veterans' Affairs Medical Center, affiliated with the University of California in San Francisco United States of America</p> <p><b>Inclusion criteria:</b> Participants were eligible if they presented to the clinic 3 or more days prior to elective surgery, smoked more than two cigarettes per day, and had smoked at least once in the last 7 days</p> <p><b>Exclusion criteria:</b> Participants were excluded if they exclusively used other forms of tobacco (e.g. pipe tobacco) or marijuana only, were pregnant or breastfeeding, had an unstable condition, were using smoking cessation therapy at the time of study enrolment or were in another smoking cessation trial, or currently used e-cigarettes daily.</p> |
| <b>Participants</b>  | <p><b>Total N:</b> 30 participants were included in this study</p> <p>Most participants were men (90%) in their 50's. Some had comorbidities including diabetes, hypertension, heart disease, and chronic obstructive pulmonary disease. Most were Caucasians. The average daily number of cigarettes smoked at study onset was 15.3 in the e-cigarette group, and 10.8 in the NRT group, and the mean Fagerström test result for cigarette dependence was 3.7 in the e-cigarette group and 2.5 in the NRT group.</p>                                                                                                                                                                                                                                                                                                                                                                                                              |
| <b>Interventions</b> | <p><b>Randomization:</b> e-cigarettes and nicotine patches in a 2:1 ratio</p> <p><b>E-cigarette group</b><br/>Participants received a 6-week supply of NJOY e-cigarettes (Scottsdale, AZ, USA), a disposable first-generation e-cigarette that is available in shops and online. They were issued a number of e-cigarettes corresponding to</p>                                                                                                                                                                                                                                                                                                                                                                                                                                                                                                                                                                                    |

|                 |                                                                                                                                                                                                                                                                                                                                                                                                                                                                                                                                                                                                                                                                                                                                                                                                                                                                                                                                                                                                                                                                                                                                                                                            |
|-----------------|--------------------------------------------------------------------------------------------------------------------------------------------------------------------------------------------------------------------------------------------------------------------------------------------------------------------------------------------------------------------------------------------------------------------------------------------------------------------------------------------------------------------------------------------------------------------------------------------------------------------------------------------------------------------------------------------------------------------------------------------------------------------------------------------------------------------------------------------------------------------------------------------------------------------------------------------------------------------------------------------------------------------------------------------------------------------------------------------------------------------------------------------------------------------------------------------|
|                 | <p>the reported baseline cigarettes smoked per day, calculated assuming one NJOY e-cigarette was equivalent to 10 cigarettes. Participants were instructed to smoke bold (4.5%) e-cigarettes ad libitum for 3 weeks, then the Gold (2.4%) e-cigarettes ad libitum for 2 weeks, and then the Study (0%) e-cigarettes ad libitum for the final week.</p> <p><b>Nicotine patch group</b><br/>Participants randomized to the nicotine patches group were given a 6-week supply of Nicoderm CQ patches (5 weeks) and placebo patches (1 week) appropriate to baseline nicotine consumption. Those smoking an average of ten or more cigarettes per day were given a 21 mg/day patch for 3 weeks, a 14 mg/day patch for 1 week, a 7 mg/day patch for 1 week, and a 0 mg/day patch for 1 week. Participants who reported smoking an average of fewer than 10 cigarettes per day at baseline were given a 14 mg/day patch for 3 weeks, a 7 mg/day patch for 2 weeks, and a 0 mg/day patch for 1 week.</p> <p><b>Both groups</b><br/>Participants in both groups were given referral California Smokers' Helpline and were asked to refrain from the use of cigarettes during the study period.</p> |
| <b>Outcomes</b> | Smoking cessation at 6 months was self-reported through 7-day point-prevalence abstinence and verified with exhaled breath carbon monoxide of <10 ppm. Harms and withdrawal symptoms were systematically collected at 8 weeks. Reduction in daily cigarettes smoked was also measured at 6 months, as well as acceptance of e-cigarettes and NRT.                                                                                                                                                                                                                                                                                                                                                                                                                                                                                                                                                                                                                                                                                                                                                                                                                                          |
| <b>Notes</b>    | None of the study authors were found to have ties to industry.                                                                                                                                                                                                                                                                                                                                                                                                                                                                                                                                                                                                                                                                                                                                                                                                                                                                                                                                                                                                                                                                                                                             |

**Supplementary Table 1b. Characteristics of randomized controlled trial measuring smoking cessation earlier than 6 months**

|                        |                                                                                                                                                                                                                                                                                                                                                                                                                                                                                                                                                                                   |
|------------------------|-----------------------------------------------------------------------------------------------------------------------------------------------------------------------------------------------------------------------------------------------------------------------------------------------------------------------------------------------------------------------------------------------------------------------------------------------------------------------------------------------------------------------------------------------------------------------------------|
| <b>Hatsukami, 2019</b> |                                                                                                                                                                                                                                                                                                                                                                                                                                                                                                                                                                                   |
| <b>Methods</b>         | <p><b>Design:</b> 4 parallel groups RCT</p> <p><b>Recruitment:</b> Participants were culled from two sets of studies, one of which also included two groups randomized to snus (spitless smokeless tobacco); one was complete substitution with snus, and the other was ad libitum use. Due to recruitment challenges, the two snus groups were dropped midway through the study, resulting in four experimental groups: ad libitum use of e-cigarettes (participants may smoke as many cigarettes as they like), complete substitution with e-cigarettes (aiming for smoking</p> |



|                      |                                                                                                                                                                                                                                                                                                                                                                                                                                                                                                                                                                                                                                                                                                                                                                                                                                                                                                                                                                                                                                                                                                                                                                                                                                                                                                               |
|----------------------|---------------------------------------------------------------------------------------------------------------------------------------------------------------------------------------------------------------------------------------------------------------------------------------------------------------------------------------------------------------------------------------------------------------------------------------------------------------------------------------------------------------------------------------------------------------------------------------------------------------------------------------------------------------------------------------------------------------------------------------------------------------------------------------------------------------------------------------------------------------------------------------------------------------------------------------------------------------------------------------------------------------------------------------------------------------------------------------------------------------------------------------------------------------------------------------------------------------------------------------------------------------------------------------------------------------|
|                      | <p>cessation), complete substitution with NRT, continued smoking with usual brand of cigarettes.</p> <p>Participants were recruited through various media outlets across three institutions. The advertisements stated that a study was recruiting smokers who were interested in trying a product that may reduce exposure to harmful tobacco smoke.</p> <p><b>Settings:</b> 3 sites, University of Minnesota, Twin Cities (lead site); The Ohio State University, Columbus, OH; Roswell Park Cancer Center, Buffalo, NY United States of America</p> <p><b>Inclusion criteria:</b> Participants were adults at least 18 years of age, smoked at least 5 cigarettes per day with a breath carbon monoxide test of at least 10 ppm or a NicAlert test = level 6, and in stable physical and mental health.</p> <p><b>Exclusion criteria:</b> Participants were excluded if they had a serious quit attempt in the past 3 months, recent (&lt;3 months) alcohol or drug abuse problems, regular use of other nicotine or tobacco products, were planning to quit smoking in the next 3 months, suffered from chronic conditions affecting results of biomarker analyses, were currently using NRT or other cessation medication, or if they were pregnant or planning to become pregnant, or breastfeeding</p> |
| <b>Participants</b>  | <p><b>Total N:</b> 264 participants were included in the study, but data for this review were only extracted from the complete substitution with e-cigarette group, and complete substitution with NRT group (152 participants), as the other two groups did not fit our eligibility criteria. Median age was 47 years, and women comprised 49% of participants. Most participants were White, and the majority had post-secondary education. The median daily number of cigarettes smoked at study onset was 15, and median Fagerström test result for cigarette dependence was 3.</p>                                                                                                                                                                                                                                                                                                                                                                                                                                                                                                                                                                                                                                                                                                                       |
| <b>Interventions</b> | <p><b>Randomization:</b> e-cigarettes and nicotine gum or lozenges</p> <p><b>E-cigarette group</b><br/>Participants randomized to this group used Vuse Solo, manufactured by RJ Reynolds Inc as the primary e-cigarette. Early in the study, Blu e-cigarettes (cartridge-based system) and Fin (prefilled tanks system) were used, but Vuse attained the highest market share early on so the study switched exclusively to Vuse. E-cigarettes with a 4.8% nicotine concentration were provided to participants free of charge for 8 weeks, as well as 7 cartridges weekly, with the option of returning to the clinic to obtain additional cartridges if needed. Tobacco, menthol, mint, and berry flavors were available.</p> <p><b>NRT group</b></p>                                                                                                                                                                                                                                                                                                                                                                                                                                                                                                                                                       |

|                 |                                                                                                                                                                                                                                                                                                                                                                                                                                                                                                                                                                                                                                                                                                                                                                                                                                                                 |
|-----------------|-----------------------------------------------------------------------------------------------------------------------------------------------------------------------------------------------------------------------------------------------------------------------------------------------------------------------------------------------------------------------------------------------------------------------------------------------------------------------------------------------------------------------------------------------------------------------------------------------------------------------------------------------------------------------------------------------------------------------------------------------------------------------------------------------------------------------------------------------------------------|
|                 | <p>Participants could choose between mint, cinnamon or fruit-flavored nicotine gum or nicotine lozenge, at a dose of 4 mg. If adverse effects were recorded, the dose was decreased to 2 mg.</p> <p><b>Both groups</b><br/>         After randomization, participants were asked to complete daily diaries via interactive voice recording to chart the number of cigarettes smoked daily, as well as document assigned product use for the duration of the trial. Participants received a monetary bonus if they complied with the protocol; this included keeping an accurate record of product use, completing the daily diaries, and returning unused products. They also got a bonus payment if they had a carbon monoxide level <math>\leq</math> 4 ppm at each visit. Participants also received a brief counseling session on how to avoid smoking.</p> |
| <b>Outcomes</b> | <p>Smoking cessation was determined by 7-day point prevalence at 8 weeks, mainly through biochemical verification but also by self-report. Reduction in daily cigarettes smoked was also measured at 8 weeks, as well as acceptance of e-cigarettes and NRT.</p> <p>Harms were assessed systematically at 20 weeks, 12 weeks after the end of the study period. Withdrawal symptoms were assessed at weeks 1, 2, 4, 6, and 8.</p>                                                                                                                                                                                                                                                                                                                                                                                                                               |
| <b>Notes</b>    | <p>One of the study authors is a member of the FDA Tobacco Products Scientific Advisory Committee and another one has served as an expert witness in tobacco company litigation.</p>                                                                                                                                                                                                                                                                                                                                                                                                                                                                                                                                                                                                                                                                            |

**Supplementary Table 1c. Characteristics of randomized controlled trial measuring other outcomes**

| <b>Eisenhofer, 2015</b> |                                                                                                                                                                                                                                                                                                              |
|-------------------------|--------------------------------------------------------------------------------------------------------------------------------------------------------------------------------------------------------------------------------------------------------------------------------------------------------------|
| <b>Methods</b>          | <p><b>Design:</b> 2 parallel groups RCT<br/> <b>Recruitment:</b> Not specified<br/> <b>Setting:</b> Not specified<br/> <b>Inclusion criteria:</b> Veterans who met criteria for tobacco disorder as per the DSM<br/> <b>Exclusion criteria:</b> Not specified</p>                                            |
| <b>Participants</b>     | <p><b>Total N:</b> 11 participants were included<br/>         Mean age was 52, and 82% were males. The vast majority of participants were African American. The average daily number of cigarettes smoked at study onset was 26.5, and the mean Fagerström test result for cigarette dependence was 7.5.</p> |
| <b>Intervention</b>     | <p><b>Randomization:</b> e-cigarettes and nicotine patches</p> <p><b>E-cigarette group</b></p>                                                                                                                                                                                                               |

|                 |                                                                                                                                                                                                                                                                                                                                     |
|-----------------|-------------------------------------------------------------------------------------------------------------------------------------------------------------------------------------------------------------------------------------------------------------------------------------------------------------------------------------|
|                 | <p>Participants received nicotine-containing e-cigarettes with 16 mg of nicotine per cartridge</p> <p><b>NRT group</b><br/>Participants received nicotine patch 16 mg daily</p> <p><b>Both groups</b><br/>All participants were instructed to smoke ad libitum during week 1, and to smoke as little as possible during week 3.</p> |
| <b>Outcomes</b> | Reduction in cigarettes smoked per day was self-reported at 3 weeks and compared to week 1. Withdrawal symptoms were compared between week 1 and week 3.                                                                                                                                                                            |
| <b>Notes</b>    | This study was available as an abstract only therefore limited details are available.                                                                                                                                                                                                                                               |

**Supplementary Material 4**  
**Details on Risk of Bias Assessment for each outcome of interest**

**Supplementary Table 2. Detailed description of concerns for each domain marked identified as “some concerns” or “high risk” on Risk of Bias Assessment**

| Smoking cessation outcome |                                                                                                                  |                                                                                                                                                                                                                                                                                                                                               |                                                                                                                          |                            |                                  |
|---------------------------|------------------------------------------------------------------------------------------------------------------|-----------------------------------------------------------------------------------------------------------------------------------------------------------------------------------------------------------------------------------------------------------------------------------------------------------------------------------------------|--------------------------------------------------------------------------------------------------------------------------|----------------------------|----------------------------------|
|                           | Randomization Process                                                                                            | Deviations from intended intervention                                                                                                                                                                                                                                                                                                         | Missing of outcome data                                                                                                  | Measurement of the outcome | Selection of the reported result |
| <b>Bullen 2013</b>        | Low risk                                                                                                         | Adherence higher in the ENDS group compared to NRT group at all timepoints. At 6 months, 29% of ENDS group vs 8% of NRT group still using assigned treatment.                                                                                                                                                                                 | Low risk                                                                                                                 | Low risk                   | Low risk                         |
| <b>Hajek 2019</b>         | Low risk                                                                                                         | At 52 weeks among participants with 1-year abstinence, 80% were using e-cigarettes in the ENDS group vs 9% in the NRT group. Also, 6% of participants in the ENDS group reported using non-allocated NRT for at least five consecutive days in the past six months compared to 22% in the NRT group that reported using non-allocated product | Low risk                                                                                                                 | Low risk                   | Low risk                         |
| <b>Hatsukami 2019</b>     | No information provided with regards to randomization process and allocation concealment. However, there were no | The NRT group had the highest dropout rates compared to the other groups in the study. At 8 weeks, 24% dropped out in the ENDS group compared to 30% in the NRT group.                                                                                                                                                                        | Large number of dropouts; participants who did not stop smoking could be less motivated to continue with study follow up | Low risk                   | Low risk                         |

|                                  |                                                                                         |                                                                                                                                                     |                                                                                                                                                                                                                                         |          |                                              |
|----------------------------------|-----------------------------------------------------------------------------------------|-----------------------------------------------------------------------------------------------------------------------------------------------------|-----------------------------------------------------------------------------------------------------------------------------------------------------------------------------------------------------------------------------------------|----------|----------------------------------------------|
|                                  | significant baseline differences between groups                                         |                                                                                                                                                     |                                                                                                                                                                                                                                         |          |                                              |
| <b>Lee, SH 2019</b>              | The use of constant block sizes of 2 makes it easy to determine order of randomization. | No participants discontinued the intervention. However, 4 and 14 participants in the ENDS and NRT group dropped out before treatment, respectively. | Although data was missing for 12% of randomized individuals, all dropouts occurred prior to the start of treatment. Missingness in this case less likely to be due to the value of the outcome as it happened prior to onset of therapy | Low risk | Low risk                                     |
| <b>Lee, SM 2018</b>              | Low risk                                                                                | Low risk                                                                                                                                            | Low risk                                                                                                                                                                                                                                | Low risk | Low risk                                     |
| <b>Smoking reduction outcome</b> |                                                                                         |                                                                                                                                                     |                                                                                                                                                                                                                                         |          |                                              |
| <b>Bullen 2013</b>               | Low risk                                                                                | Refer to smoking cessation outcome                                                                                                                  | Sensitivity analyses conducted for the smoking cessation outcome were not performed for the smoking reduction outcome                                                                                                                   | Low risk | Low risk                                     |
| <b>Eisenhofer 2015</b>           | Not enough information available in abstract                                            | Not enough information available in abstract                                                                                                        | Not enough information available in abstract                                                                                                                                                                                            | Low risk | Not enough information available in abstract |
| <b>Hajek 2019</b>                | Low risk                                                                                | Refer to smoking cessation outcome                                                                                                                  | Low risk                                                                                                                                                                                                                                | Low risk | Low risk                                     |
| <b>Hatsukami 2019</b>            | Refer to smoking cessation outcome                                                      | Refer to smoking cessation outcome                                                                                                                  | Refer to smoking cessation outcome                                                                                                                                                                                                      | Low risk | Low risk                                     |
| <b>Lee, SH 2019</b>              | Refer to smoking cessation outcome                                                      | Refer to smoking cessation outcome                                                                                                                  | Refer to smoking cessation outcome                                                                                                                                                                                                      | Low risk | Low risk                                     |
| <b>Lee, SM 2018</b>              | Low risk                                                                                | Low risk                                                                                                                                            | Low risk                                                                                                                                                                                                                                | Low risk | Low risk                                     |
| <b>Harms outcome</b>             |                                                                                         |                                                                                                                                                     |                                                                                                                                                                                                                                         |          |                                              |

|                       |                                    |                                                                                                                                                                                                  |                                                                                                                                                                                                                   |                                                                                                                                                  |          |
|-----------------------|------------------------------------|--------------------------------------------------------------------------------------------------------------------------------------------------------------------------------------------------|-------------------------------------------------------------------------------------------------------------------------------------------------------------------------------------------------------------------|--------------------------------------------------------------------------------------------------------------------------------------------------|----------|
| <b>Bullen 2013</b>    | Low risk                           | Differences in treatment adherence could potentially lead to discrepancies in harm reporting                                                                                                     | No information on the proportion of participants on whom adverse events were collected; it is likely that people who experienced more severe side effects did not continue with study follow-up activities        | high likelihood that participants who were unhappy with their treatment allocation would report side effects more often than their counterparts. | Low risk |
| <b>Hajek 2019</b>     | Low risk                           | Differences in treatment adherence could potentially lead to discrepancies in harm reporting                                                                                                     | The authors reported harm data based on number of participants at randomization, however significant dropout seen at 4-week follow up, raising concerns that adverse event data not collected on all participants | High likelihood that participants who were unhappy with their treatment allocation would report side effects more often than their counterparts  | Low risk |
| <b>Hatsukami 2019</b> | Refer to smoking cessation outcome | Differences in treatment adherence could potentially lead to discrepancies in harm reporting                                                                                                     | No information on the proportion of participants on whom adverse events were collected; it is likely that people who experienced more severe side effects did not continue with study follow-up activities        | High likelihood that participants who were unhappy with their treatment allocation would report side effects more often than their counterparts  | Low risk |
| <b>Lee, SH 2019</b>   | Refer to smoking cessation outcome | Differences in treatment adherence could potentially lead to discrepancies in harm reporting however non-adherence happened prior to onset of treatment, therefore less likely to have an impact | Low risk                                                                                                                                                                                                          | High likelihood that participants who were unhappy with their treatment allocation would report side effects more often than their counterparts  | Low risk |
| <b>Lee, SM 2018</b>   | Low risk                           | Low risk                                                                                                                                                                                         | Low risk                                                                                                                                                                                                          | High likelihood that participants who were unhappy with their                                                                                    | Low risk |

|                                    |                                              |                                                                                                             |                                                                                                                                                                              |                                                                                                                                                                                                              |                                                                   |
|------------------------------------|----------------------------------------------|-------------------------------------------------------------------------------------------------------------|------------------------------------------------------------------------------------------------------------------------------------------------------------------------------|--------------------------------------------------------------------------------------------------------------------------------------------------------------------------------------------------------------|-------------------------------------------------------------------|
|                                    |                                              |                                                                                                             |                                                                                                                                                                              | treatment allocation would report side effects more often than their counterparts                                                                                                                            |                                                                   |
| <b>Withdrawal symptoms outcome</b> |                                              |                                                                                                             |                                                                                                                                                                              |                                                                                                                                                                                                              |                                                                   |
| <b>Eisenhofer 2015</b>             | Not enough information available in abstract | Not enough information available in abstract                                                                | Not enough information available in abstract                                                                                                                                 | Not enough information available in abstract                                                                                                                                                                 | Not enough information available in abstract                      |
| <b>Hajek 2019</b>                  | Low risk                                     | Differences in treatment adherence could potentially lead to discrepancies in withdrawal symptoms reporting | Outcome not available for all randomized participants; likely that people who experienced more nicotine withdrawal symptoms did not continue with study follow-up activities | Given that the withdrawal measurements were self-reported, there is a high likelihood that participants who were unhappy with treatment allocation reported more withdrawal symptoms than their counterparts | Low risk                                                          |
| <b>Hatsukami 2019</b>              | Refer to smoking cessation outcome           | Differences in treatment adherence could potentially lead to discrepancies in withdrawal symptoms reporting | Outcome not available for all randomized participants; likely that people who experienced more nicotine withdrawal symptoms did not continue with study follow-up activities | Given that the withdrawal measurements were self-reported, there is a high likelihood that participants who were unhappy with treatment allocation reported more withdrawal symptoms than their counterparts | No information on how withdrawal symptom assessment was performed |
| <b>Lee, SM 2018</b>                | Low risk                                     | Low risk                                                                                                    | Low risk                                                                                                                                                                     | Given that the withdrawal measurements were self-reported, there is a high likelihood that participants who were                                                                                             | Low risk                                                          |

1  
2  
3  
4  
5  
6  
7  
8  
9  
10  
11  
12  
13  
14  
15  
16  
17  
18  
19  
20  
21  
22  
23  
24  
25  
26  
27  
28  
29  
30  
31  
32  
33  
34  
35  
36  
37  
38  
39  
40  
41  
42  
43  
44  
45  
46  
47

|                                      |                                              |                                                                                                             |                                                                                                          |                                                                                             |          |
|--------------------------------------|----------------------------------------------|-------------------------------------------------------------------------------------------------------------|----------------------------------------------------------------------------------------------------------|---------------------------------------------------------------------------------------------|----------|
|                                      |                                              |                                                                                                             |                                                                                                          | unhappy with treatment allocation reported more withdrawal symptoms than their counterparts |          |
| <b>Acceptance of therapy outcome</b> |                                              |                                                                                                             |                                                                                                          |                                                                                             |          |
| <b>Bullen 2013</b>                   | Low risk                                     | Differences in treatment adherence could potentially lead to discrepancies in acceptance of therapy outcome | Participants unhappy with their assigned therapy likely did not continue with study follow-up activities | Highly subjective outcome, inability to blind participants to assigned therapy              | Low risk |
| <b>Hajek 2019</b>                    | Low risk                                     | Differences in treatment adherence could potentially lead to discrepancies in acceptance of therapy outcome | Participants unhappy with their assigned therapy likely did not continue with study follow-up activities | Highly subjective outcome, inability to blind participants to assigned therapy              | Low risk |
| <b>Hatsukami 2019</b>                | Not enough information available in abstract | Differences in treatment adherence could potentially lead to discrepancies in acceptance of therapy outcome | Participants unhappy with their assigned therapy likely did not continue with study follow-up activities | Highly subjective outcome, inability to blind participants to assigned therapy              | Low risk |
| <b>Lee, SM 2018</b>                  | Low risk                                     | Low risk                                                                                                    | Low risk                                                                                                 | Highly subjective outcome, inability to blind participants to assigned therapy              | Low risk |



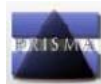

# PRISMA 2009 Checklist

1  
2  
3  
4  
5  
6  
7  
8  
9  
10  
11  
12  
13  
14  
15  
16  
17  
18  
19  
20  
21  
22  
23  
24  
25  
26  
27  
28  
29  
30  
31  
32  
33  
34  
35  
36  
37  
38  
39  
40  
41  
42  
43  
44  
45  
46  
47

| Section/topic                      | #  | Checklist item                                                                                                                                                                                                                                                                                              | Reported on page #   |
|------------------------------------|----|-------------------------------------------------------------------------------------------------------------------------------------------------------------------------------------------------------------------------------------------------------------------------------------------------------------|----------------------|
| <b>TITLE</b>                       |    |                                                                                                                                                                                                                                                                                                             |                      |
| Title                              | 1  | Identify the report as a systematic review, meta-analysis, or both.                                                                                                                                                                                                                                         | 0                    |
| <b>ABSTRACT</b>                    |    |                                                                                                                                                                                                                                                                                                             |                      |
| Structured summary                 | 2  | Provide a structured summary including, as applicable: background; objectives; data sources; study eligibility criteria, participants, and interventions; study appraisal and synthesis methods; results; limitations; conclusions and implications of key findings; systematic review registration number. | 1                    |
| <b>INTRODUCTION</b>                |    |                                                                                                                                                                                                                                                                                                             |                      |
| Rationale                          | 3  | Describe the rationale for the review in the context of what is already known.                                                                                                                                                                                                                              | 4                    |
| Objectives                         | 4  | Provide an explicit statement of questions being addressed with reference to participants, interventions, comparisons, outcomes, and study design (PICOS).                                                                                                                                                  | 4                    |
| <b>METHODS</b>                     |    |                                                                                                                                                                                                                                                                                                             |                      |
| Protocol and registration          | 5  | Indicate if a review protocol exists, if and where it can be accessed (e.g., Web address), and, if available, provide registration information including registration number.                                                                                                                               | 5                    |
| Eligibility criteria               | 6  | Specify study characteristics (e.g., PICOS, length of follow-up) and report characteristics (e.g., years considered, language, publication status) used as criteria for eligibility, giving rationale.                                                                                                      | 5                    |
| Information sources                | 7  | Describe all information sources (e.g., databases with dates of coverage, contact with study authors to identify additional studies) in the search and date last searched.                                                                                                                                  | 5,6                  |
| Search                             | 8  | Present full electronic search strategy for at least one database, including any limits used, such that it could be repeated.                                                                                                                                                                               | 5,6, Supp material 1 |
| Study selection                    | 9  | State the process for selecting studies (i.e., screening, eligibility, included in systematic review, and, if applicable, included in the meta-analysis).                                                                                                                                                   | 6                    |
| Data collection process            | 10 | Describe method of data extraction from reports (e.g., piloted forms, independently, in duplicate) and any processes for obtaining and confirming data from investigators.                                                                                                                                  | 6                    |
| Data items                         | 11 | List and define all variables for which data were sought (e.g., PICOS, funding sources) and any assumptions and simplifications made.                                                                                                                                                                       | 6, Supp material 2   |
| Risk of bias in individual studies | 12 | Describe methods used for assessing risk of bias of individual studies (including specification of whether this was done at the study or outcome level), and how this information is to be used in any data synthesis.                                                                                      | 6                    |
| Summary measures                   | 13 | State the principal summary measures (e.g., risk ratio, difference in means).                                                                                                                                                                                                                               | 6                    |

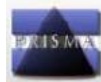

# PRISMA 2009 Checklist

Page 1 of 2

|                      |    |                                                                                                                                                           |   |
|----------------------|----|-----------------------------------------------------------------------------------------------------------------------------------------------------------|---|
| Synthesis of results | 14 | Describe the methods of handling data and combining results of studies, if done, including measures of consistency (e.g., $I^2$ ) for each meta-analysis. | 7 |
|----------------------|----|-----------------------------------------------------------------------------------------------------------------------------------------------------------|---|

| Section/topic               | #  | Checklist item                                                                                                                                   | Reported on page # |
|-----------------------------|----|--------------------------------------------------------------------------------------------------------------------------------------------------|--------------------|
| Risk of bias across studies | 15 | Specify any assessment of risk of bias that may affect the cumulative evidence (e.g., publication bias, selective reporting within studies).     | 6                  |
| Additional analyses         | 16 | Describe methods of additional analyses (e.g., sensitivity or subgroup analyses, meta-regression), if done, indicating which were pre-specified. | 7                  |

| RESULTS                       |    |                                                                                                                                                                                                          |                         |
|-------------------------------|----|----------------------------------------------------------------------------------------------------------------------------------------------------------------------------------------------------------|-------------------------|
| Study selection               | 17 | Give numbers of studies screened, assessed for eligibility, and included in the review, with reasons for exclusions at each stage, ideally with a flow diagram.                                          | 7, Figure 1             |
| Study characteristics         | 18 | For each study, present characteristics for which data were extracted (e.g., study size, PICOS, follow-up period) and provide the citations.                                                             | 7,8, Supp material 3    |
| Risk of bias within studies   | 19 | Present data on risk of bias of each study and, if available, any outcome level assessment (see item 12).                                                                                                | 9, Figures 2a,b,c,d,e   |
| Results of individual studies | 20 | For all outcomes considered (benefits or harms), present, for each study: (a) simple summary data for each intervention group (b) effect estimates and confidence intervals, ideally with a forest plot. | 9-13, Figures 3a,b,c,d, |
| Synthesis of results          | 21 | Present results of each meta-analysis done, including confidence intervals and measures of consistency.                                                                                                  | 9-12, Figures 3a,b,c,d  |
| Risk of bias across studies   | 22 | Present results of any assessment of risk of bias across studies (see Item 15).                                                                                                                          | 13                      |
| Additional analysis           | 23 | Give results of additional analyses, if done (e.g., sensitivity or subgroup analyses, meta-regression [see Item 16]).                                                                                    | 13, Figures 4a,b,c      |

| DISCUSSION          |    |                                                                                                                                                                                      |       |
|---------------------|----|--------------------------------------------------------------------------------------------------------------------------------------------------------------------------------------|-------|
| Summary of evidence | 24 | Summarize the main findings including the strength of evidence for each main outcome; consider their relevance to key groups (e.g., healthcare providers, users, and policy makers). | 13-15 |
| Limitations         | 25 | Discuss limitations at study and outcome level (e.g., risk of bias), and at review-level (e.g., incomplete retrieval of identified research, reporting bias).                        | 13-15 |

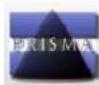

# PRISMA 2009 Checklist

1  
2  
3  
4  
5  
6  
7  
8  
9  
10  
11  
12  
13  
14  
15  
16  
17  
18  
19  
20  
21  
22  
23  
24  
25  
26  
27  
28  
29  
30  
31  
32  
33  
34  
35  
36  
37  
38  
39  
40  
41  
42  
43  
44  
45  
46  
47

|                |    |                                                                                                                                            |       |
|----------------|----|--------------------------------------------------------------------------------------------------------------------------------------------|-------|
| Conclusions    | 26 | Provide a general interpretation of the results in the context of other evidence, and implications for future research.                    | 13-15 |
| <b>FUNDING</b> |    |                                                                                                                                            |       |
| Funding        | 27 | Describe sources of funding for the systematic review and other support (e.g., supply of data); role of funders for the systematic review. | 0     |

From: Moher D, Liberati A, Tetzlaff J, Altman DG, The PRISMA Group (2009). Preferred Reporting Items for Systematic Reviews and Meta-Analyses: The PRISMA Statement. PLoS Med 6(7): e1000097. doi:10.1371/journal.pmed1000097

For more information, visit: [www.prisma-statement.org](http://www.prisma-statement.org).

Page 2 of 2
