# Supplementary material for: Smoking cessation in individuals who use vaping as compared with traditional nicotine replacement therapies: a systematic review and meta-analysis
Source: HighWire-hosted journal article supplement (doi:10.1136/bmjopen-2020-044222), 2021-02-01
Supplement: bmjopen-2020-044222supp002_data_supplement.pdf [file bmjopen-2020-044222supp002_data_supplement.pdf]

## Supplementary Material 2

### Abstracted data

The abstracted data included the following:

- 1- *study characteristics*:  
author names, year of publication, ties with tobacco industry, funding of study, country of study, study setting, study design, number of participating sites, recruitment procedures, enrolment dates, length of study period, random sequence generation, allocation sequence concealment, blinding, methods for preventing and controlling confounding, selection bias, information bias and missing bias, unit of analysis, covariates inclusion, funding, financial and conflict of interest disclosure including ties with industry, inclusion and exclusion criteria, sample size, number of participants that were analyzed, number of participants lost to follow up for each outcome and for the whole study, number of participants at study onset and randomized to each group, and type of analysis (intention to treat vs per protocol)
- 2- *participant characteristics*:  
age, gender, comorbidities, ethnicities, socio-economic status, income, education, cigarettes smoked per day, Fagerström test for cigarette dependence
- 3- *intervention characteristics*:  
type, model, brand and generation of ENDS, type and flavor of e-liquid, nicotine content, intervention protocol, length of time ENDS were provided free of charge, frequency of use, duration of intervention, integrity of intervention, description of co-interventions
- 4- *comparator characteristics*:  
type of nicotine replacement therapy used, dose, frequency of use, nicotine content, control protocol, frequency of use, length of time supplies were provided free of charge, combination of products, frequency of use duration of control, integrity of control, description of co-interventions
- 5- *outcomes*:  
smoking cessation, method of assessment for smoking cessation used (self-report vs biochemical), smoking abstinence definition, longest time point of smoking cessation, harms assessment, methods of harms assessment, definition of harms, withdrawal symptoms, method of assessment for withdrawal symptoms, reduction in cigarettes smoked, method of assessment of reduction in cigarettes smoked, number of quit attempts, method of quit attempt measurement, acceptance of ENDS/NRT, method of acceptance assessment, method of aggregation used for each outcome, timing of measurement for each outcome, summary data for each outcome, method of aggregation used for each outcome.
