# Supplementary material for: Smoking cessation in individuals who use vaping as compared with traditional nicotine replacement therapies: a systematic review and meta-analysis
Source: HighWire-hosted journal article supplement (doi:10.1136/bmjopen-2020-044222), 2021-02-01
Supplement: bmjopen-2020-044222supp004_data_supplement.pdf [file bmjopen-2020-044222supp004_data_supplement.pdf]

**Supplementary Material 4**  
**Details on Risk of Bias Assessment for each outcome of interest**

**Supplementary Table 2. Detailed description of concerns for each domain marked identified as “some concerns” or “high risk” on Risk of Bias Assessment**

| Smoking cessation outcome |                                                                                                                  |                                                                                                                                                                                                                                                                                                                                               |                                                                                                                          |                            |                                  |
|---------------------------|------------------------------------------------------------------------------------------------------------------|-----------------------------------------------------------------------------------------------------------------------------------------------------------------------------------------------------------------------------------------------------------------------------------------------------------------------------------------------|--------------------------------------------------------------------------------------------------------------------------|----------------------------|----------------------------------|
|                           | Randomization Process                                                                                            | Deviations from intended intervention                                                                                                                                                                                                                                                                                                         | Missing of outcome data                                                                                                  | Measurement of the outcome | Selection of the reported result |
| <b>Bullen 2013</b>        | Low risk                                                                                                         | Adherence higher in the ENDS group compared to NRT group at all timepoints. At 6 months, 29% of ENDS group vs 8% of NRT group still using assigned treatment.                                                                                                                                                                                 | Low risk                                                                                                                 | Low risk                   | Low risk                         |
| <b>Hajek 2019</b>         | Low risk                                                                                                         | At 52 weeks among participants with 1-year abstinence, 80% were using e-cigarettes in the ENDS group vs 9% in the NRT group. Also, 6% of participants in the ENDS group reported using non-allocated NRT for at least five consecutive days in the past six months compared to 22% in the NRT group that reported using non-allocated product | Low risk                                                                                                                 | Low risk                   | Low risk                         |
| <b>Hatsukami 2019</b>     | No information provided with regards to randomization process and allocation concealment. However, there were no | The NRT group had the highest dropout rates compared to the other groups in the study. At 8 weeks, 24% dropped out in the ENDS group compared to 30% in the NRT group.                                                                                                                                                                        | Large number of dropouts; participants who did not stop smoking could be less motivated to continue with study follow up | Low risk                   | Low risk                         |

|                                  |                                                                                         |                                                                                                                                                     |                                                                                                                                                                                                                                         |          |                                              |
|----------------------------------|-----------------------------------------------------------------------------------------|-----------------------------------------------------------------------------------------------------------------------------------------------------|-----------------------------------------------------------------------------------------------------------------------------------------------------------------------------------------------------------------------------------------|----------|----------------------------------------------|
|                                  | significant baseline differences between groups                                         |                                                                                                                                                     |                                                                                                                                                                                                                                         |          |                                              |
| <b>Lee, SH 2019</b>              | The use of constant block sizes of 2 makes it easy to determine order of randomization. | No participants discontinued the intervention. However, 4 and 14 participants in the ENDS and NRT group dropped out before treatment, respectively. | Although data was missing for 12% of randomized individuals, all dropouts occurred prior to the start of treatment. Missingness in this case less likely to be due to the value of the outcome as it happened prior to onset of therapy | Low risk | Low risk                                     |
| <b>Lee, SM 2018</b>              | Low risk                                                                                | Low risk                                                                                                                                            | Low risk                                                                                                                                                                                                                                | Low risk | Low risk                                     |
| <b>Smoking reduction outcome</b> |                                                                                         |                                                                                                                                                     |                                                                                                                                                                                                                                         |          |                                              |
| <b>Bullen 2013</b>               | Low risk                                                                                | Refer to smoking cessation outcome                                                                                                                  | Sensitivity analyses conducted for the smoking cessation outcome were not performed for the smoking reduction outcome                                                                                                                   | Low risk | Low risk                                     |
| <b>Eisenhofer 2015</b>           | Not enough information available in abstract                                            | Not enough information available in abstract                                                                                                        | Not enough information available in abstract                                                                                                                                                                                            | Low risk | Not enough information available in abstract |
| <b>Hajek 2019</b>                | Low risk                                                                                | Refer to smoking cessation outcome                                                                                                                  | Low risk                                                                                                                                                                                                                                | Low risk | Low risk                                     |
| <b>Hatsukami 2019</b>            | Refer to smoking cessation outcome                                                      | Refer to smoking cessation outcome                                                                                                                  | Refer to smoking cessation outcome                                                                                                                                                                                                      | Low risk | Low risk                                     |
| <b>Lee, SH 2019</b>              | Refer to smoking cessation outcome                                                      | Refer to smoking cessation outcome                                                                                                                  | Refer to smoking cessation outcome                                                                                                                                                                                                      | Low risk | Low risk                                     |
| <b>Lee, SM 2018</b>              | Low risk                                                                                | Low risk                                                                                                                                            | Low risk                                                                                                                                                                                                                                | Low risk | Low risk                                     |
| <b>Harms outcome</b>             |                                                                                         |                                                                                                                                                     |                                                                                                                                                                                                                                         |          |                                              |

|                       |                                    |                                                                                                                                                                                                  |                                                                                                                                                                                                                   |                                                                                                                                                  |          |
|-----------------------|------------------------------------|--------------------------------------------------------------------------------------------------------------------------------------------------------------------------------------------------|-------------------------------------------------------------------------------------------------------------------------------------------------------------------------------------------------------------------|--------------------------------------------------------------------------------------------------------------------------------------------------|----------|
| <b>Bullen 2013</b>    | Low risk                           | Differences in treatment adherence could potentially lead to discrepancies in harm reporting                                                                                                     | No information on the proportion of participants on whom adverse events were collected; it is likely that people who experienced more severe side effects did not continue with study follow-up activities        | high likelihood that participants who were unhappy with their treatment allocation would report side effects more often than their counterparts. | Low risk |
| <b>Hajek 2019</b>     | Low risk                           | Differences in treatment adherence could potentially lead to discrepancies in harm reporting                                                                                                     | The authors reported harm data based on number of participants at randomization, however significant dropout seen at 4-week follow up, raising concerns that adverse event data not collected on all participants | High likelihood that participants who were unhappy with their treatment allocation would report side effects more often than their counterparts  | Low risk |
| <b>Hatsukami 2019</b> | Refer to smoking cessation outcome | Differences in treatment adherence could potentially lead to discrepancies in harm reporting                                                                                                     | No information on the proportion of participants on whom adverse events were collected; it is likely that people who experienced more severe side effects did not continue with study follow-up activities        | High likelihood that participants who were unhappy with their treatment allocation would report side effects more often than their counterparts  | Low risk |
| <b>Lee, SH 2019</b>   | Refer to smoking cessation outcome | Differences in treatment adherence could potentially lead to discrepancies in harm reporting however non-adherence happened prior to onset of treatment, therefore less likely to have an impact | Low risk                                                                                                                                                                                                          | High likelihood that participants who were unhappy with their treatment allocation would report side effects more often than their counterparts  | Low risk |
| <b>Lee, SM 2018</b>   | Low risk                           | Low risk                                                                                                                                                                                         | Low risk                                                                                                                                                                                                          | High likelihood that participants who were unhappy with their                                                                                    | Low risk |

|                                    |                                              |                                                                                                             |                                                                                                                                                                              |                                                                                                                                                                                                              |                                                                   |
|------------------------------------|----------------------------------------------|-------------------------------------------------------------------------------------------------------------|------------------------------------------------------------------------------------------------------------------------------------------------------------------------------|--------------------------------------------------------------------------------------------------------------------------------------------------------------------------------------------------------------|-------------------------------------------------------------------|
|                                    |                                              |                                                                                                             |                                                                                                                                                                              | treatment allocation would report side effects more often than their counterparts                                                                                                                            |                                                                   |
| <b>Withdrawal symptoms outcome</b> |                                              |                                                                                                             |                                                                                                                                                                              |                                                                                                                                                                                                              |                                                                   |
| <b>Eisenhofer 2015</b>             | Not enough information available in abstract | Not enough information available in abstract                                                                | Not enough information available in abstract                                                                                                                                 | Not enough information available in abstract                                                                                                                                                                 | Not enough information available in abstract                      |
| <b>Hajek 2019</b>                  | Low risk                                     | Differences in treatment adherence could potentially lead to discrepancies in withdrawal symptoms reporting | Outcome not available for all randomized participants; likely that people who experienced more nicotine withdrawal symptoms did not continue with study follow-up activities | Given that the withdrawal measurements were self-reported, there is a high likelihood that participants who were unhappy with treatment allocation reported more withdrawal symptoms than their counterparts | Low risk                                                          |
| <b>Hatsukami 2019</b>              | Refer to smoking cessation outcome           | Differences in treatment adherence could potentially lead to discrepancies in withdrawal symptoms reporting | Outcome not available for all randomized participants; likely that people who experienced more nicotine withdrawal symptoms did not continue with study follow-up activities | Given that the withdrawal measurements were self-reported, there is a high likelihood that participants who were unhappy with treatment allocation reported more withdrawal symptoms than their counterparts | No information on how withdrawal symptom assessment was performed |
| <b>Lee, SM 2018</b>                | Low risk                                     | Low risk                                                                                                    | Low risk                                                                                                                                                                     | Given that the withdrawal measurements were self-reported, there is a high likelihood that participants who were                                                                                             | Low risk                                                          |

|                                      |                                              |                                                                                                             |                                                                                                          |                                                                                             |          |
|--------------------------------------|----------------------------------------------|-------------------------------------------------------------------------------------------------------------|----------------------------------------------------------------------------------------------------------|---------------------------------------------------------------------------------------------|----------|
|                                      |                                              |                                                                                                             |                                                                                                          | unhappy with treatment allocation reported more withdrawal symptoms than their counterparts |          |
| <b>Acceptance of therapy outcome</b> |                                              |                                                                                                             |                                                                                                          |                                                                                             |          |
| <b>Bullen 2013</b>                   | Low risk                                     | Differences in treatment adherence could potentially lead to discrepancies in acceptance of therapy outcome | Participants unhappy with their assigned therapy likely did not continue with study follow-up activities | Highly subjective outcome, inability to blind participants to assigned therapy              | Low risk |
| <b>Hajek 2019</b>                    | Low risk                                     | Differences in treatment adherence could potentially lead to discrepancies in acceptance of therapy outcome | Participants unhappy with their assigned therapy likely did not continue with study follow-up activities | Highly subjective outcome, inability to blind participants to assigned therapy              | Low risk |
| <b>Hatsukami 2019</b>                | Not enough information available in abstract | Differences in treatment adherence could potentially lead to discrepancies in acceptance of therapy outcome | Participants unhappy with their assigned therapy likely did not continue with study follow-up activities | Highly subjective outcome, inability to blind participants to assigned therapy              | Low risk |
| <b>Lee, SM 2018</b>                  | Low risk                                     | Low risk                                                                                                    | Low risk                                                                                                 | Highly subjective outcome, inability to blind participants to assigned therapy              | Low risk |
